# Supplementary material for: Total synthesis of padanamides A and B
Source: Royal Society of Chemistry journal article supplement (doi:10.1039/c3cc00178d), 2013-01-01

# Supporting Information

## Total Synthesis of Padanamides A and B

Bohua Long,<sup>a,b</sup> Shoubin Tang,<sup>c</sup> Ligong Chen,<sup>\*a</sup> Shiwei Qu,<sup>c</sup> Bo  
Chen,<sup>c</sup> Junyang Liu,<sup>c</sup> Anita R. Maguire,<sup>d</sup> Zhuo Wang,<sup>e</sup> Yuqing  
Liu,<sup>e</sup> Hui Zhang,<sup>c</sup> Zhengshuang Xu,<sup>\*c</sup> Tao Ye<sup>\*b,c,e</sup>

<sup>a</sup> School of Chemical Engineering and Technology, Tianjin University, Tianjin 300072, China; Email: lgchen@tju.edu.cn

<sup>b</sup> The Hong Kong Polytechnic University Shenzhen Research Institute

<sup>c</sup> Laboratory of Chemical Genomics, Peking University Shenzhen Graduate School, University Town of Shenzhen, Xili, Nanshan District, Shenzhen, China, 518055; E-mail: bctaoye@polyu.edu.hk; xuzs@pkusz.edu.cn

<sup>d</sup> Department of Chemistry and School of Pharmacy, Analytical and Biological Chemistry Research Facility, University College Cork, Cork, Ireland. Tel: (+) 353-21-4902125, E-mail: a.maguire@ucc.ie

<sup>e</sup> Department of Applied Biology & Chemical Technology, The Hong Kong Polytechnic University, Hung Hom, Kowloon, Hong Kong, China Tel: +852 34008722; E-mail: bctaoye@polyu.edu.hk

## Spectra

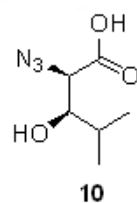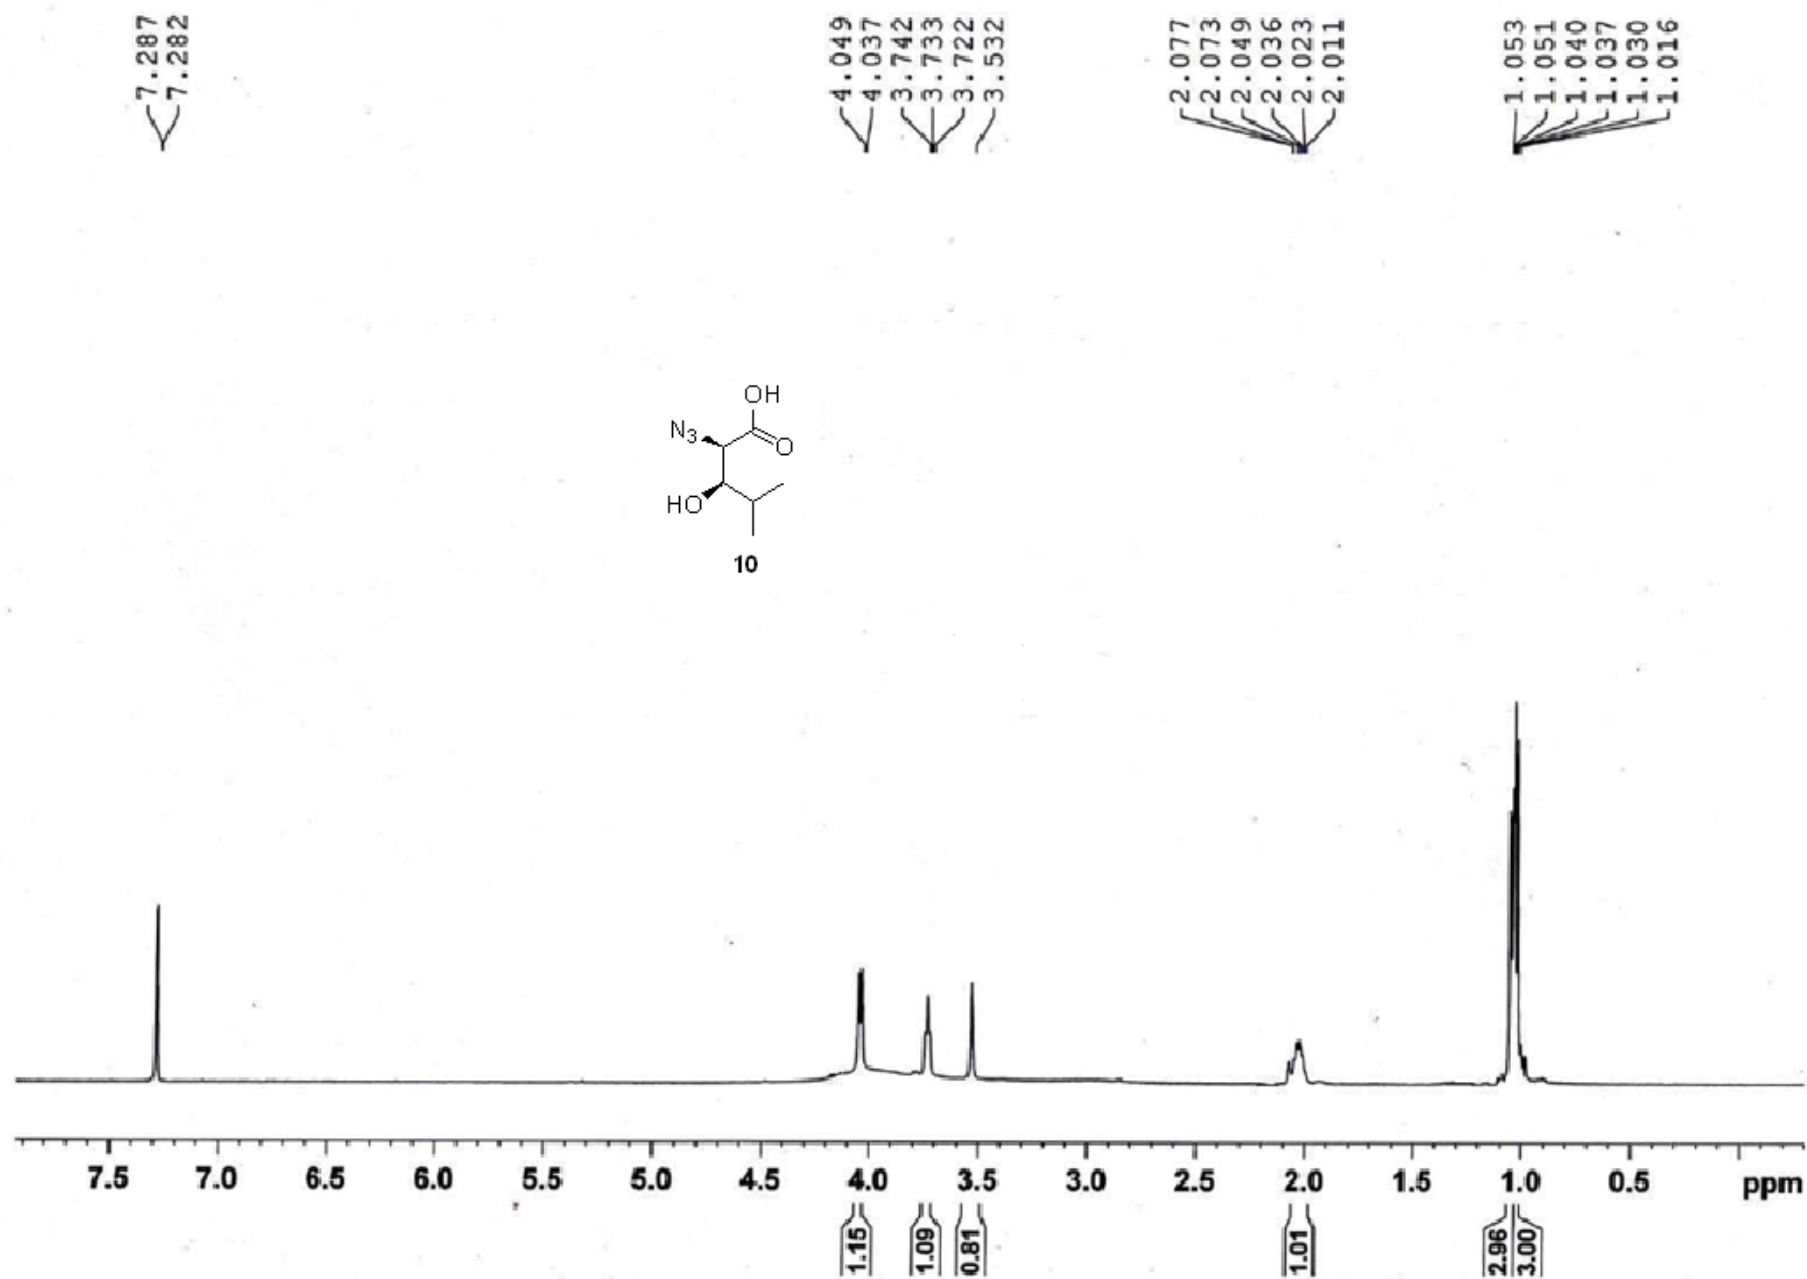

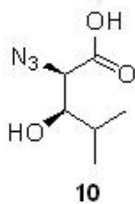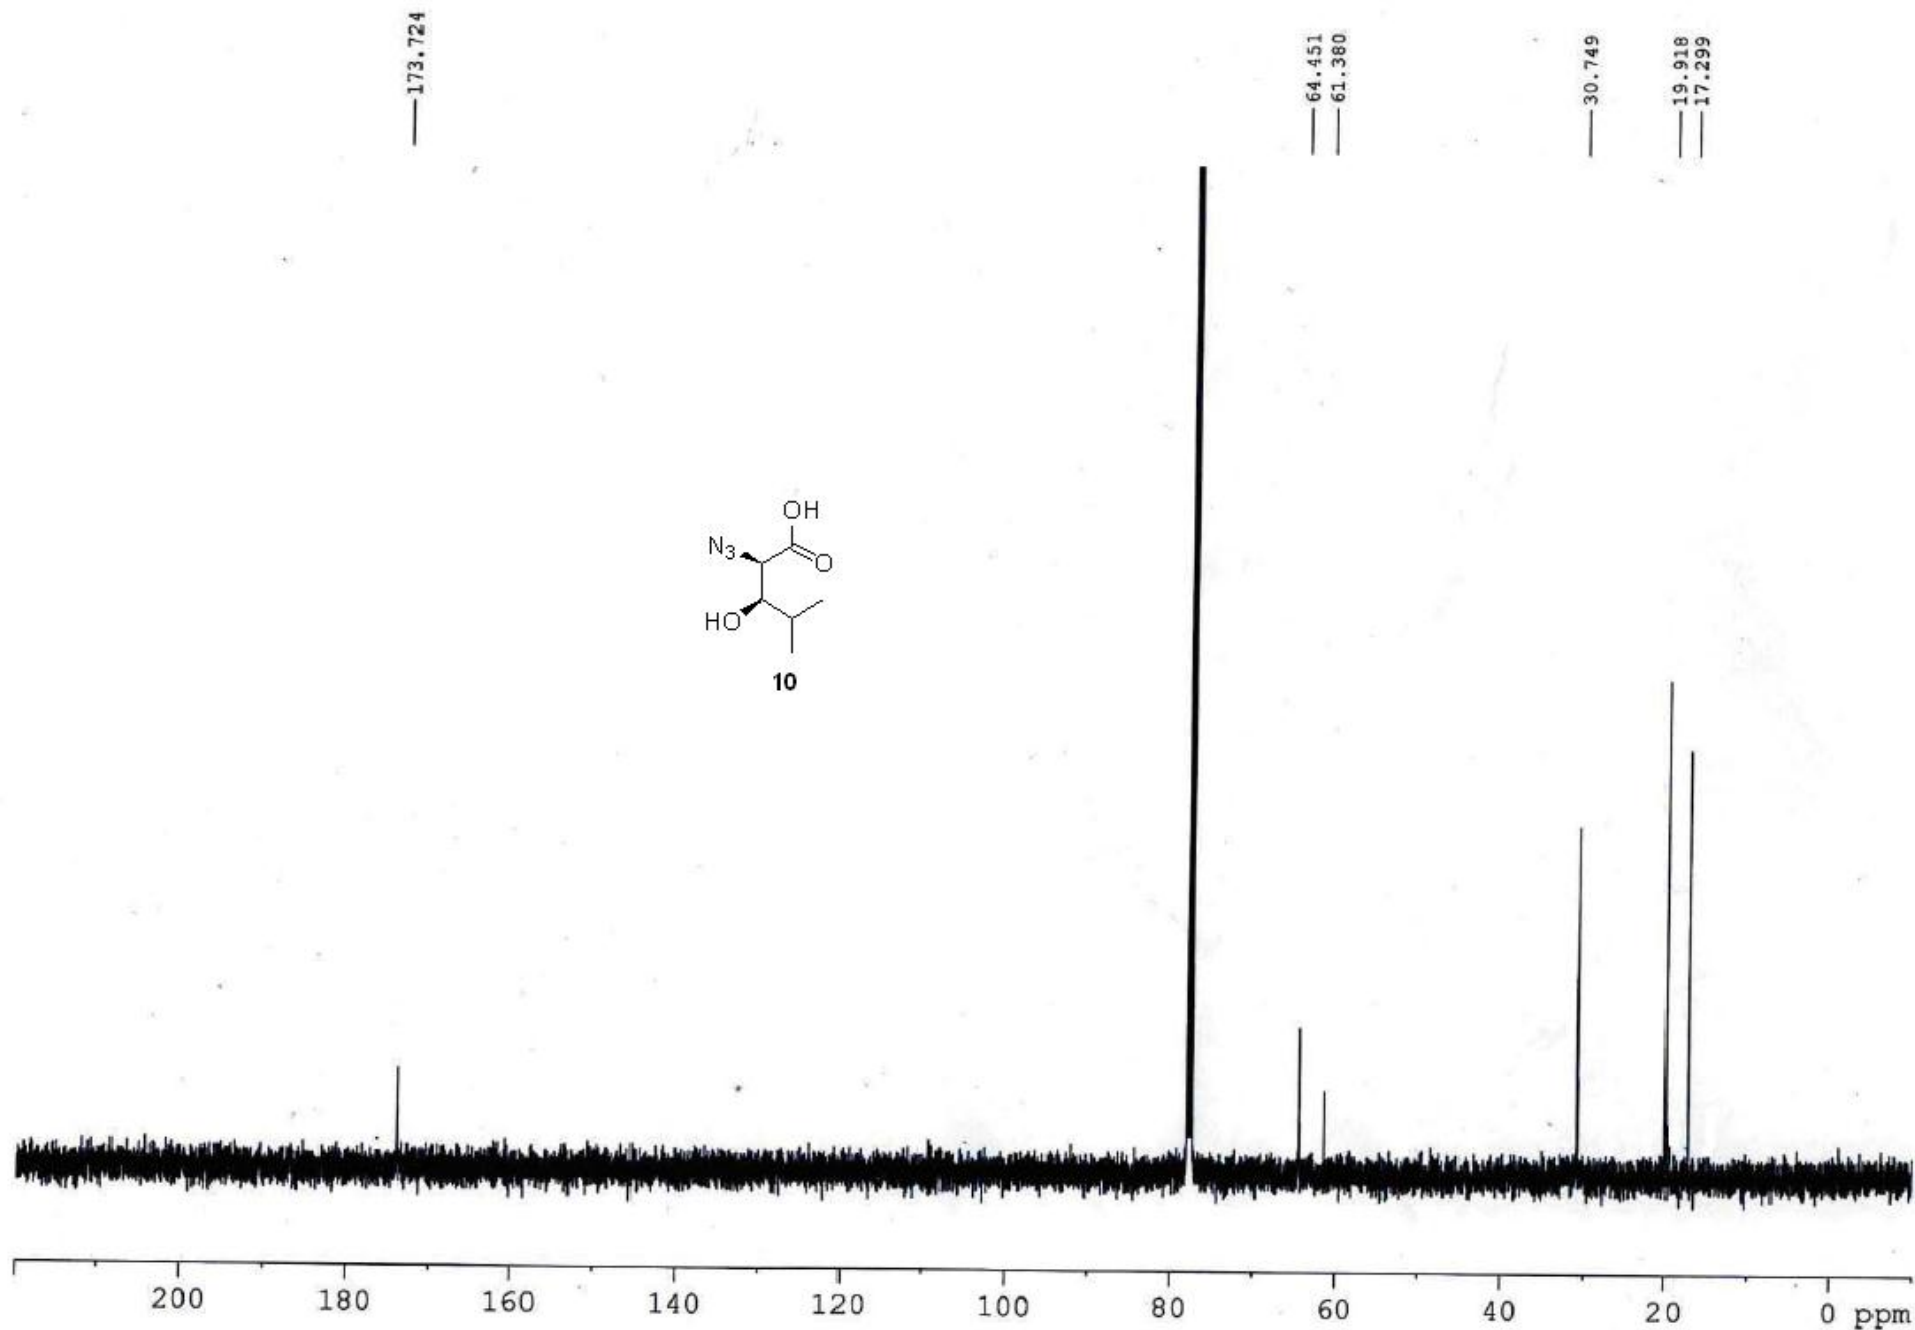

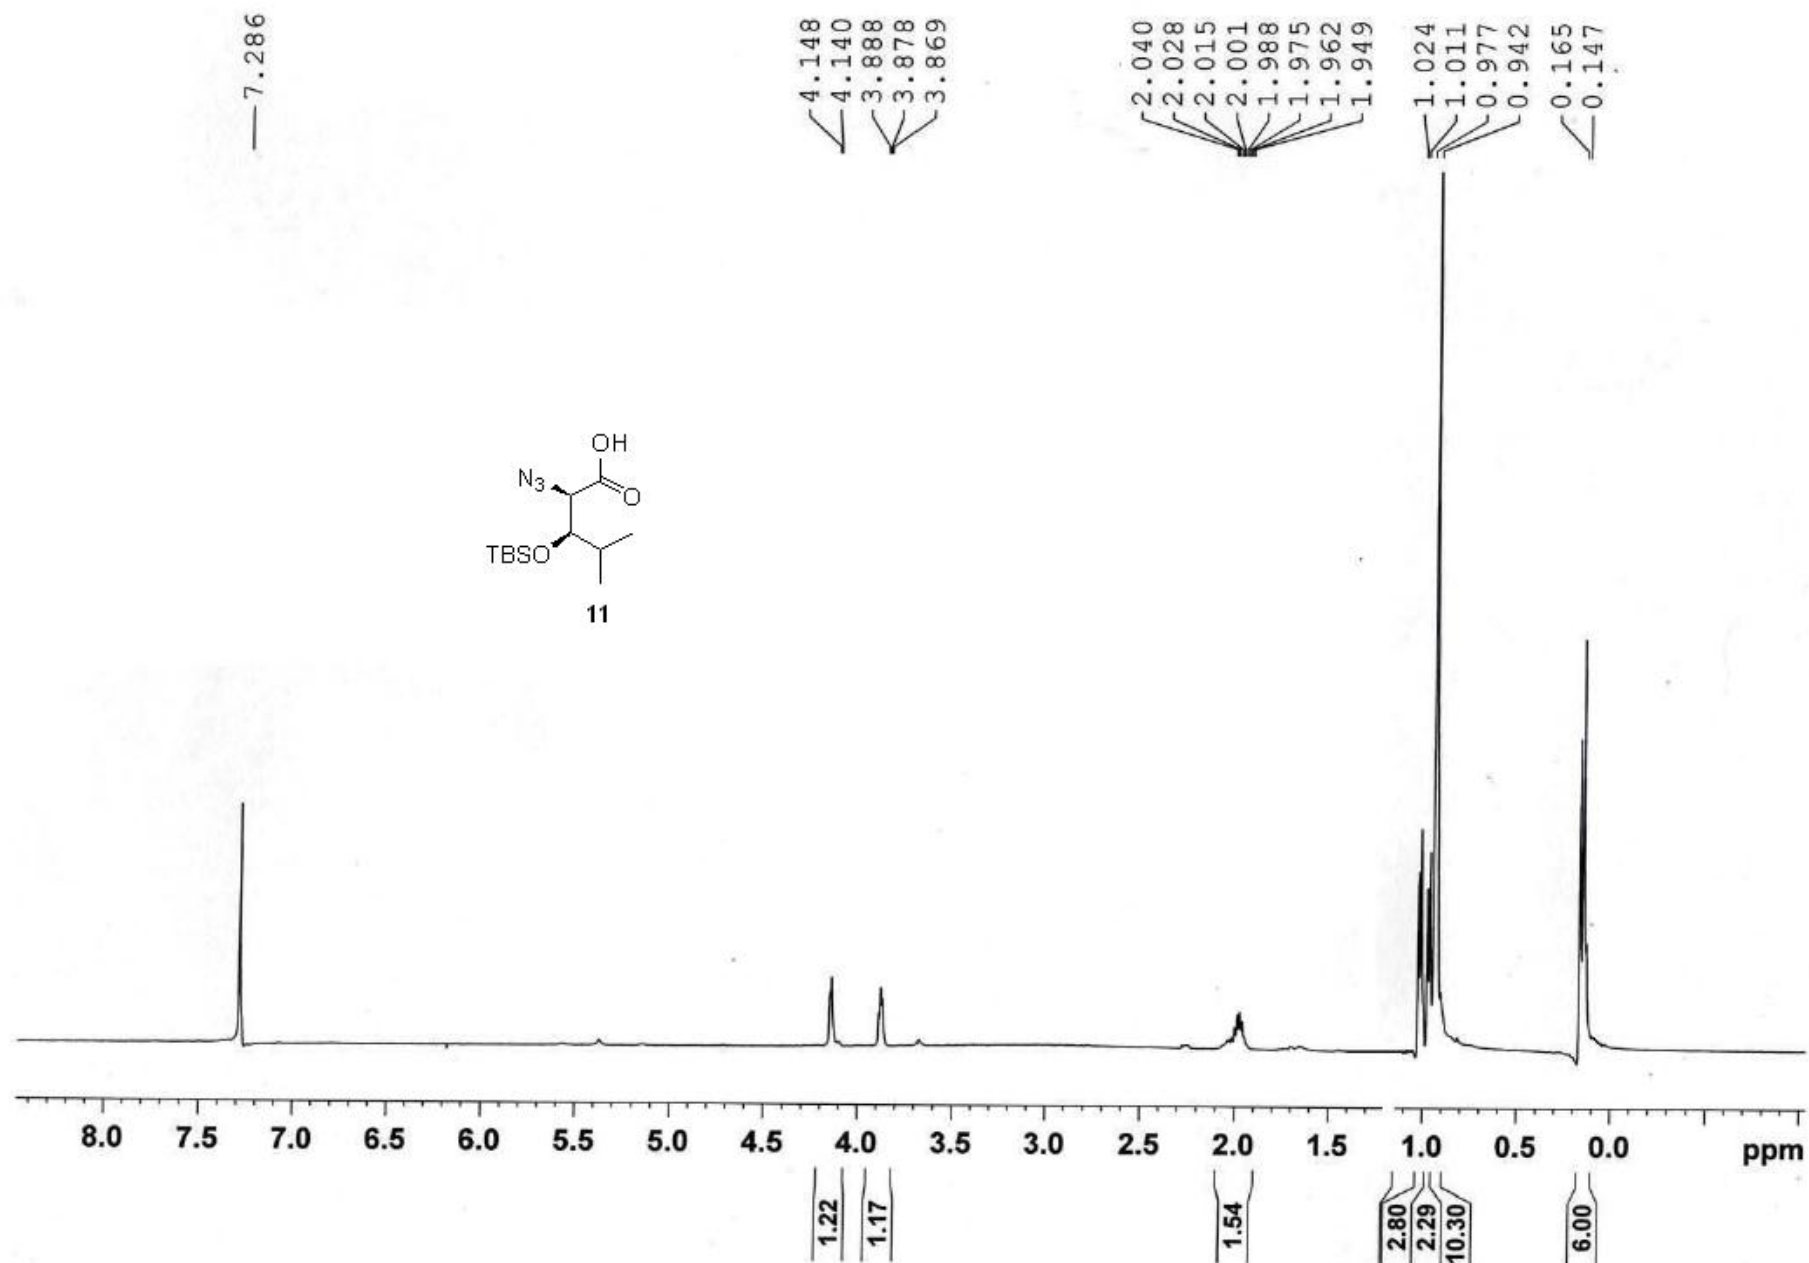

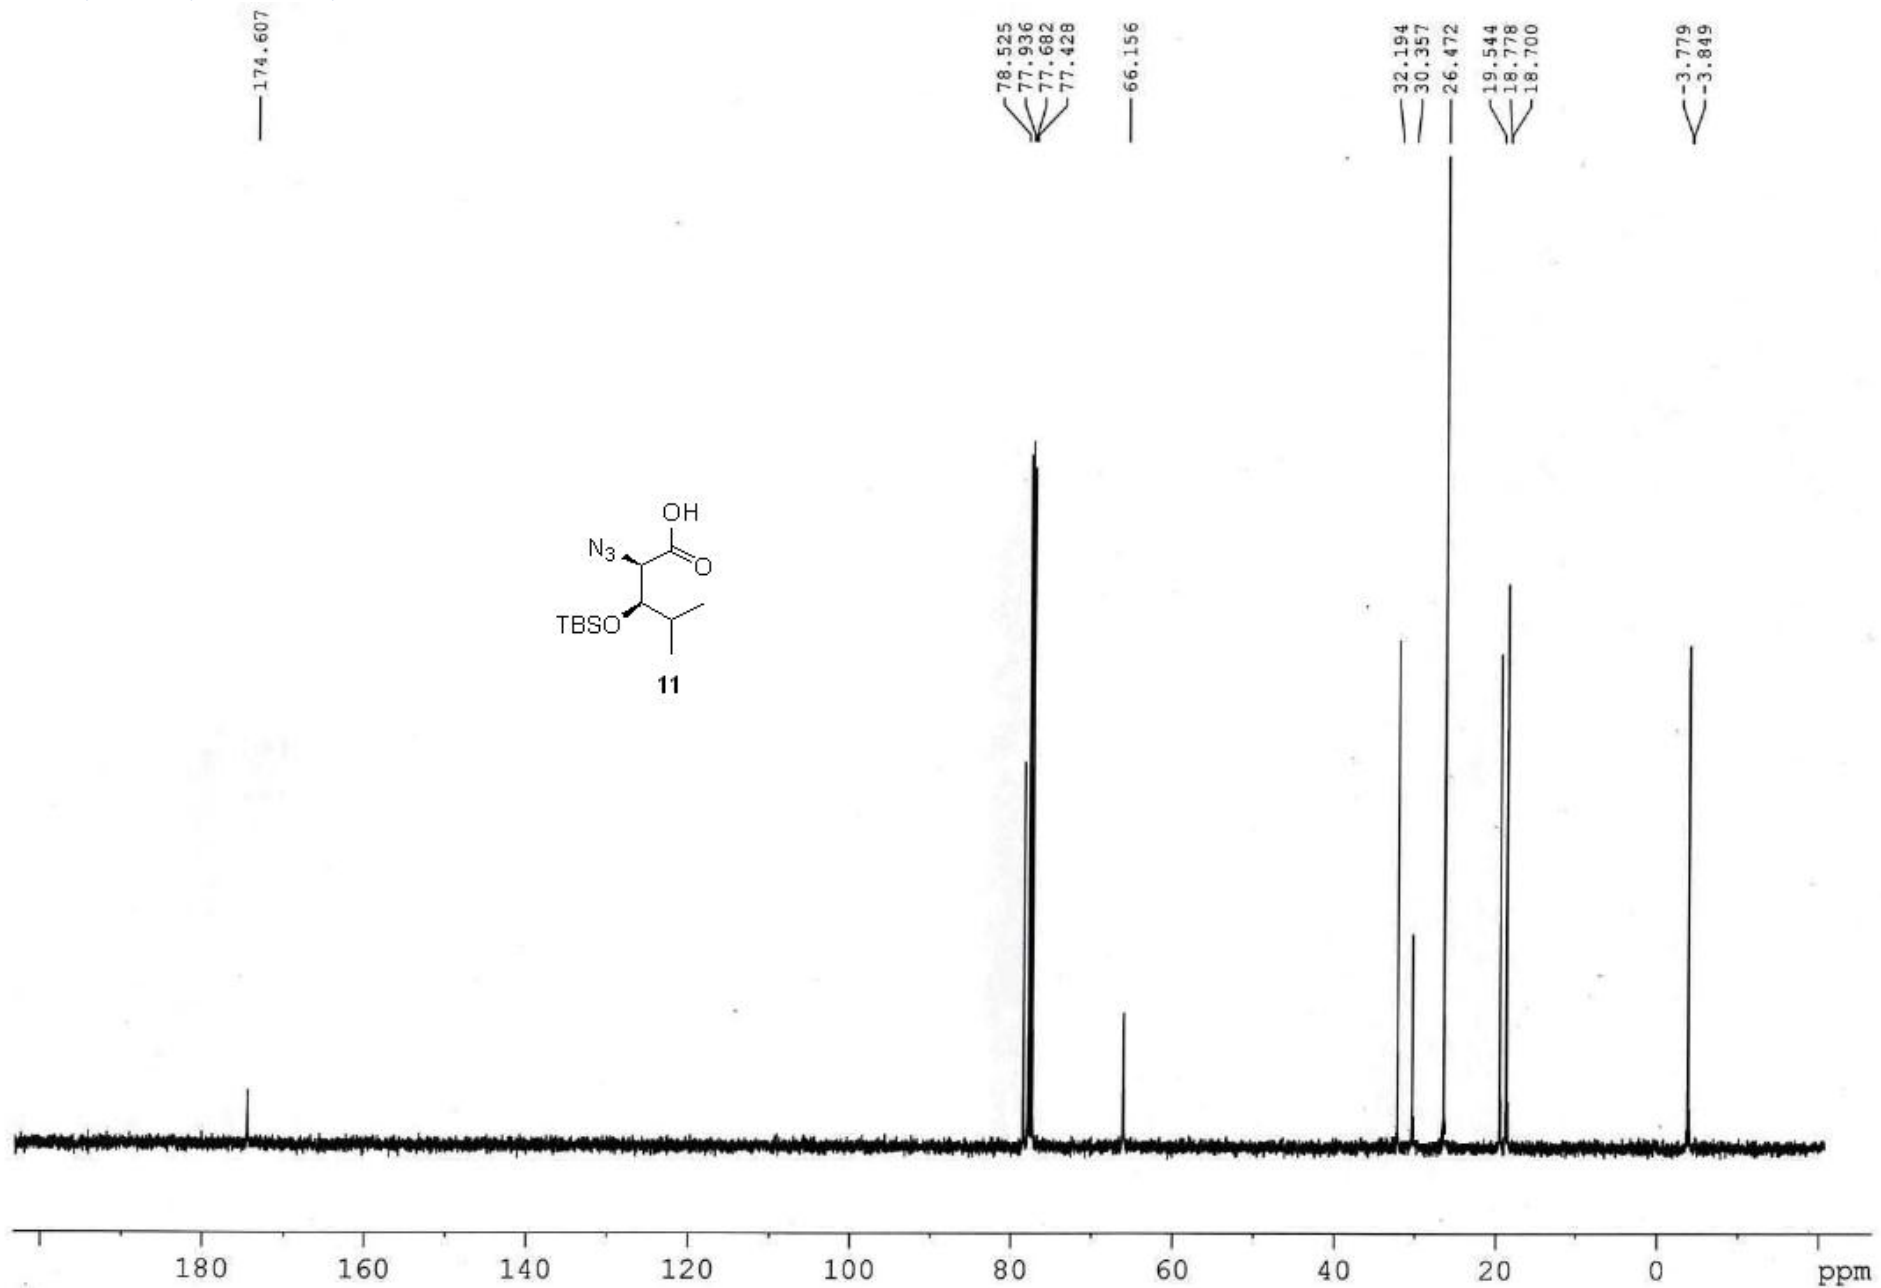

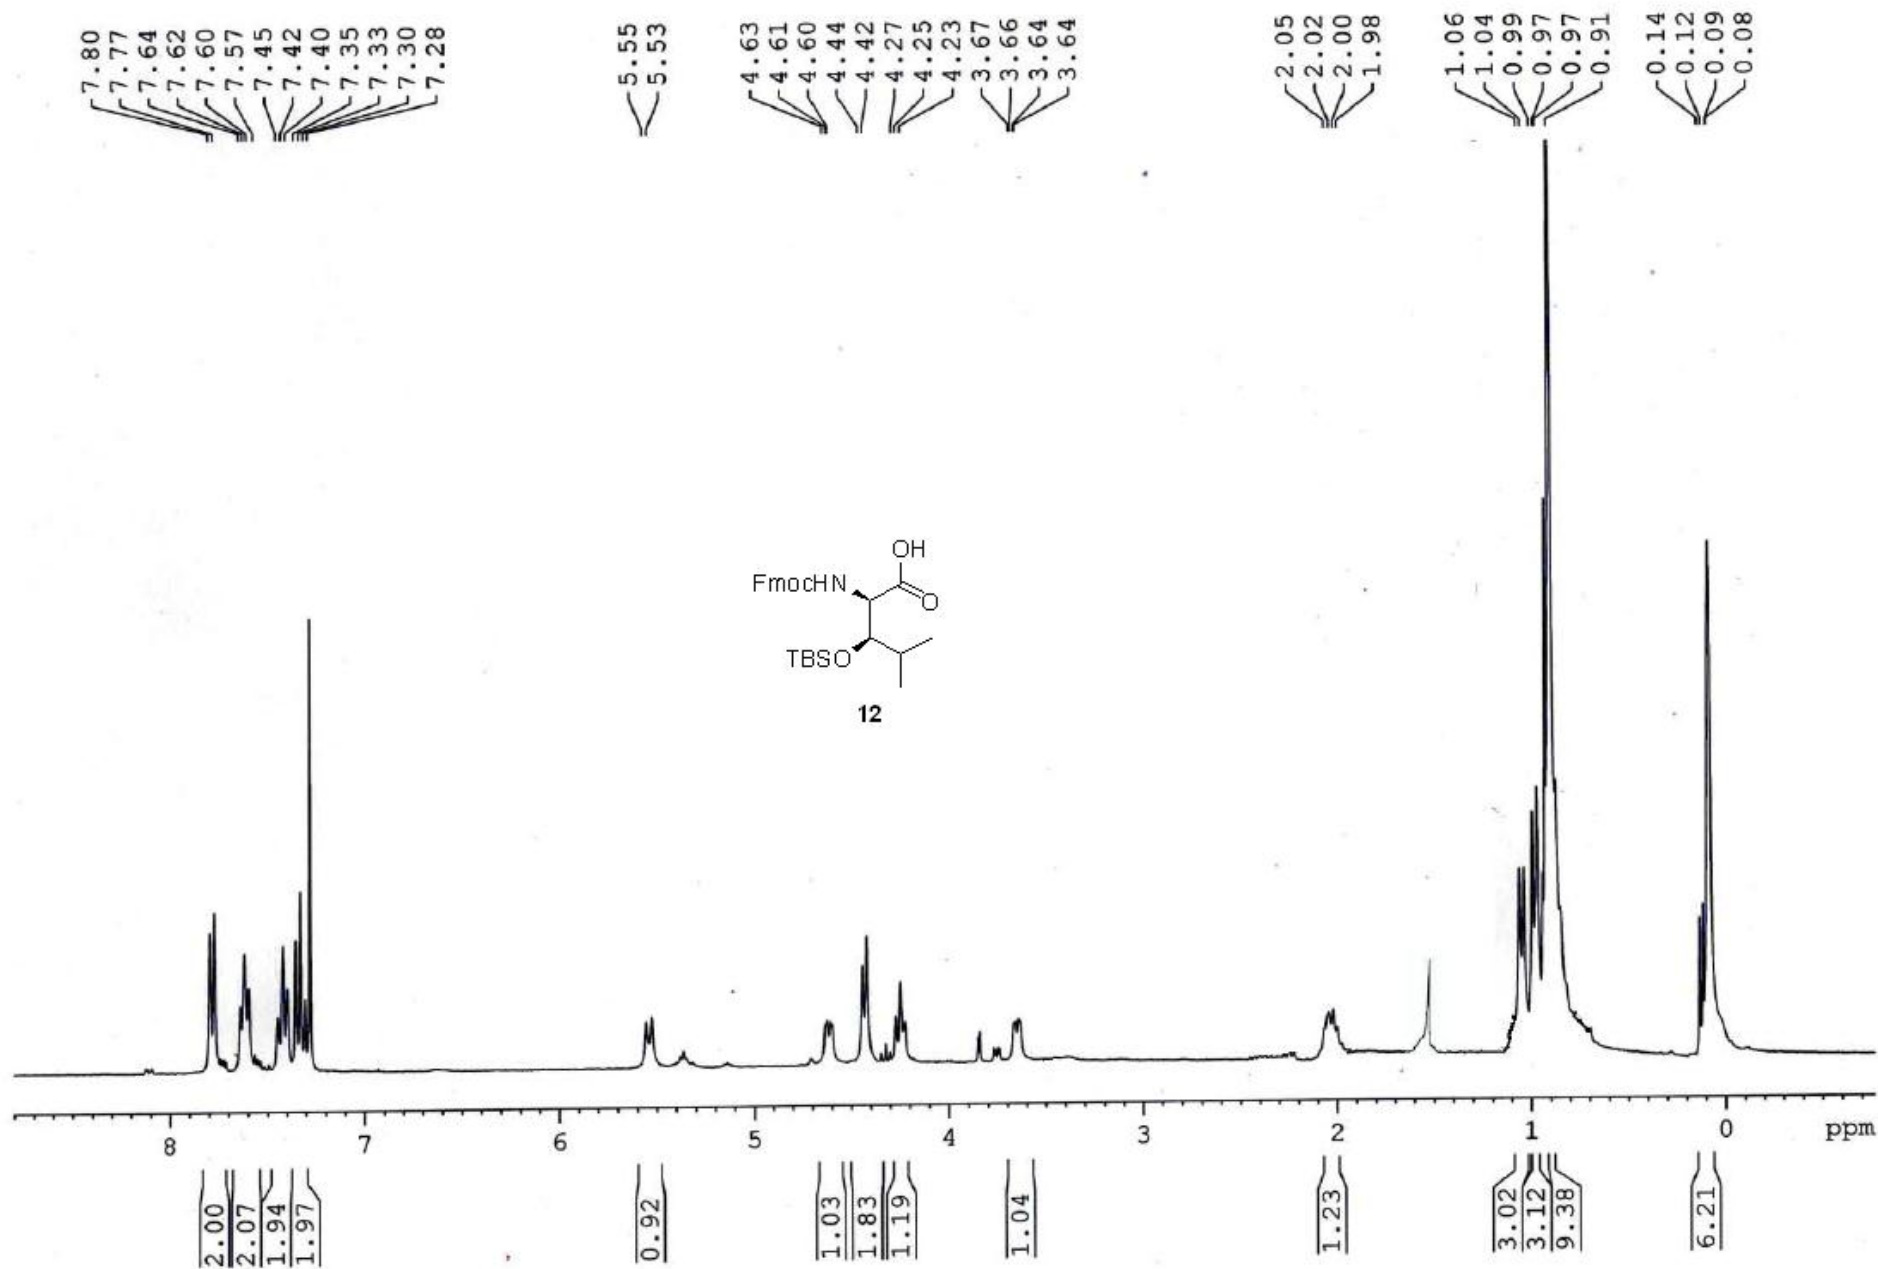

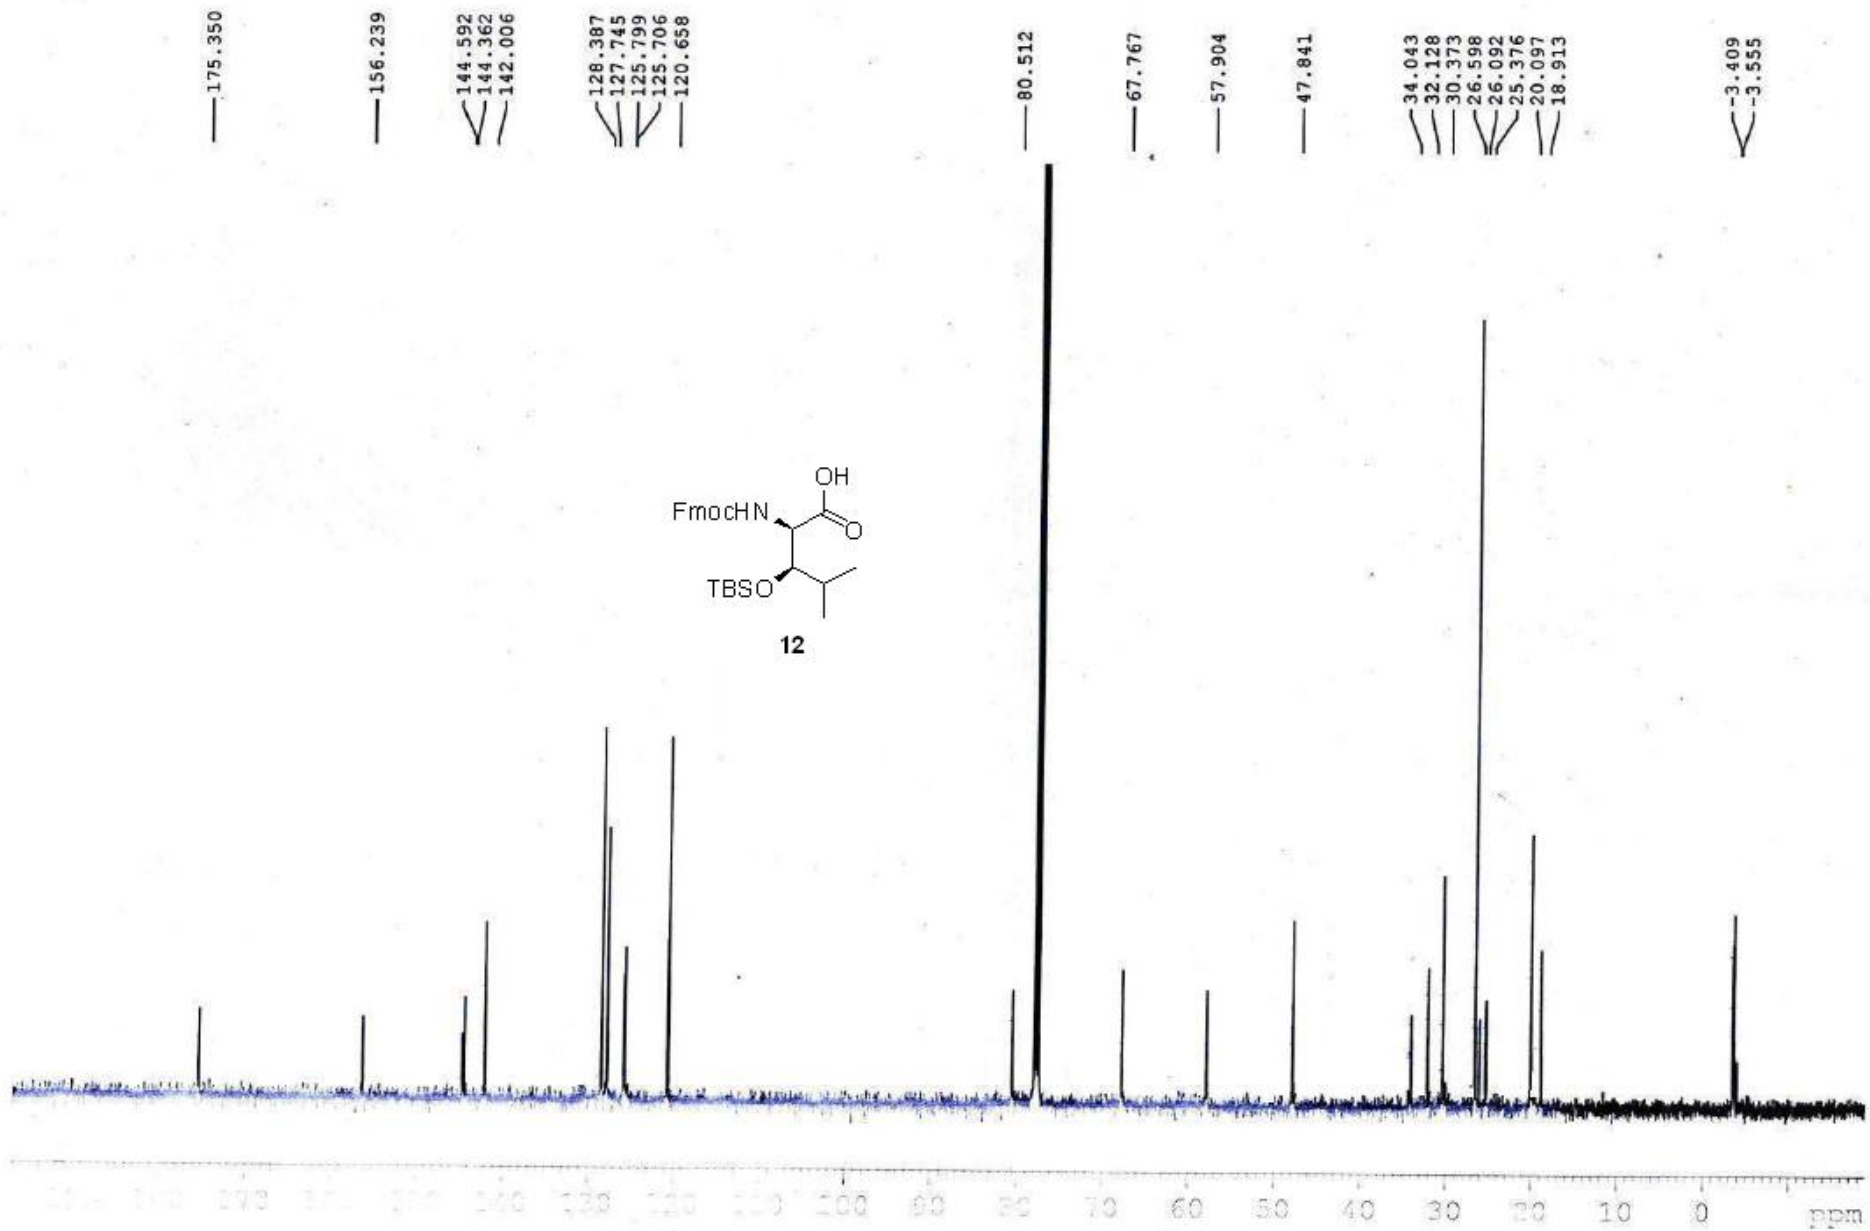

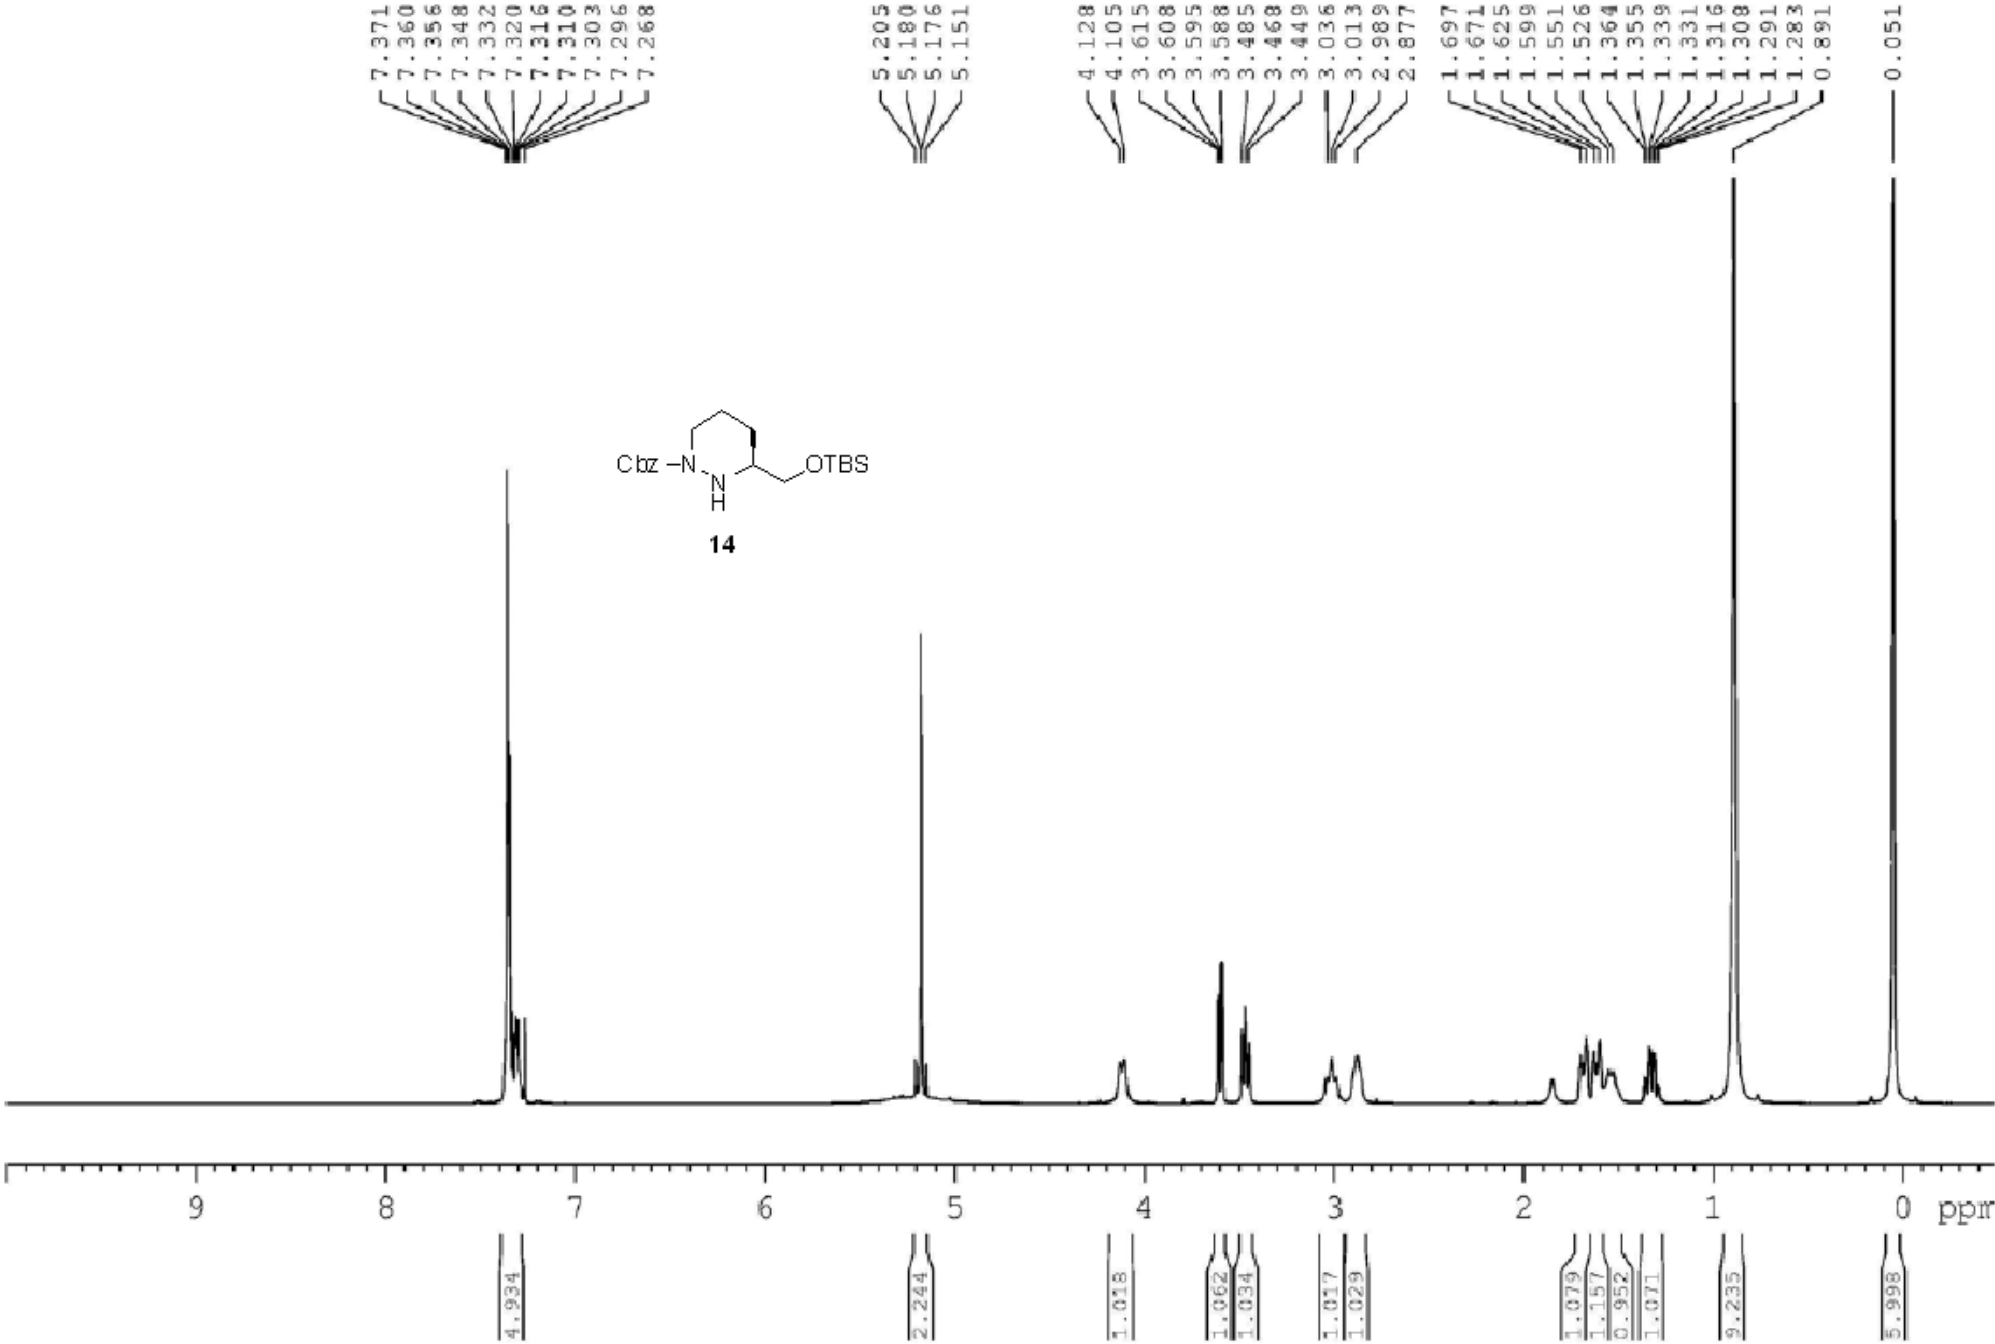



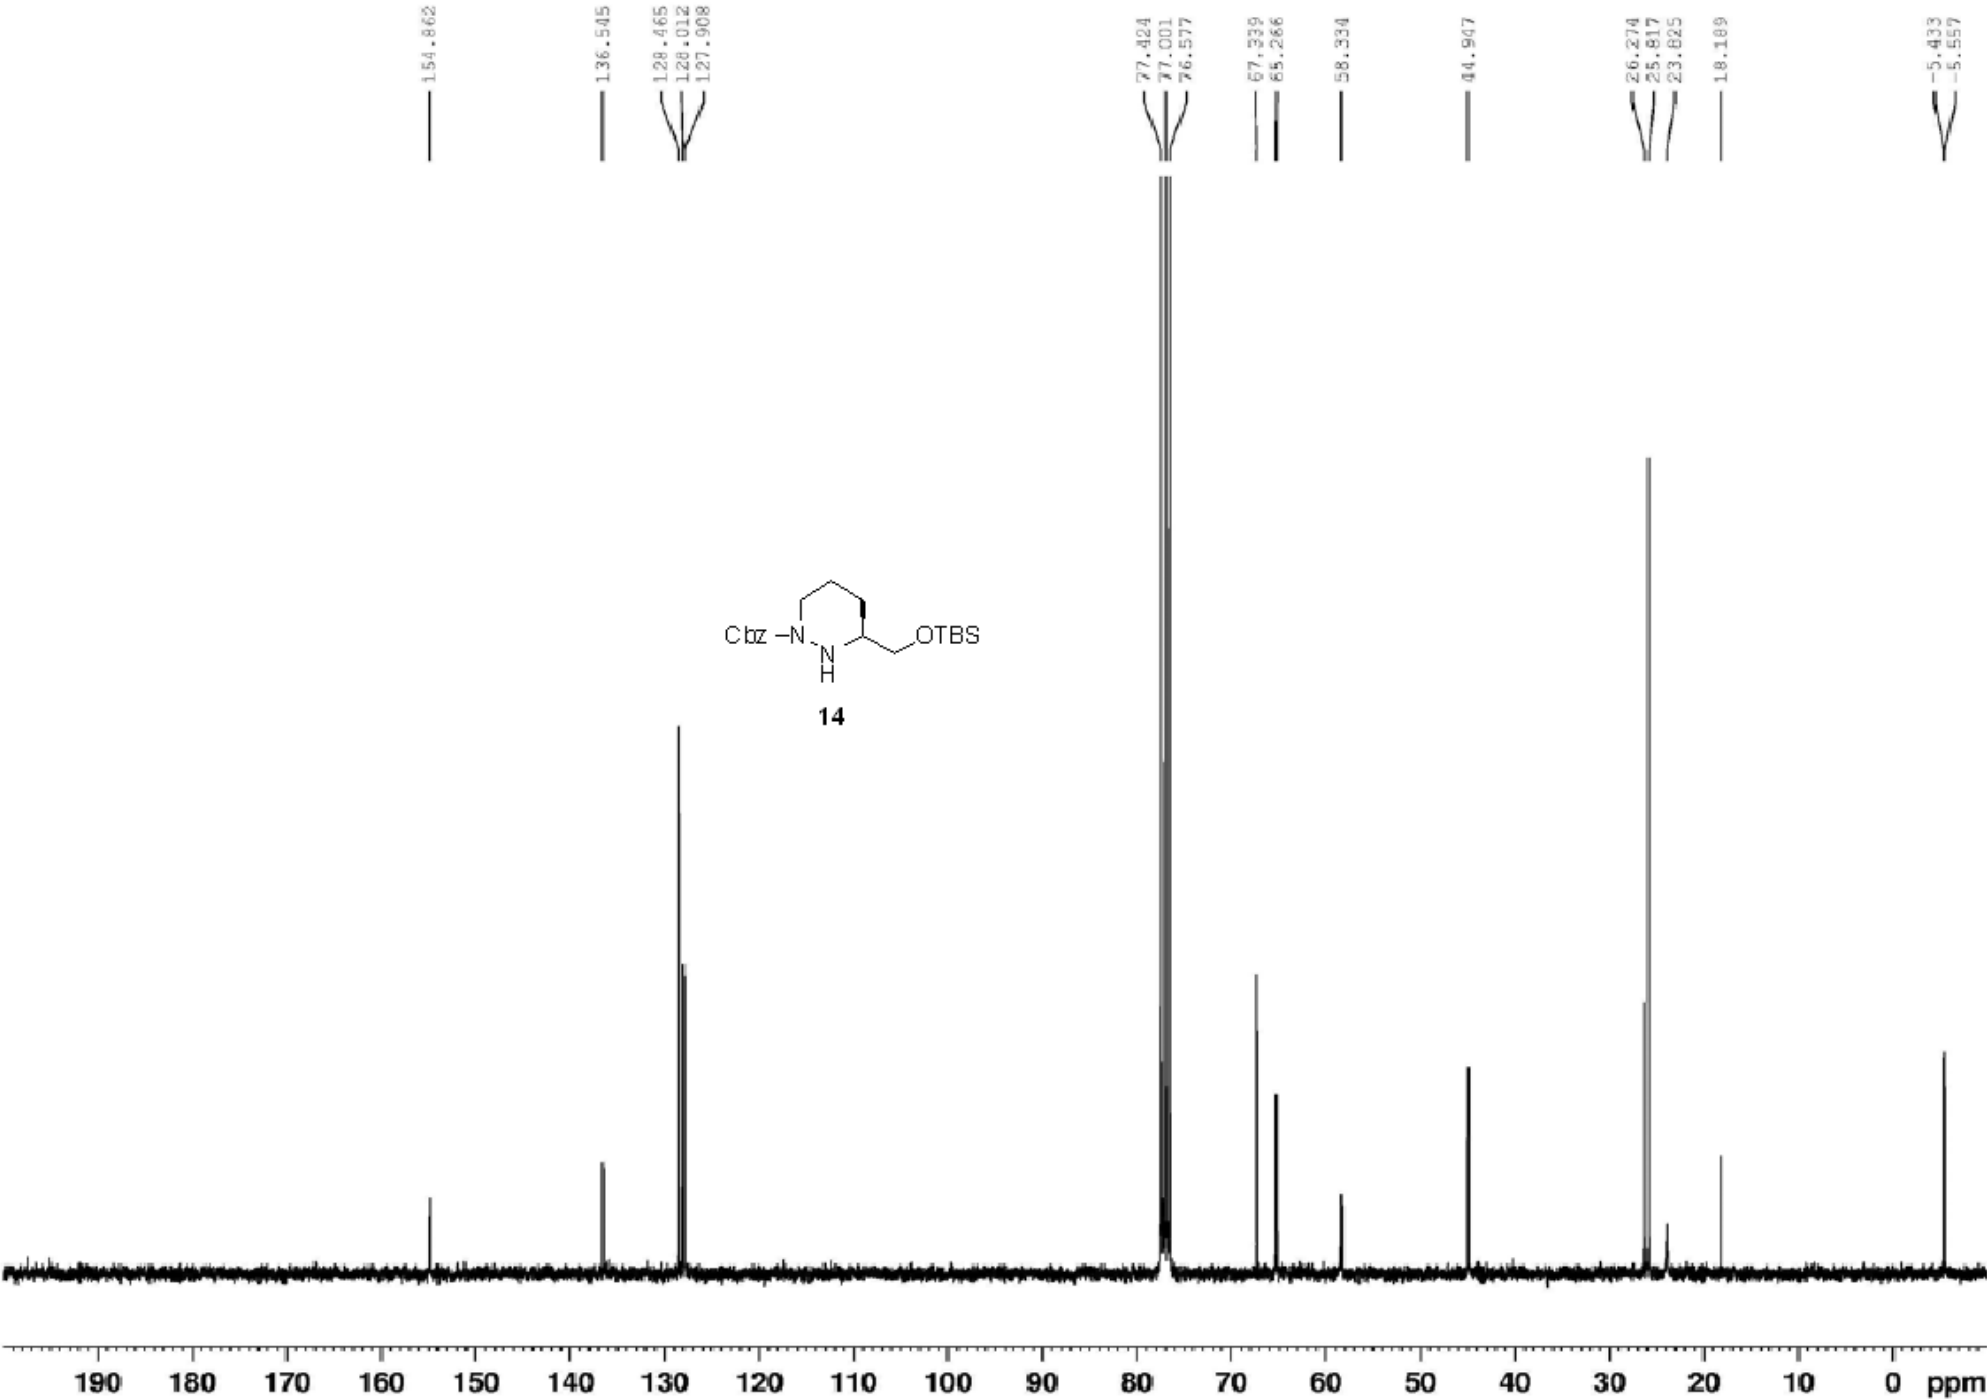

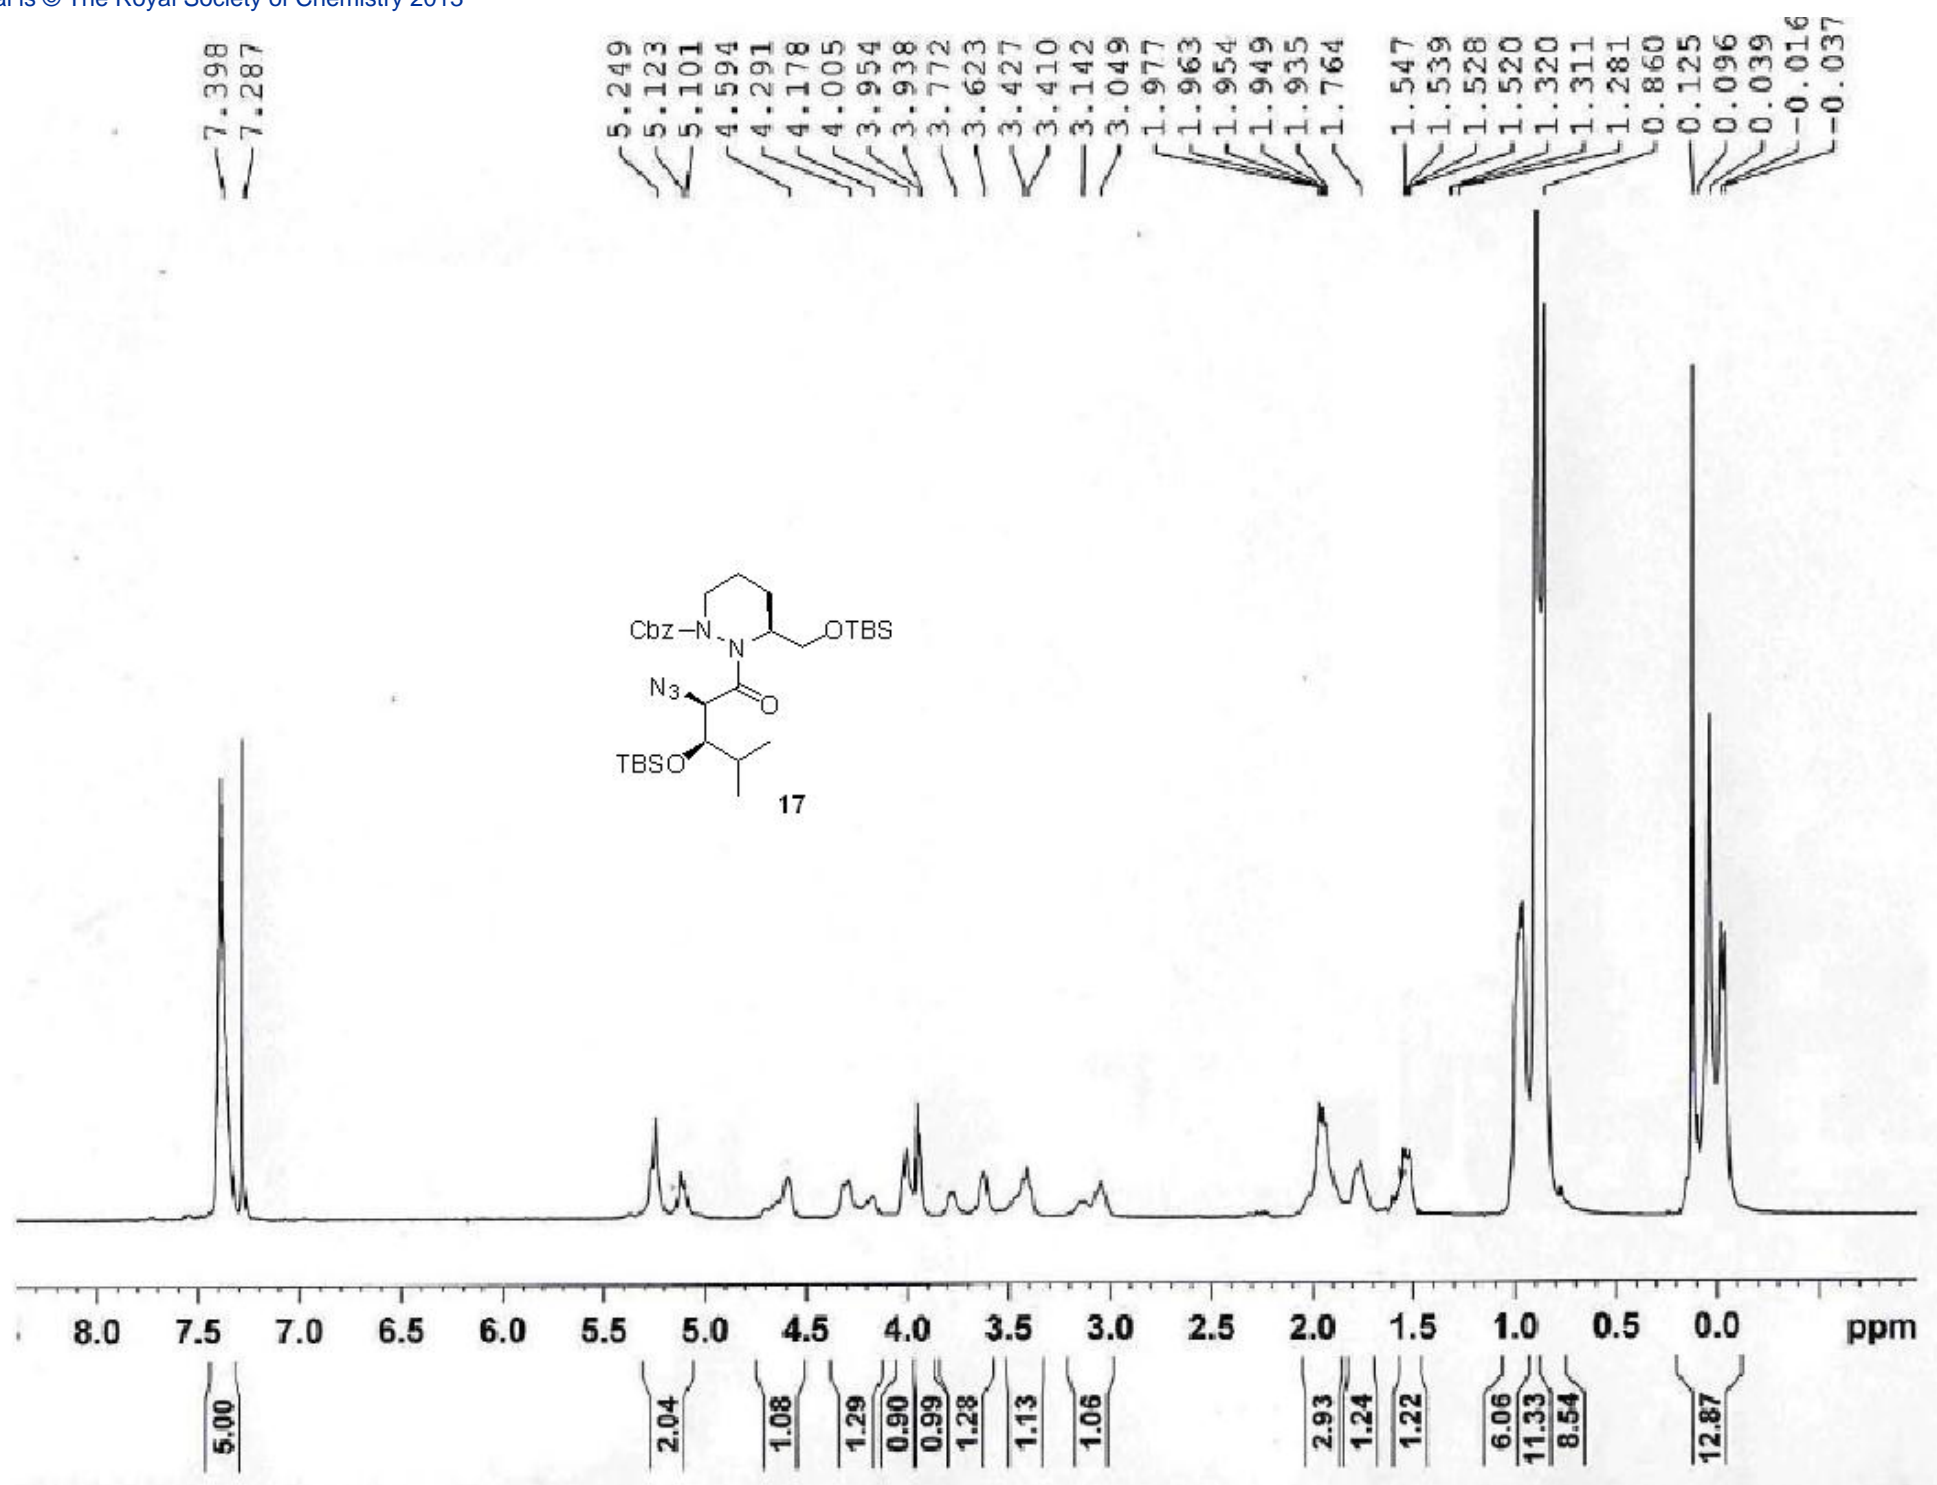

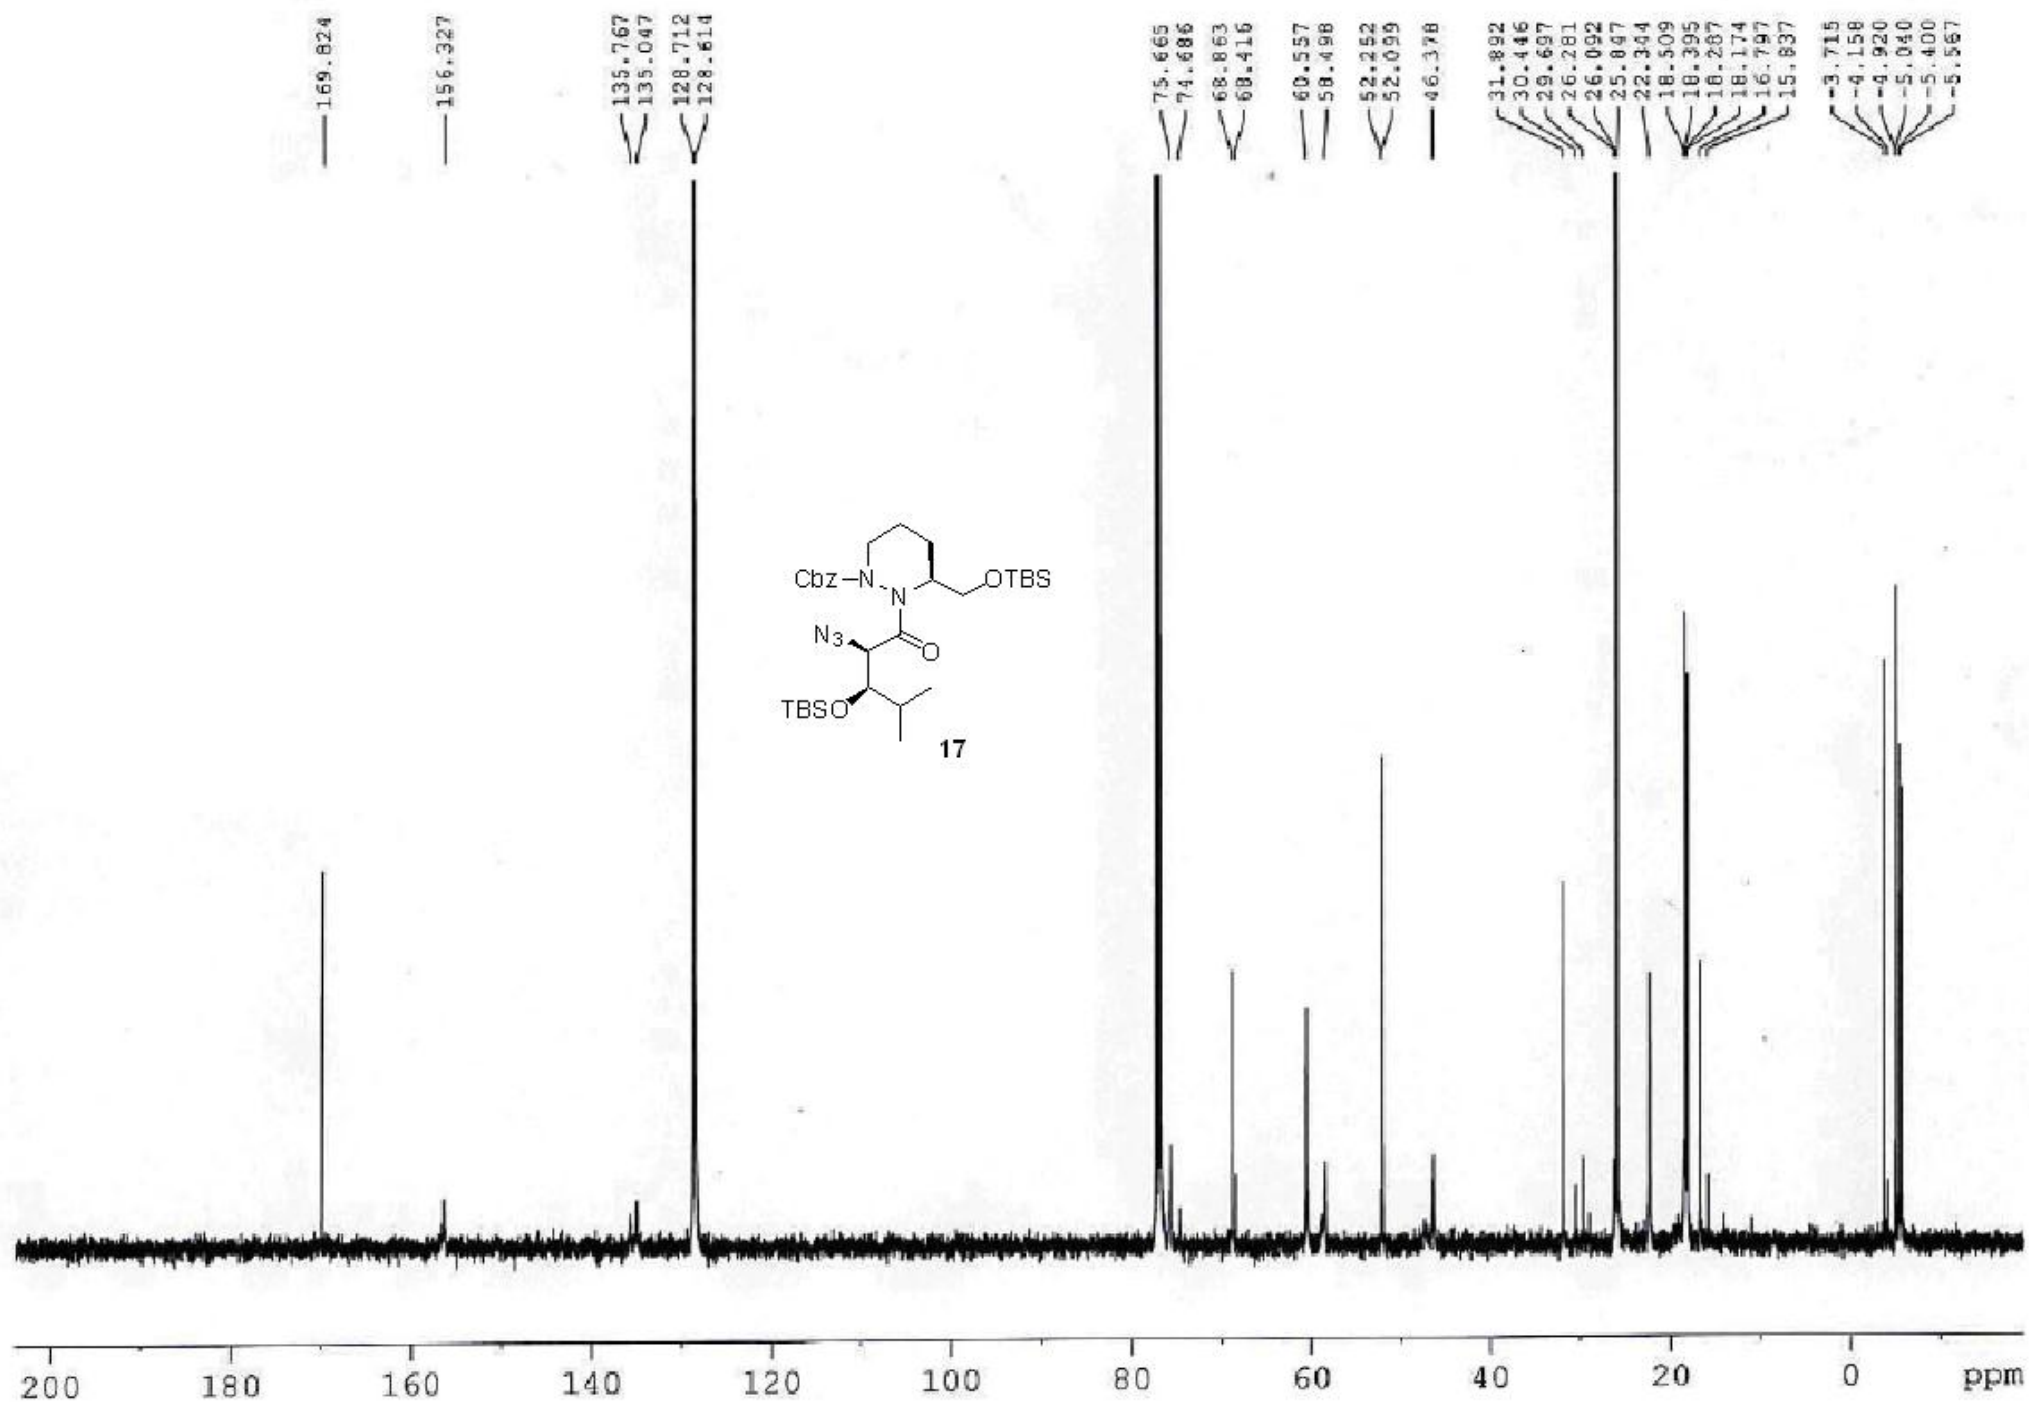

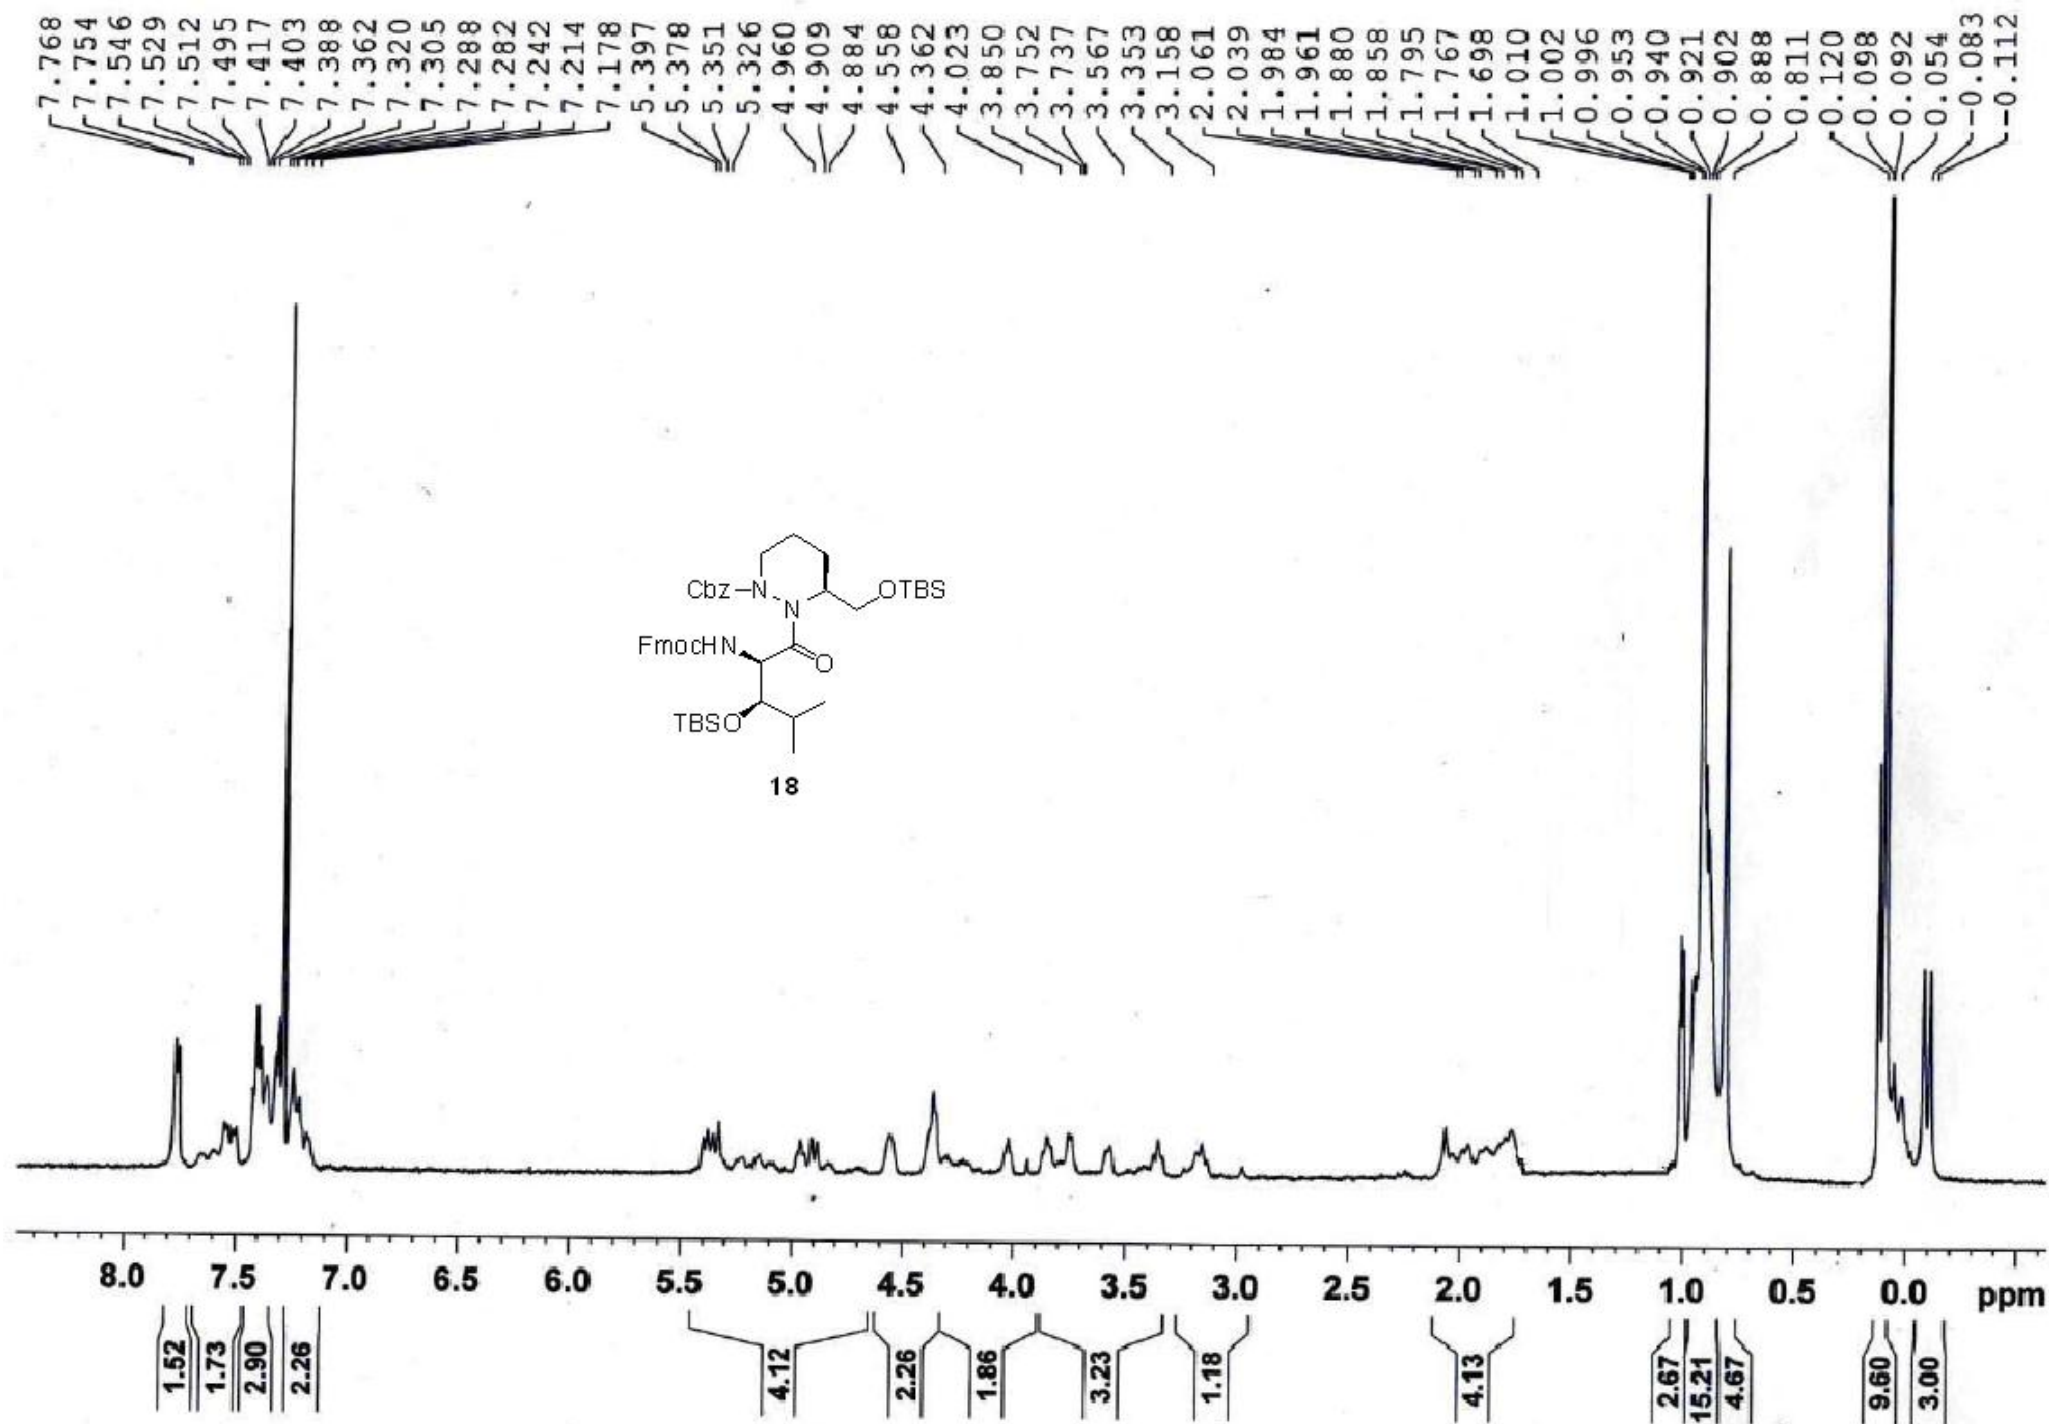

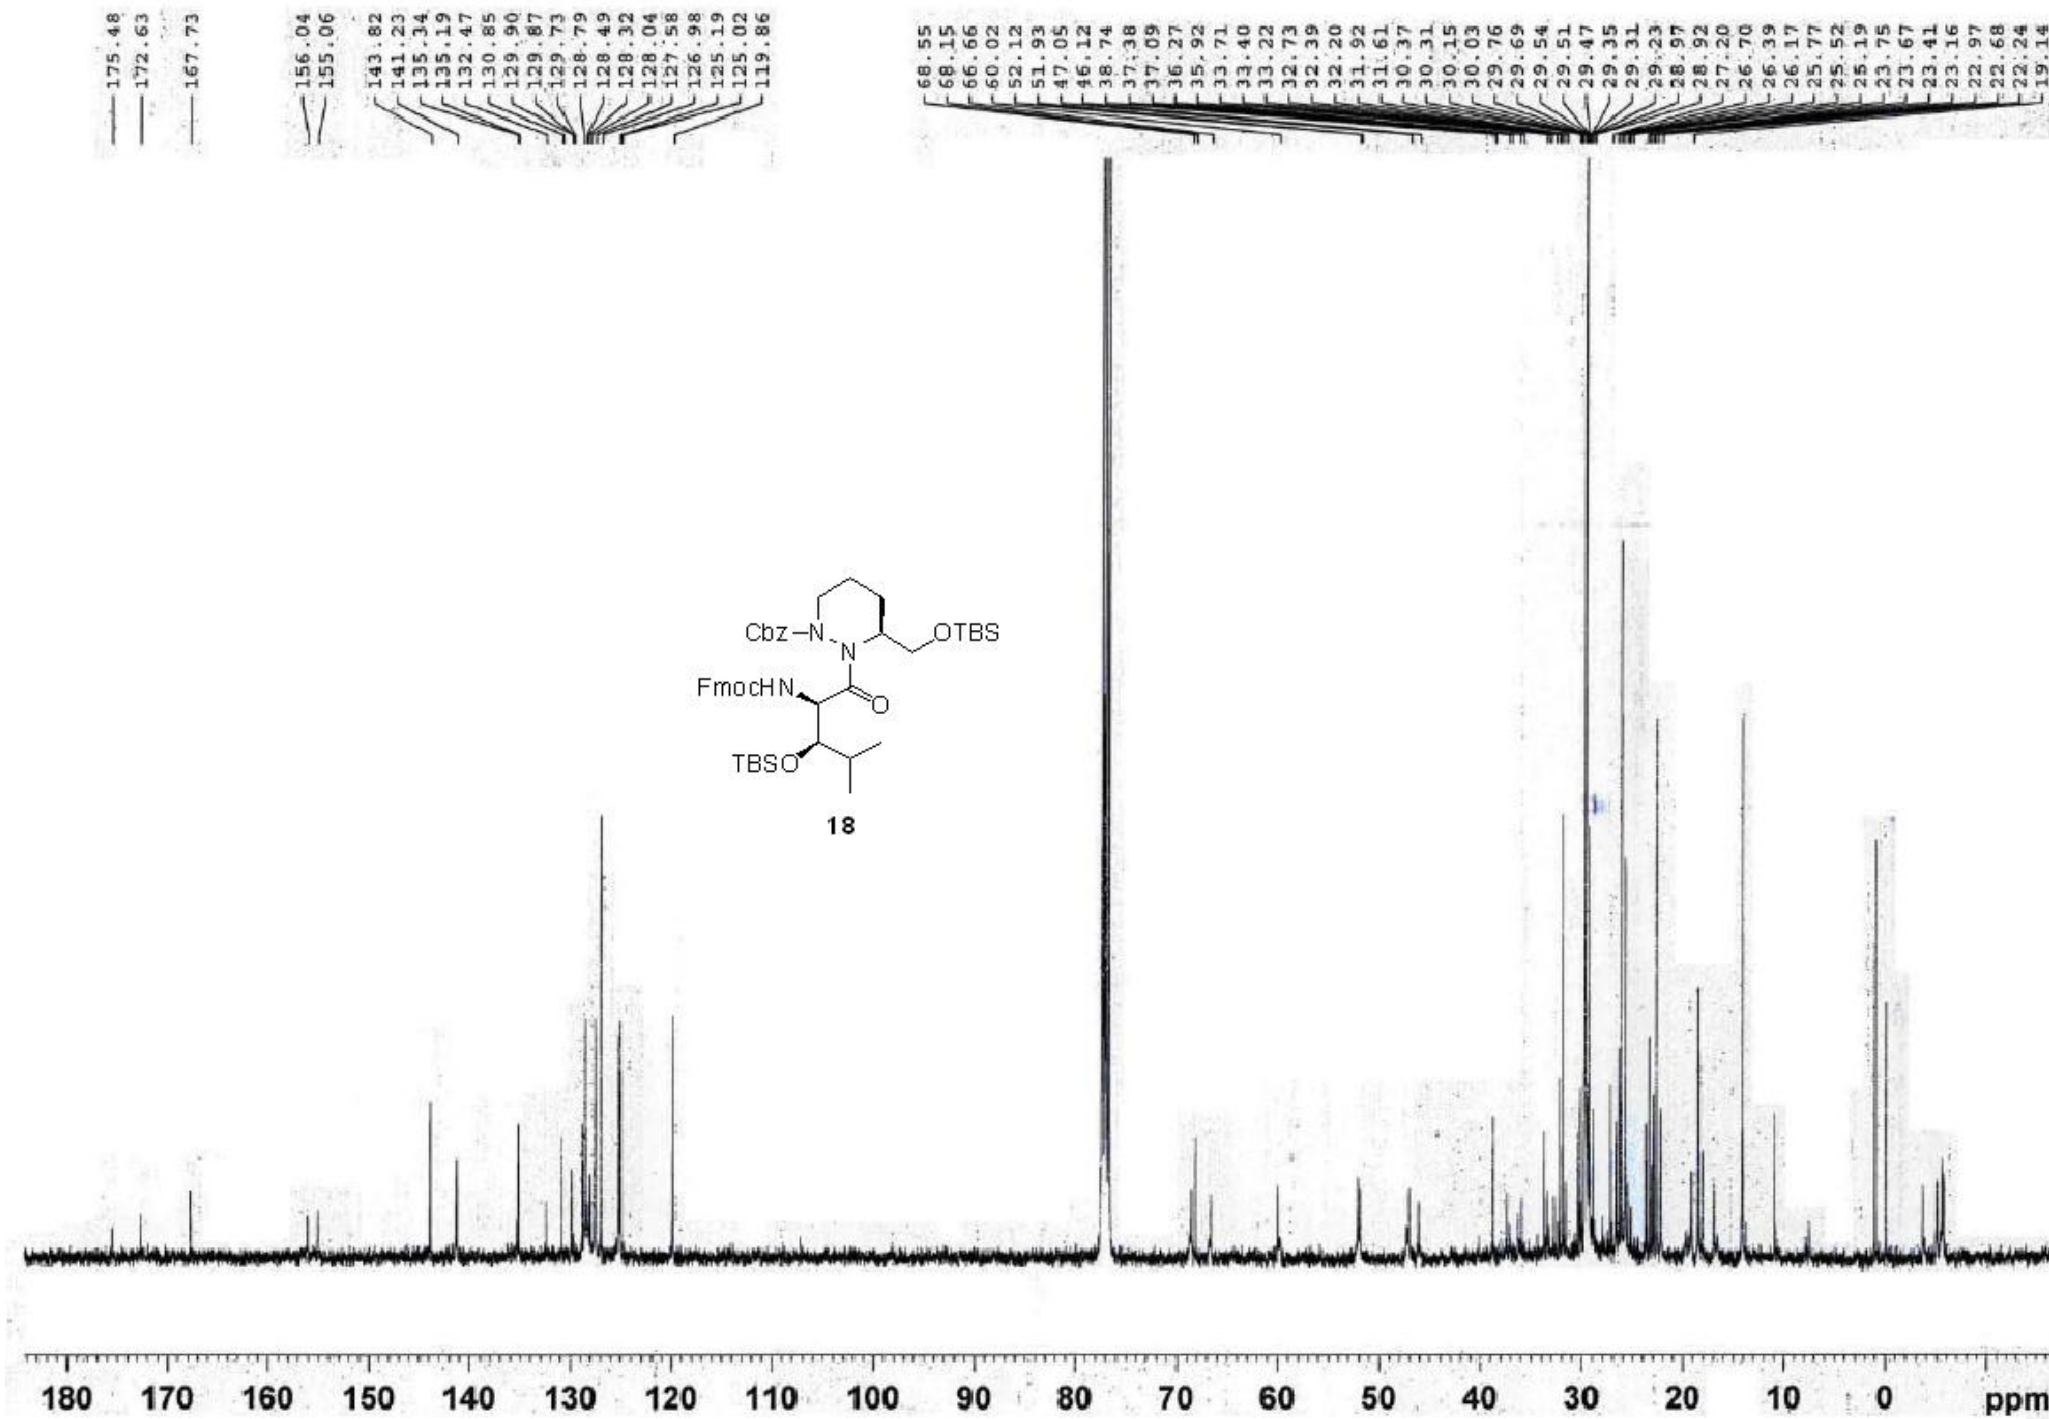



20120820-02

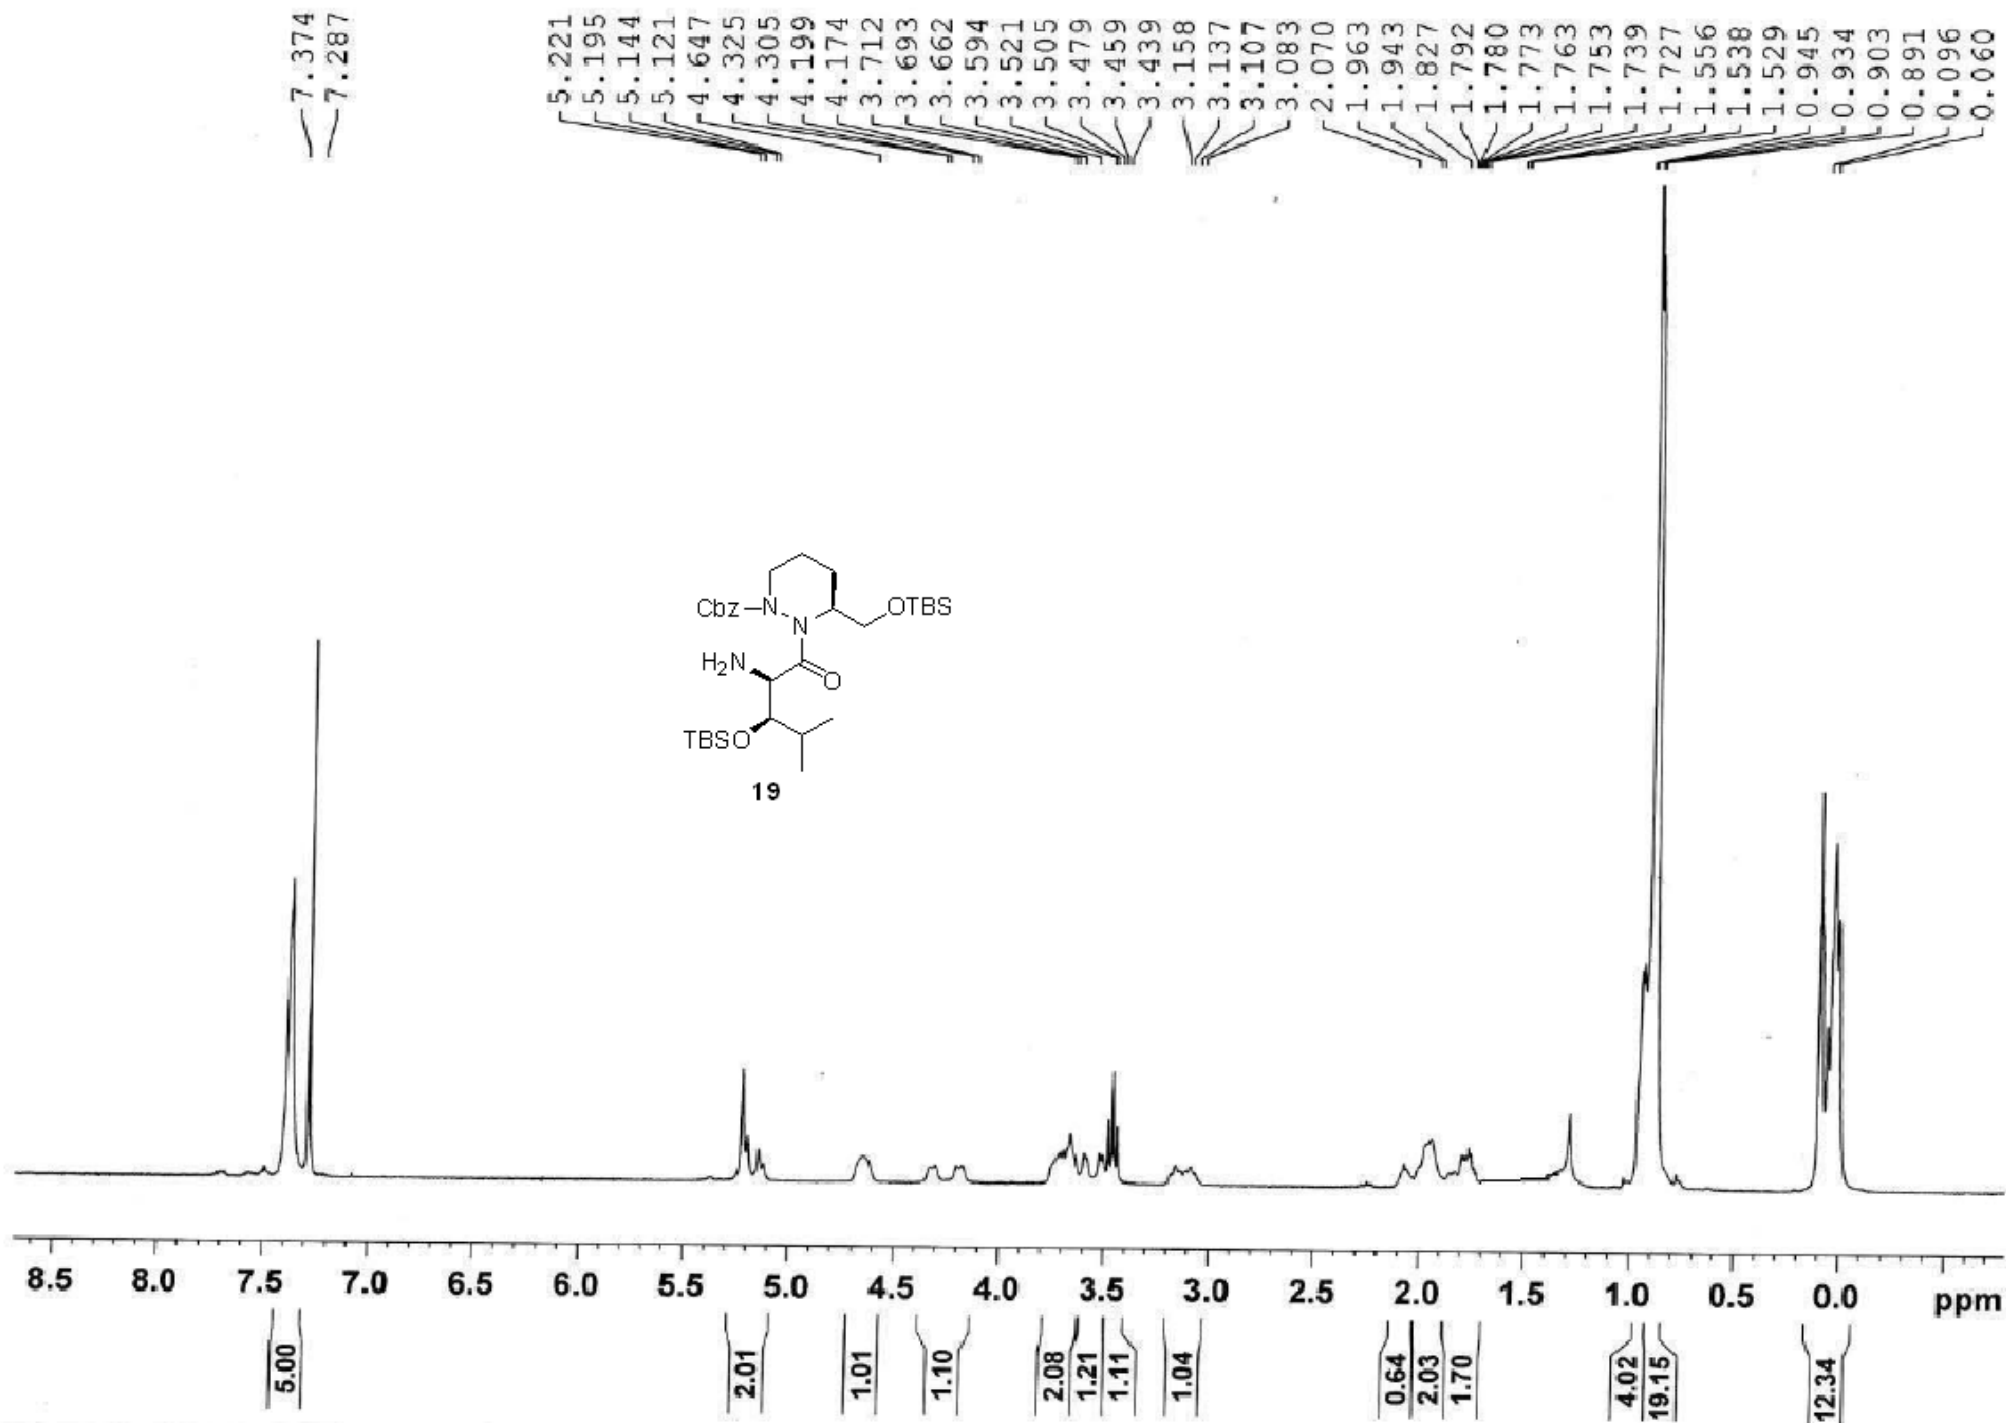

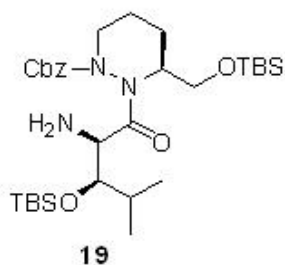

20120821-01

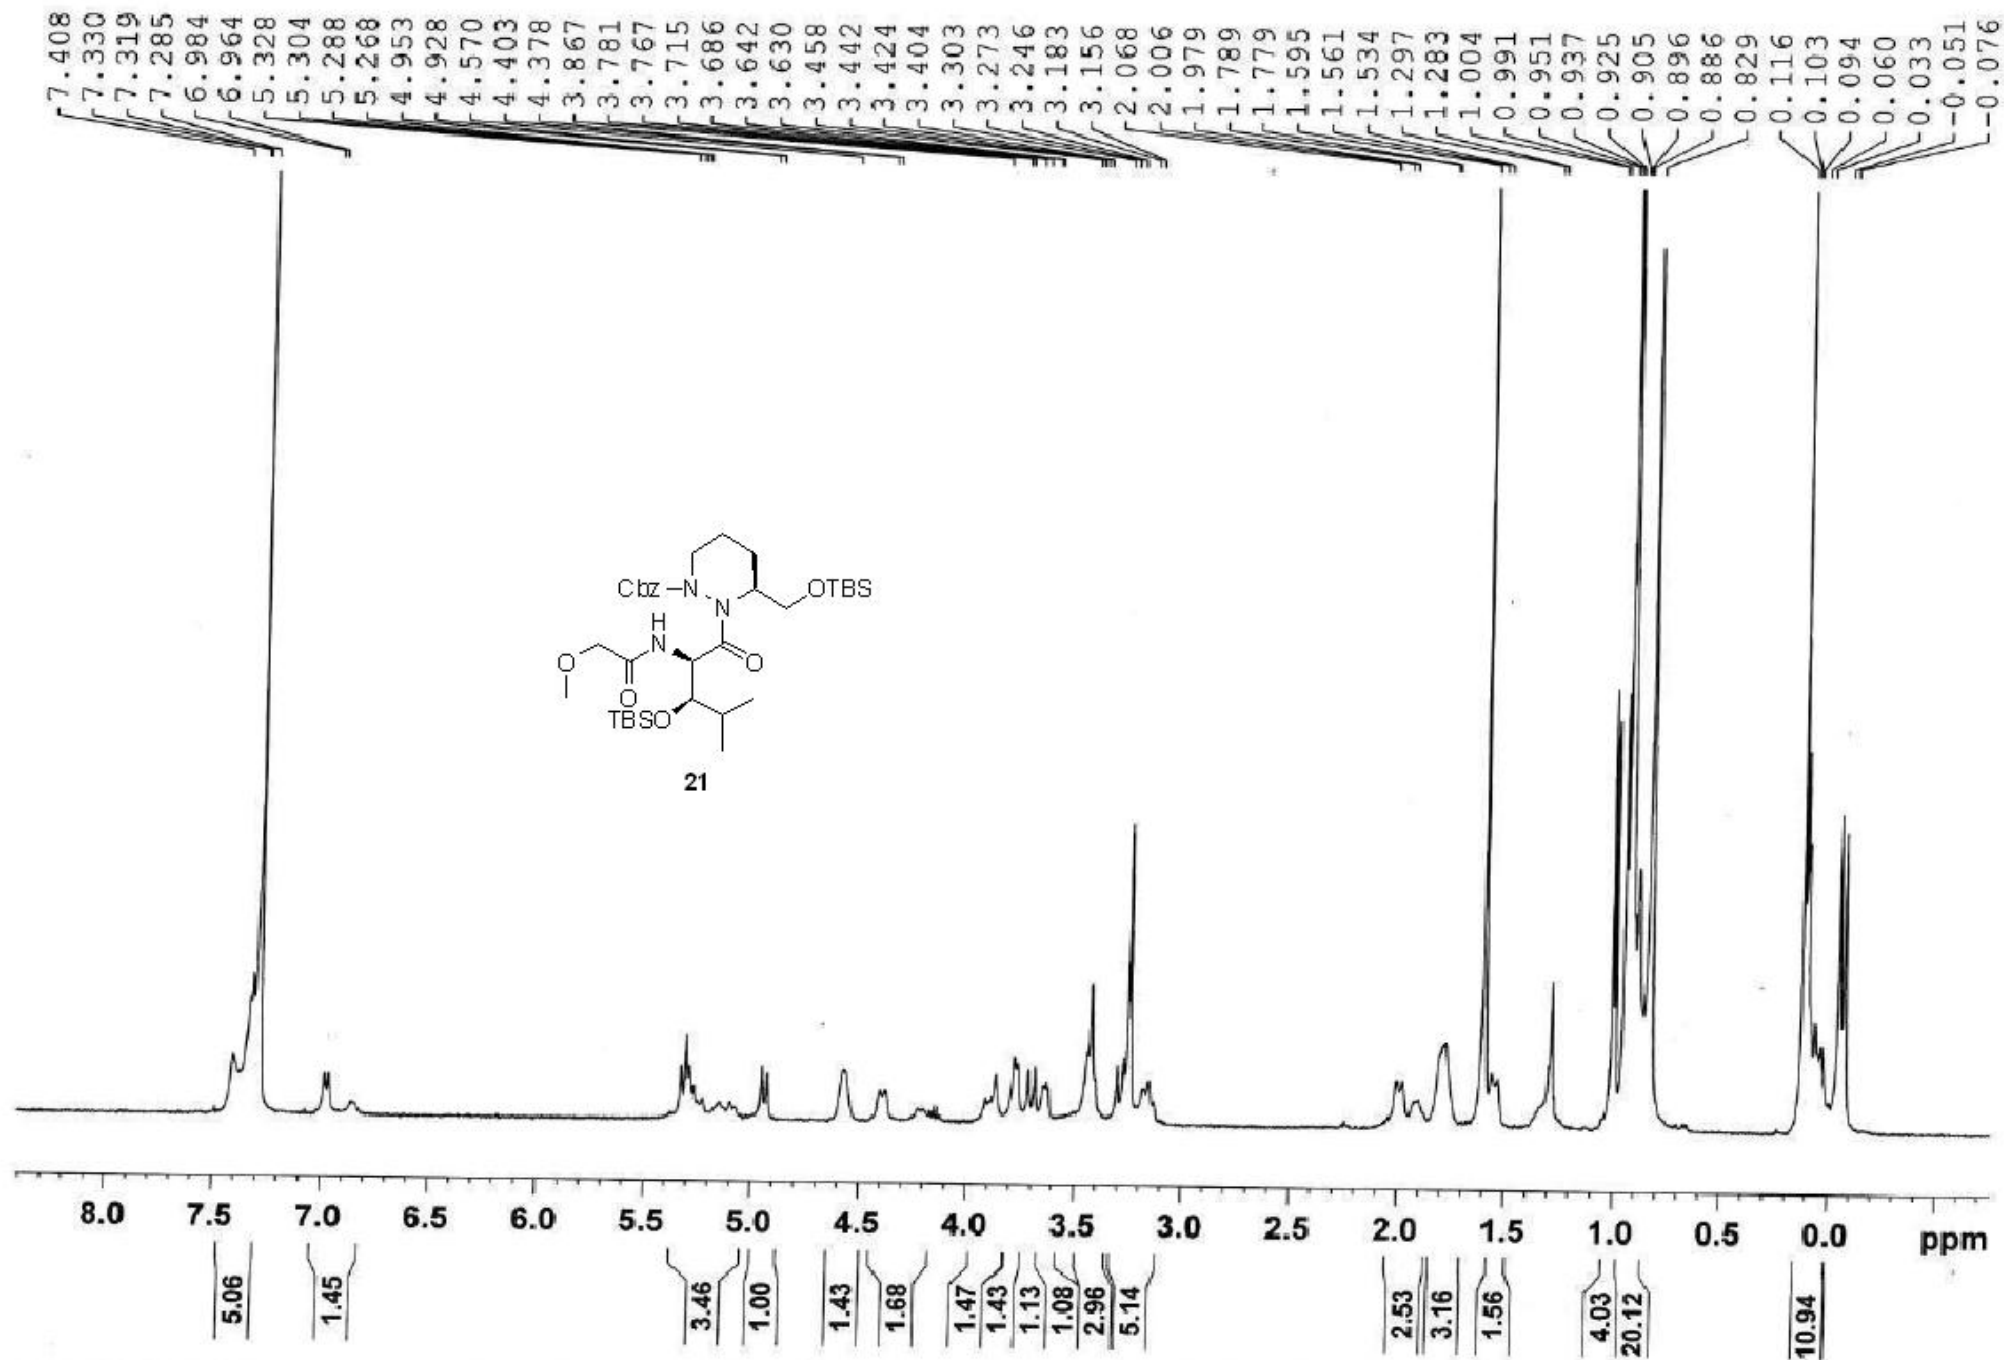



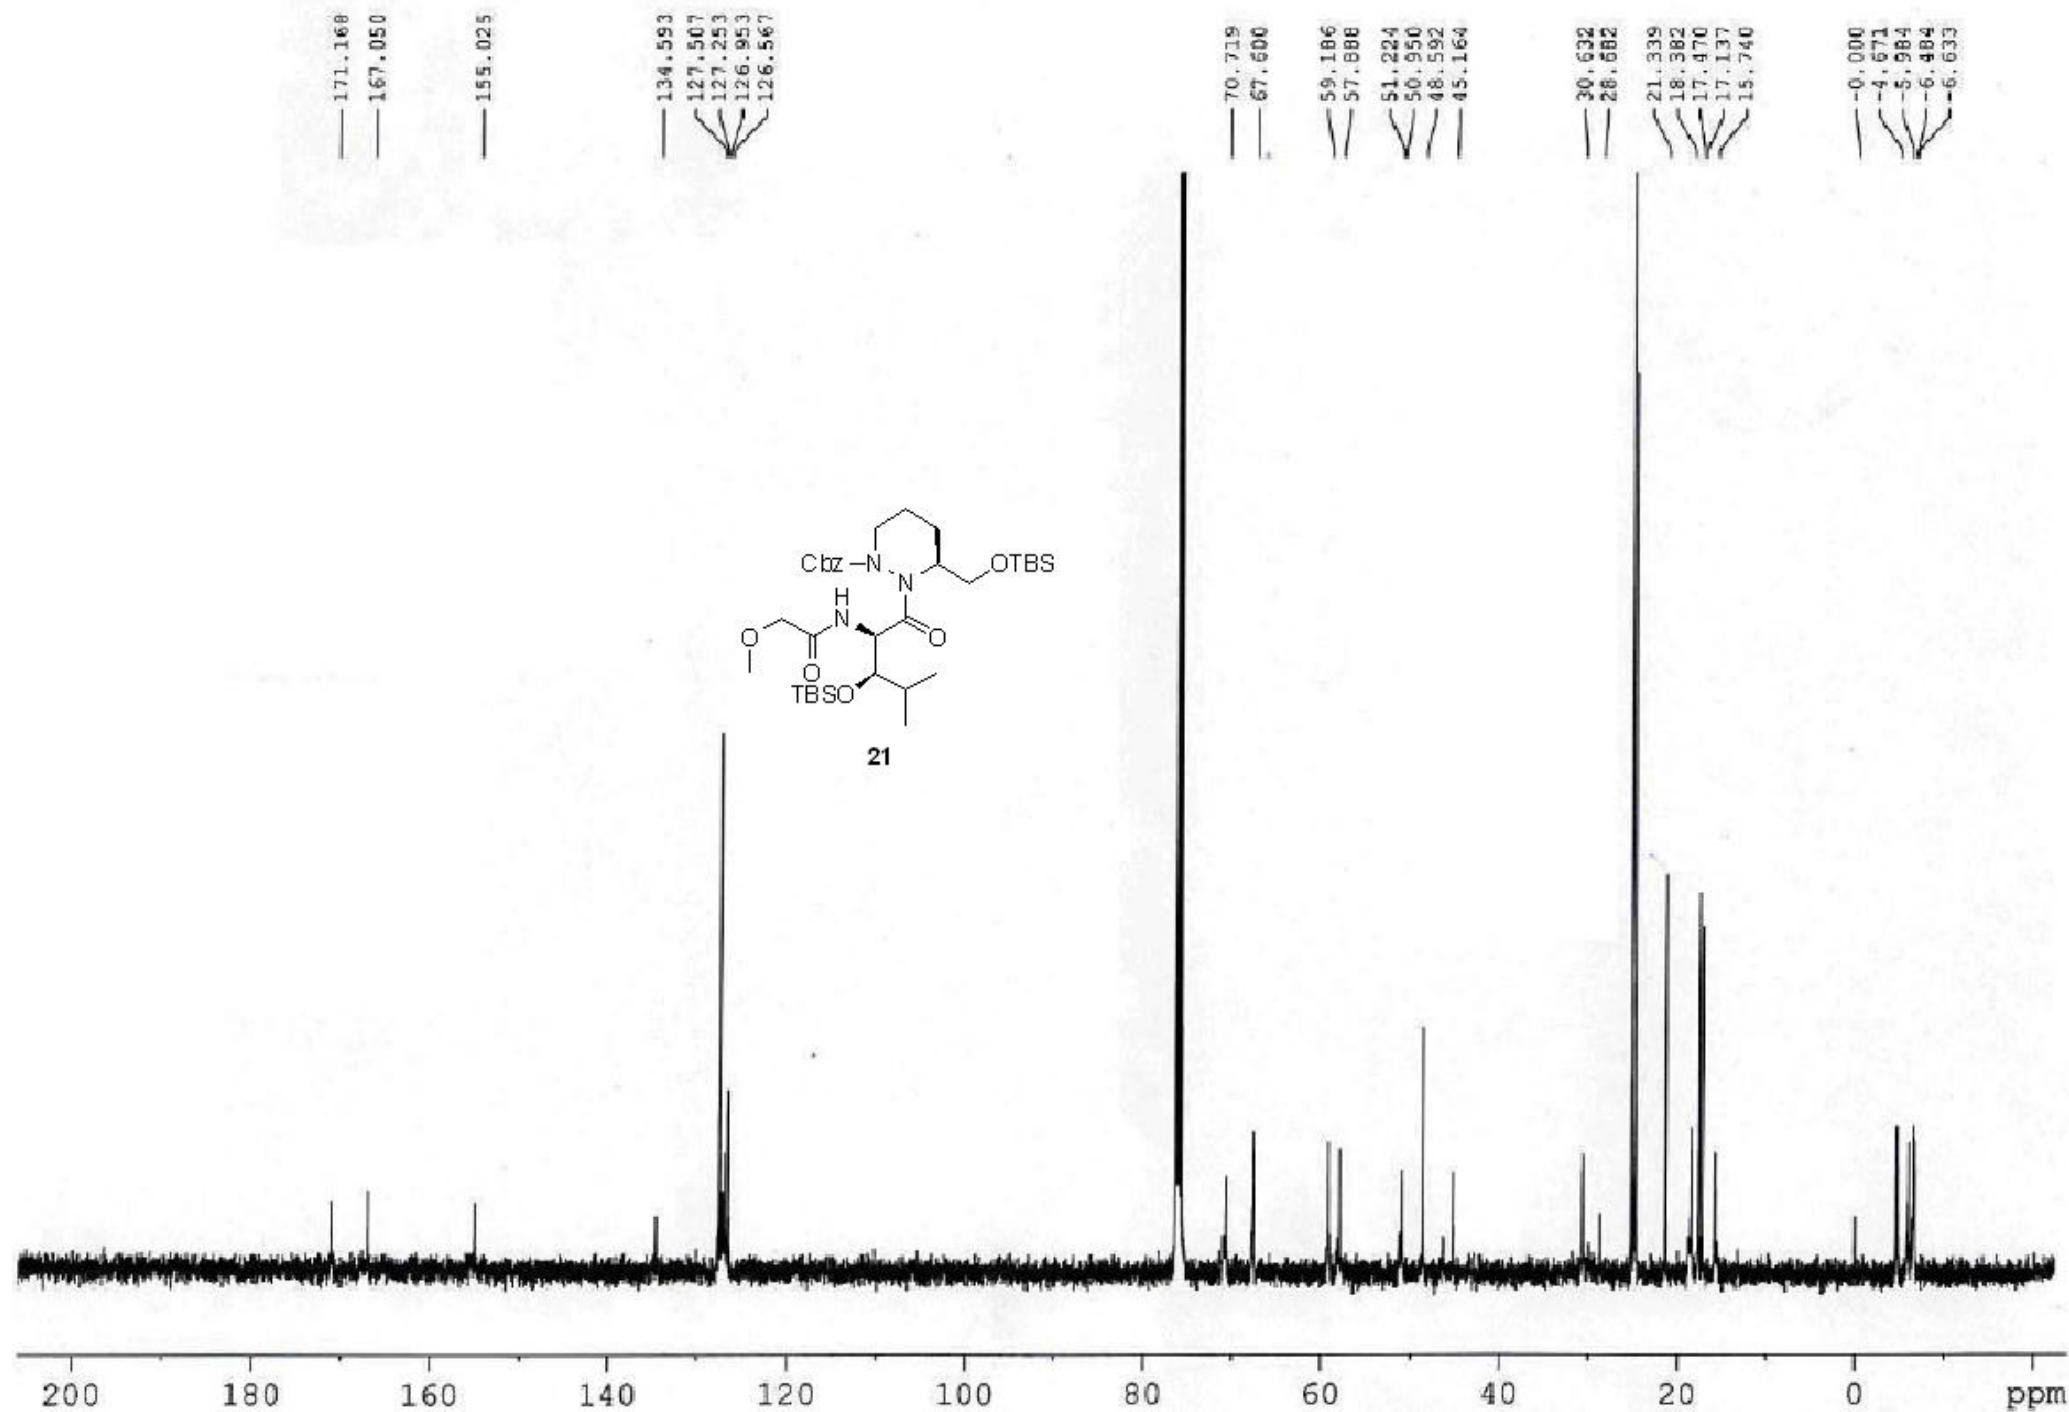

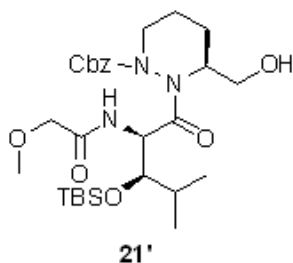

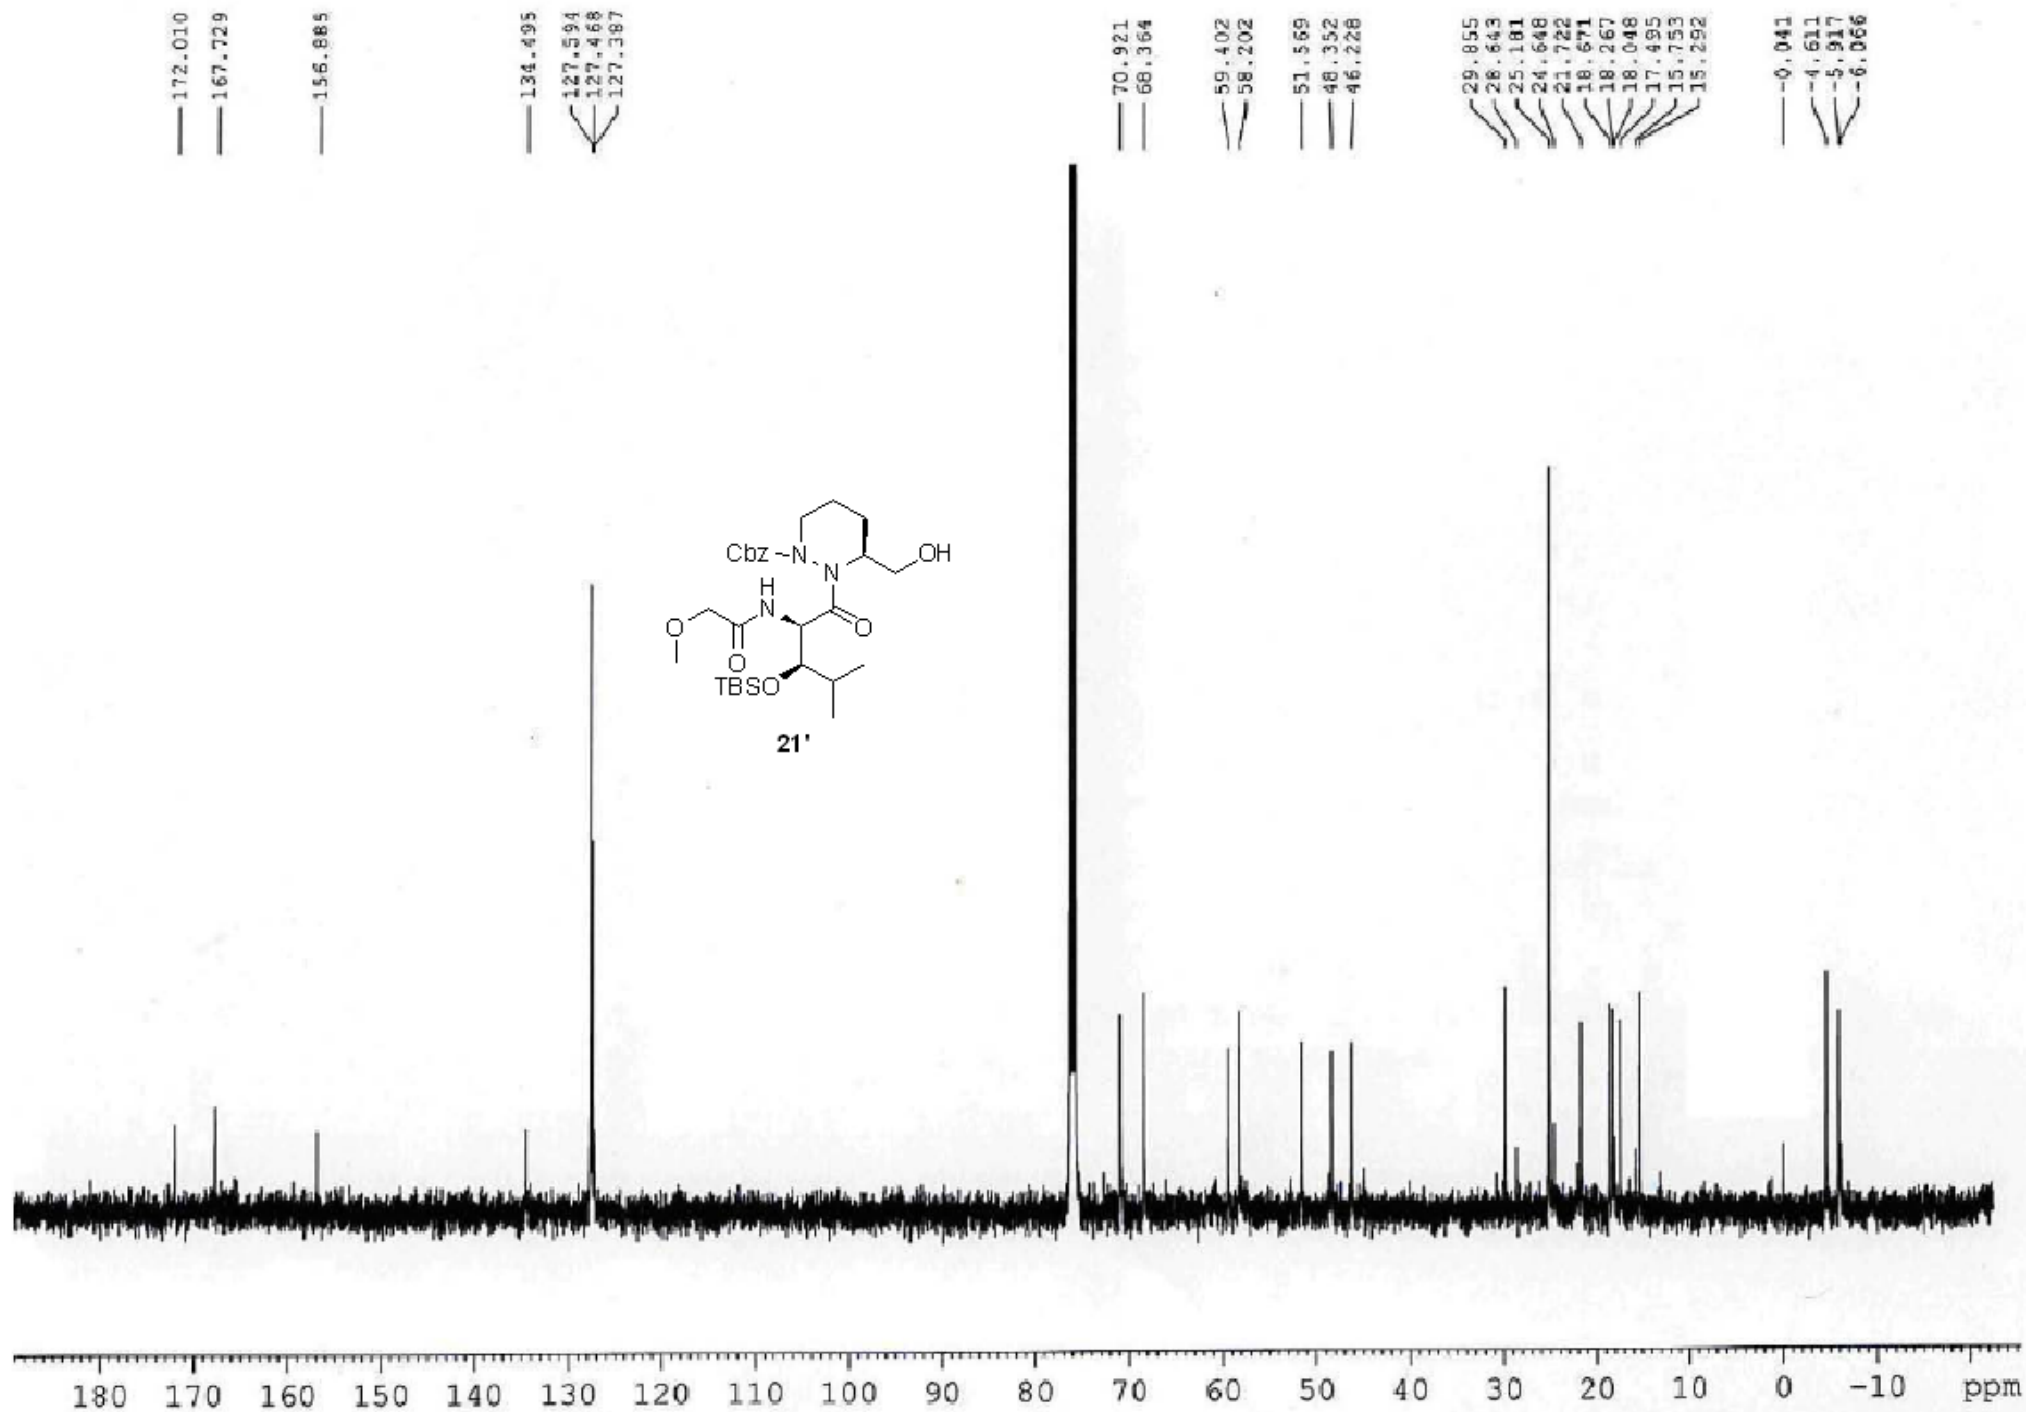



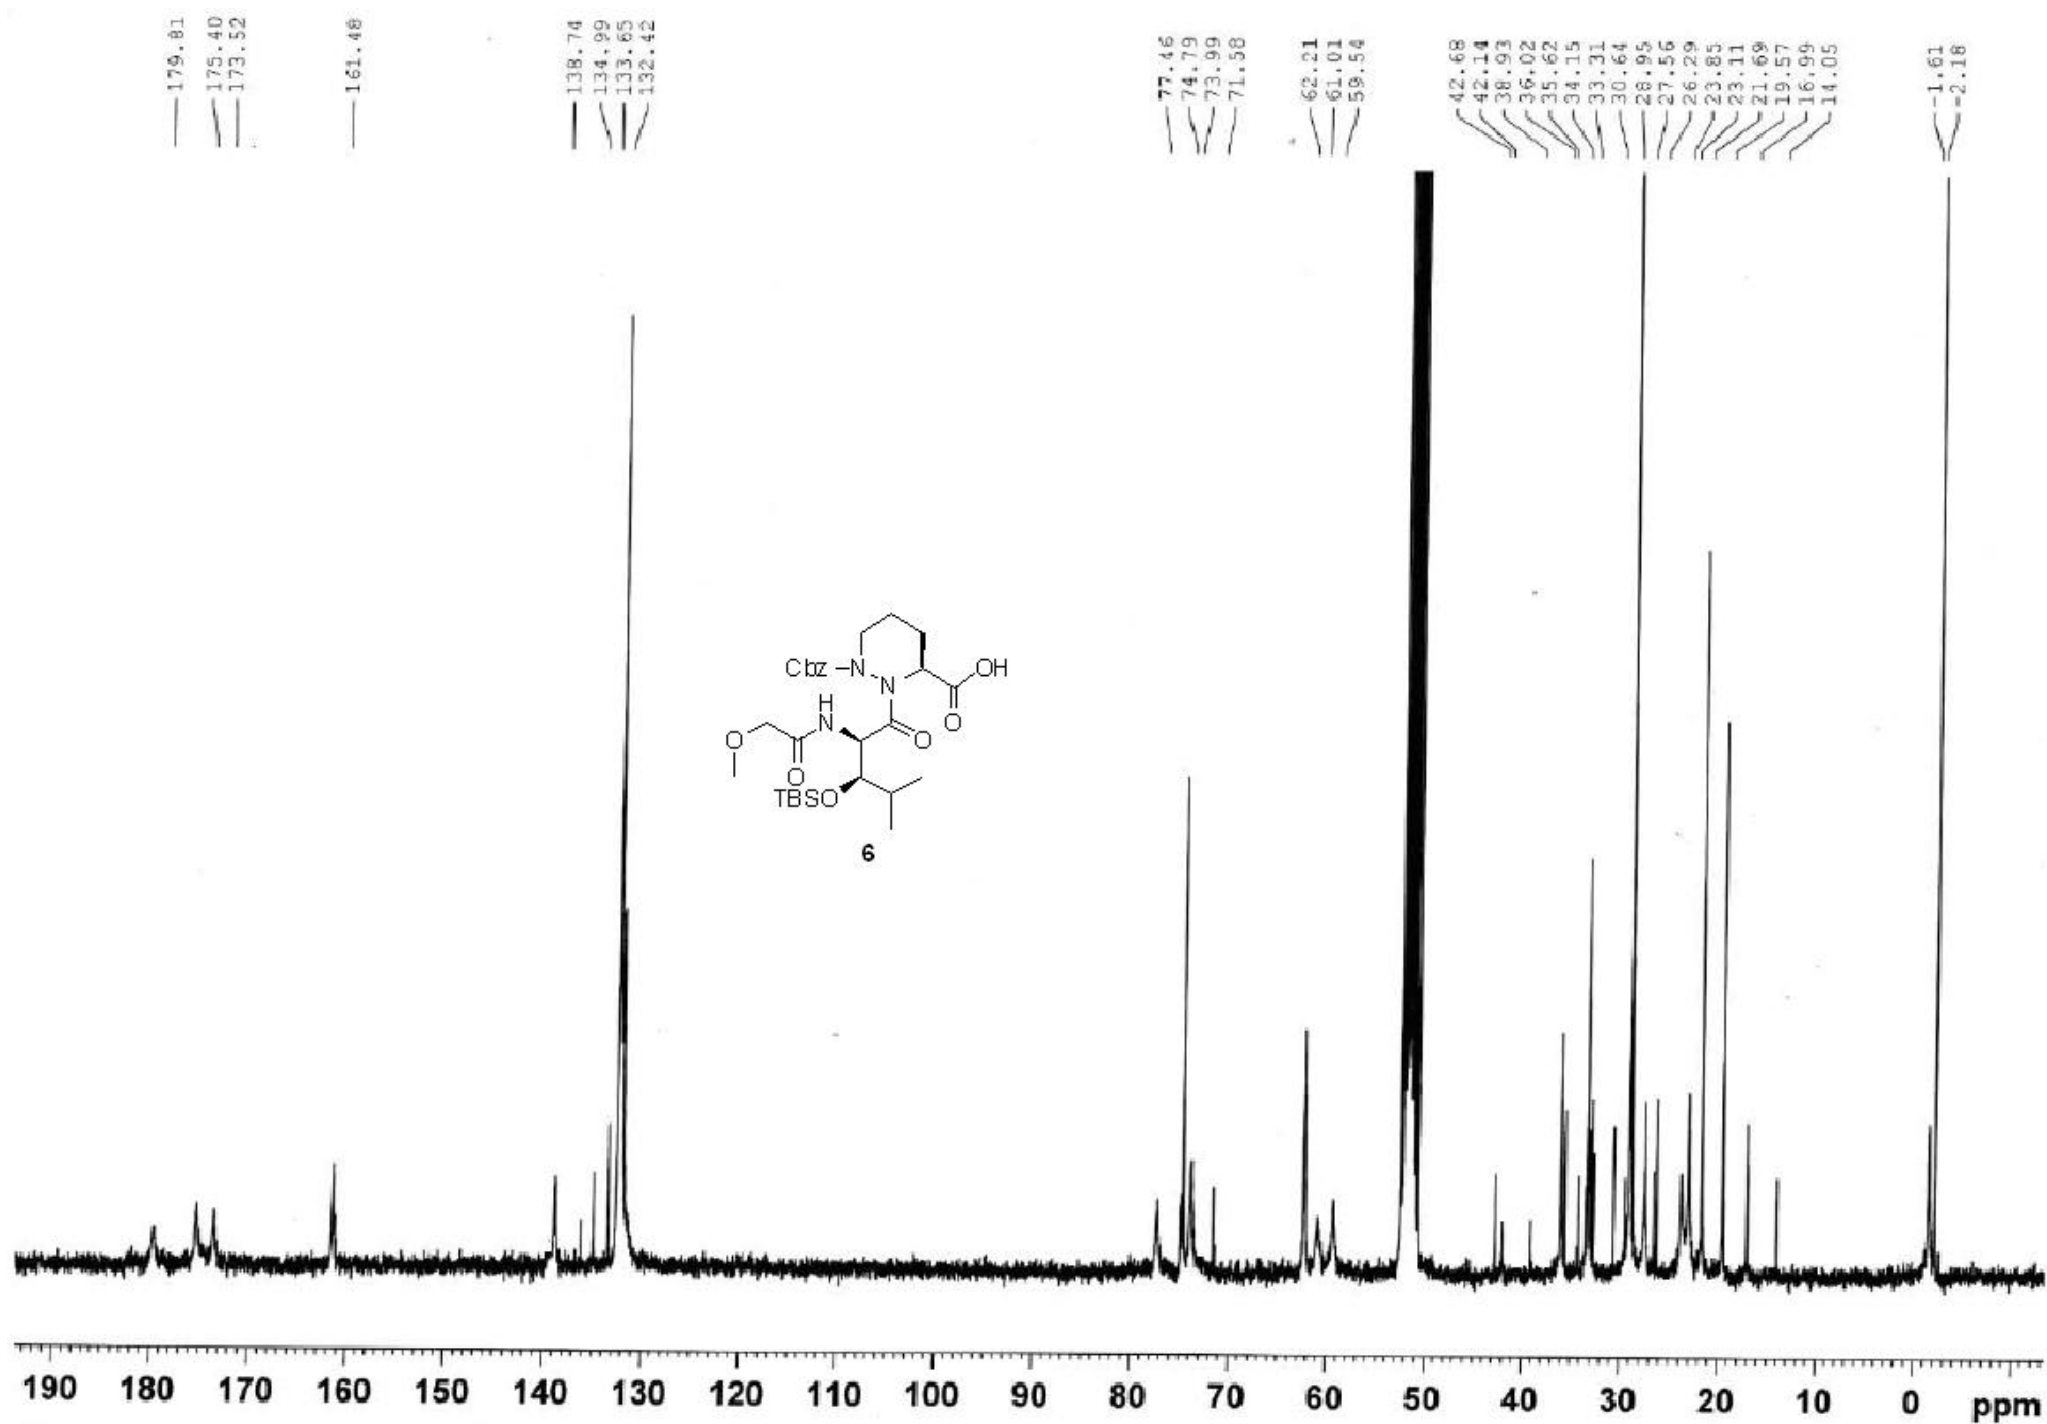

20120531-01

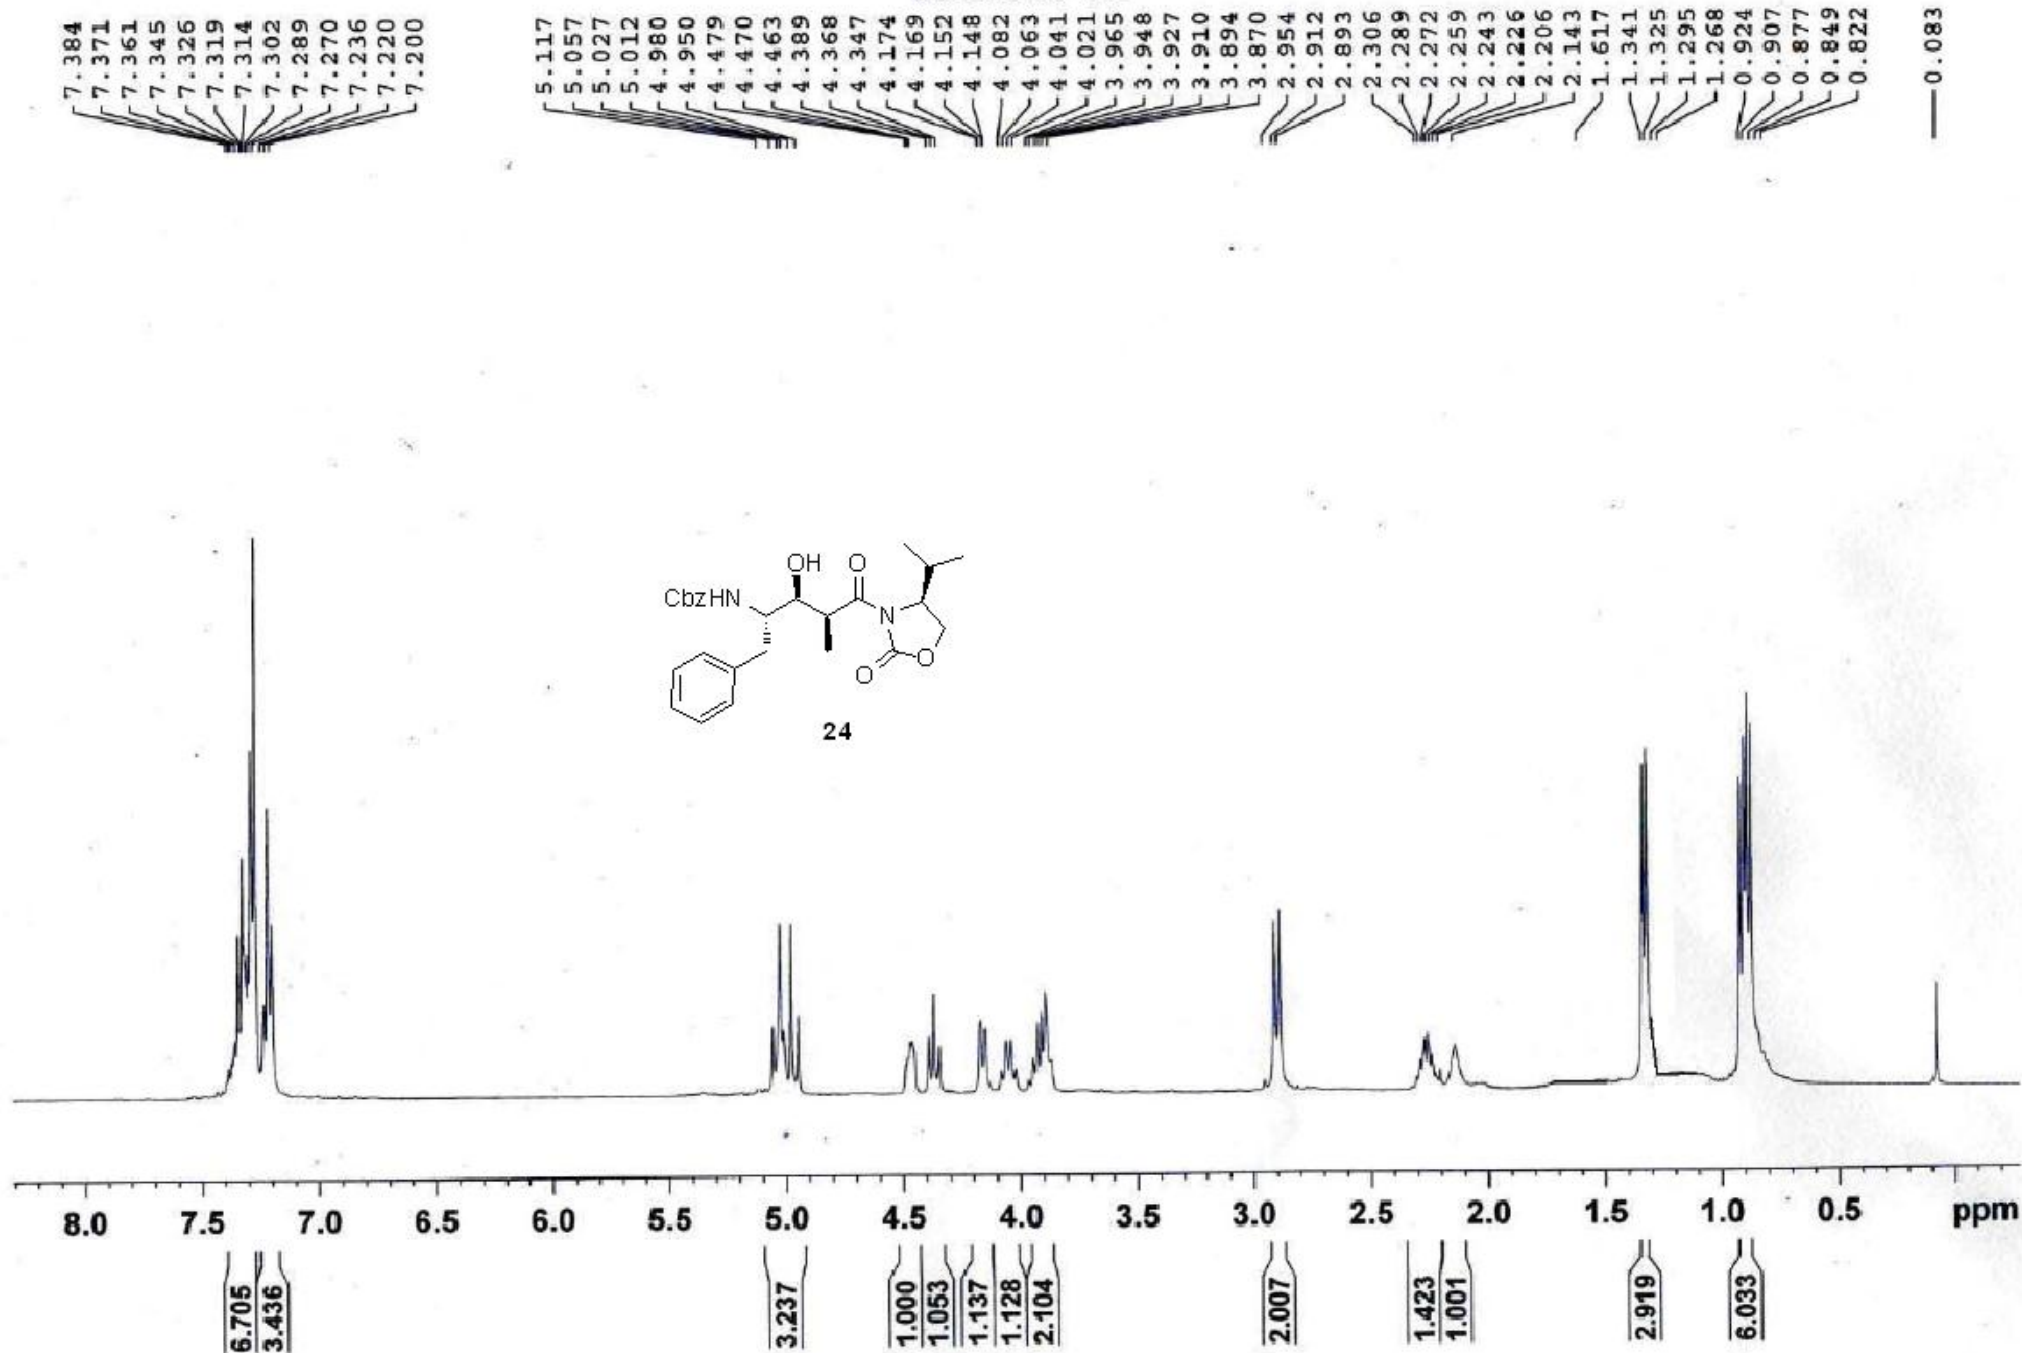



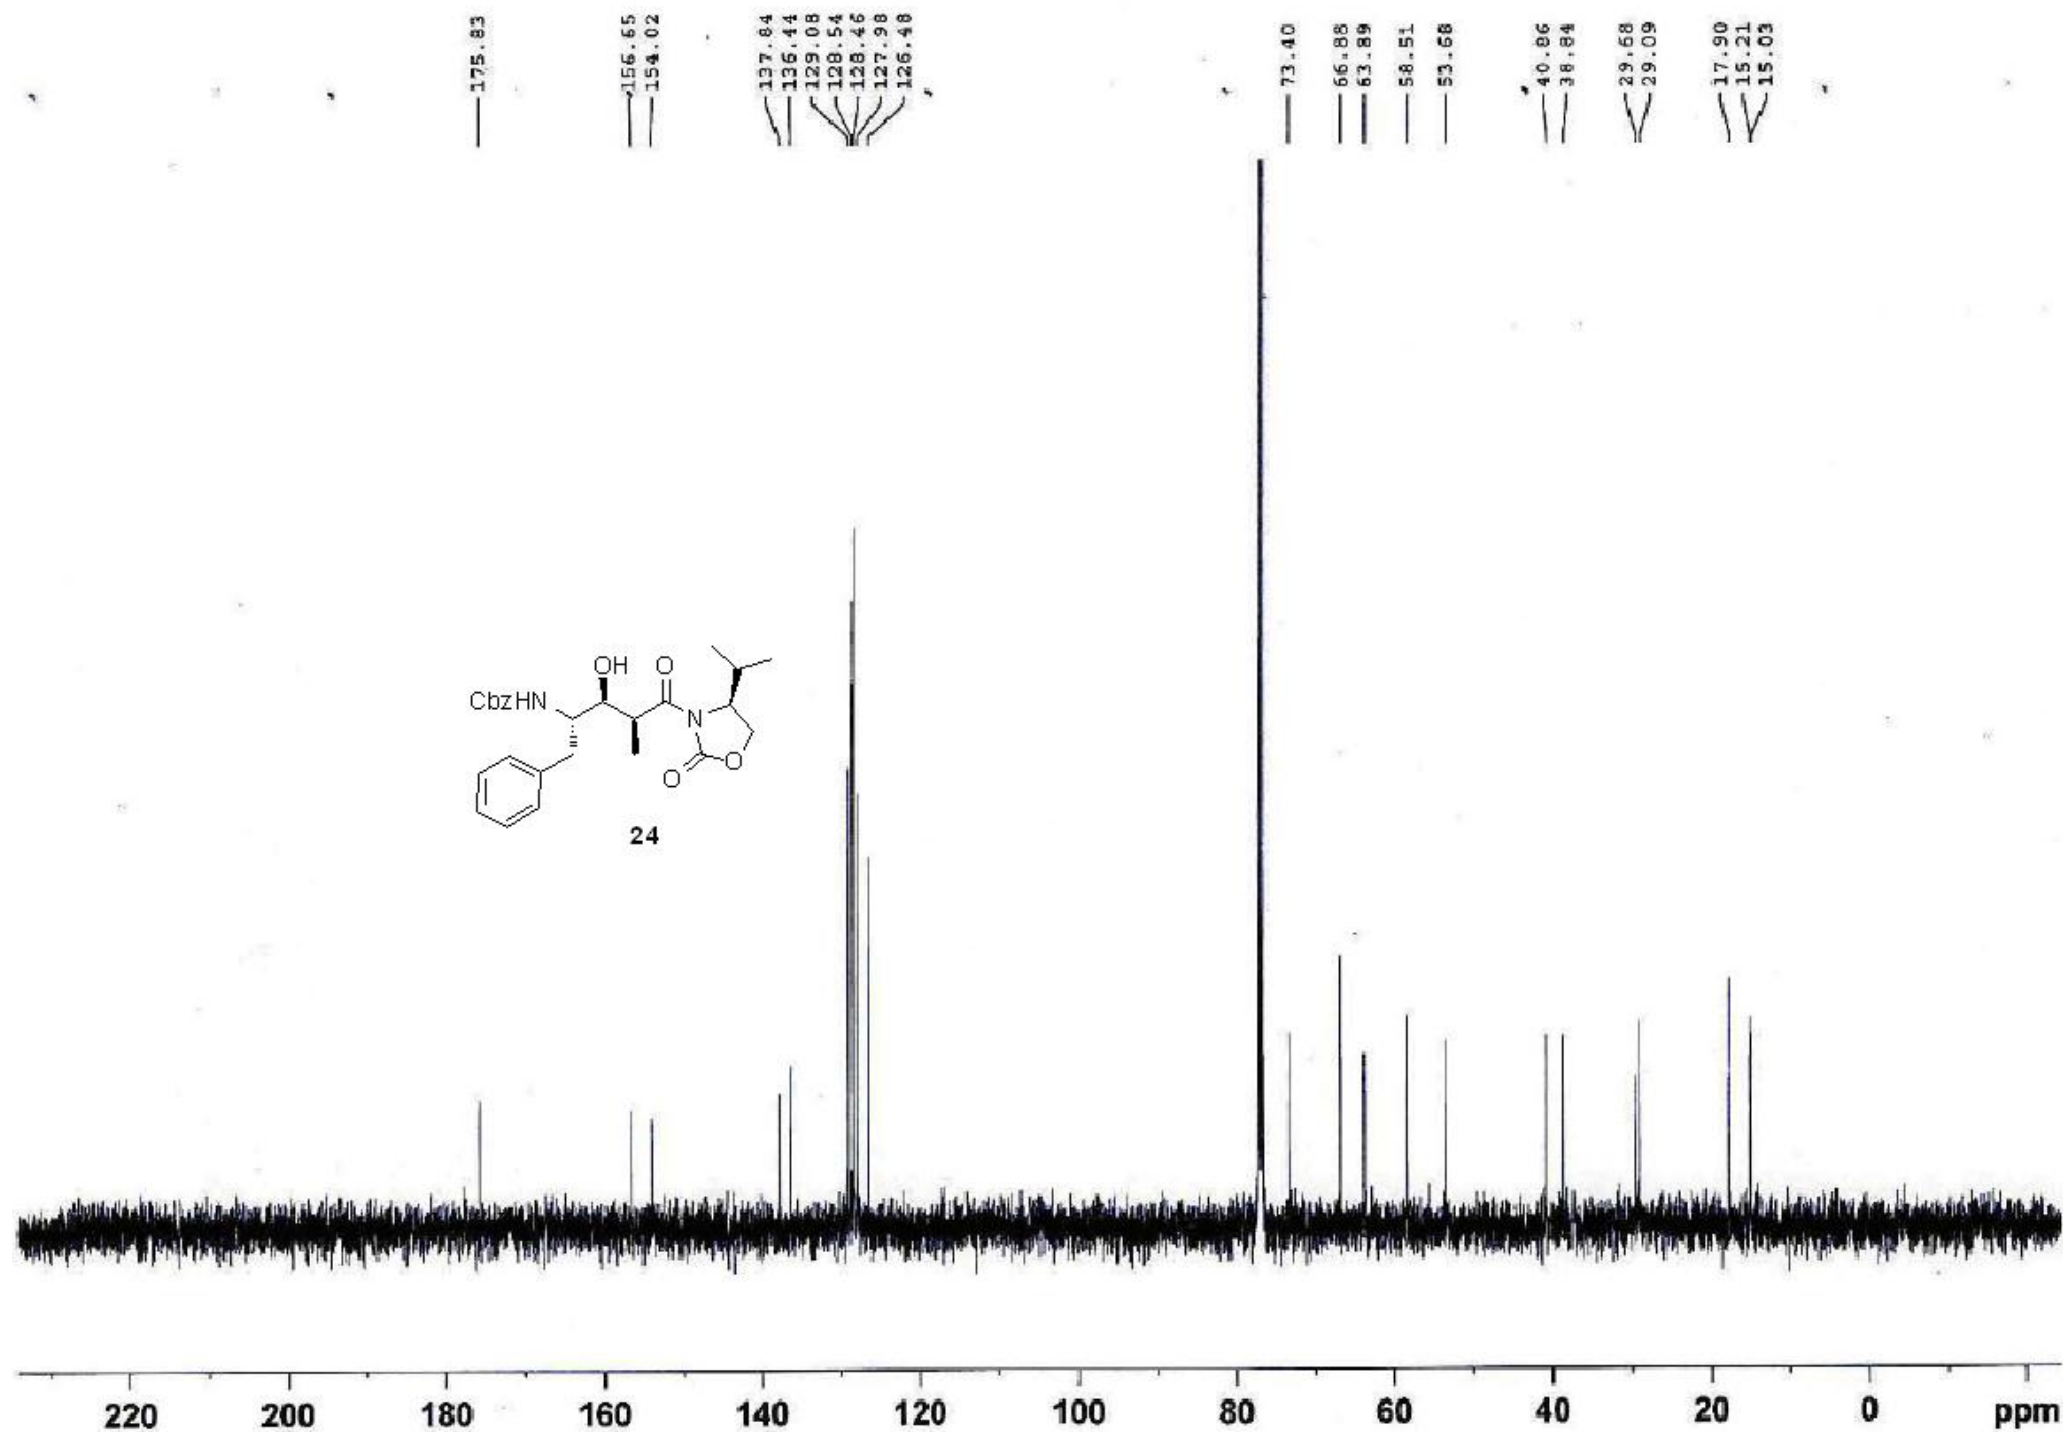

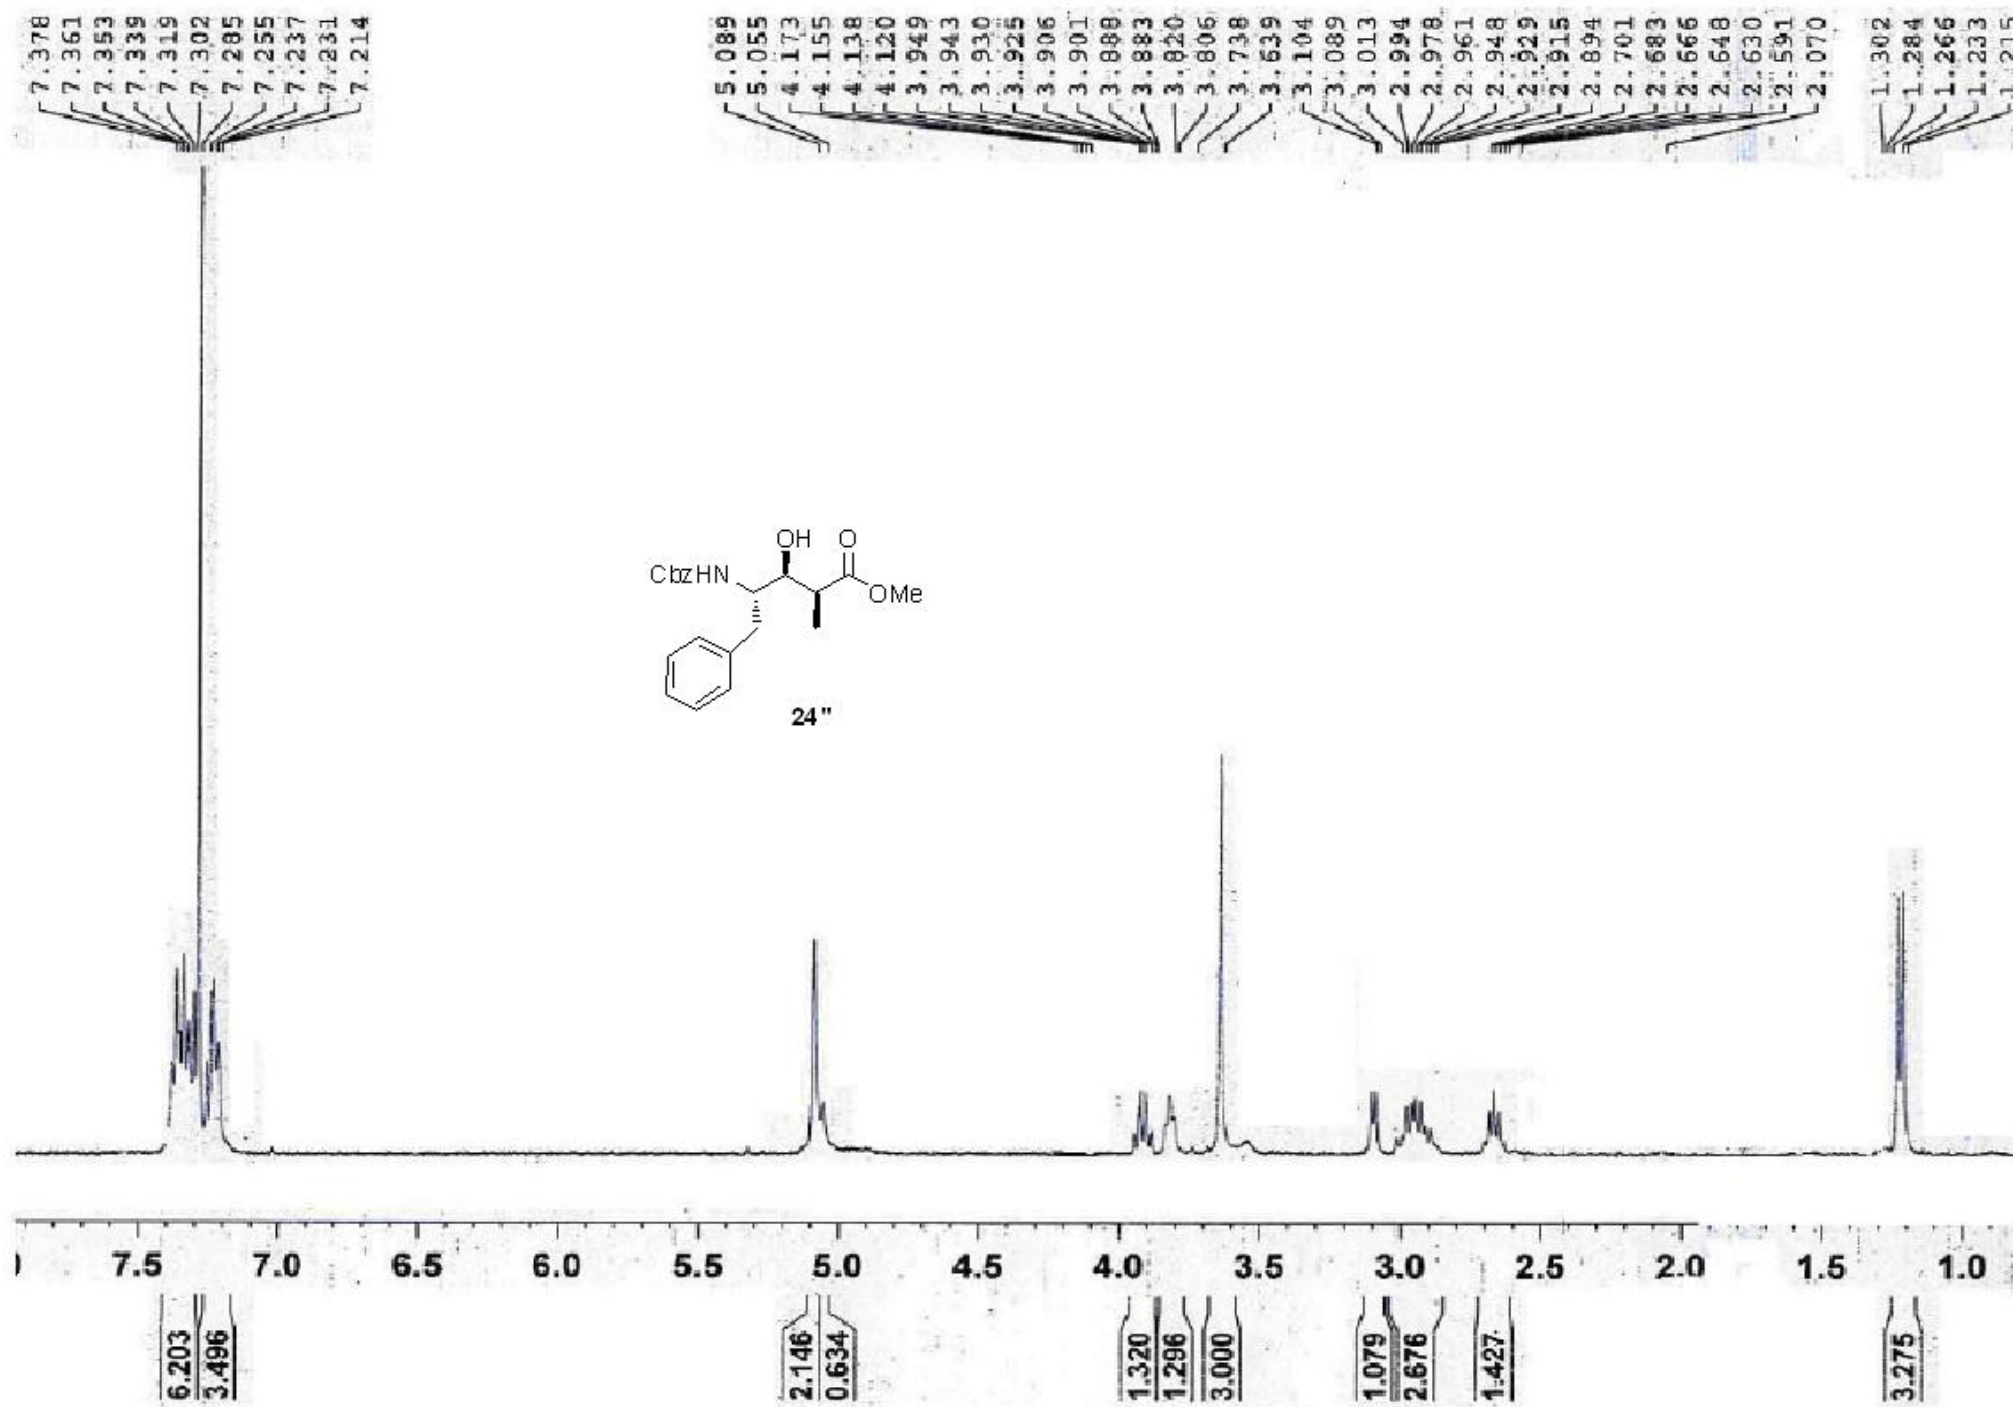



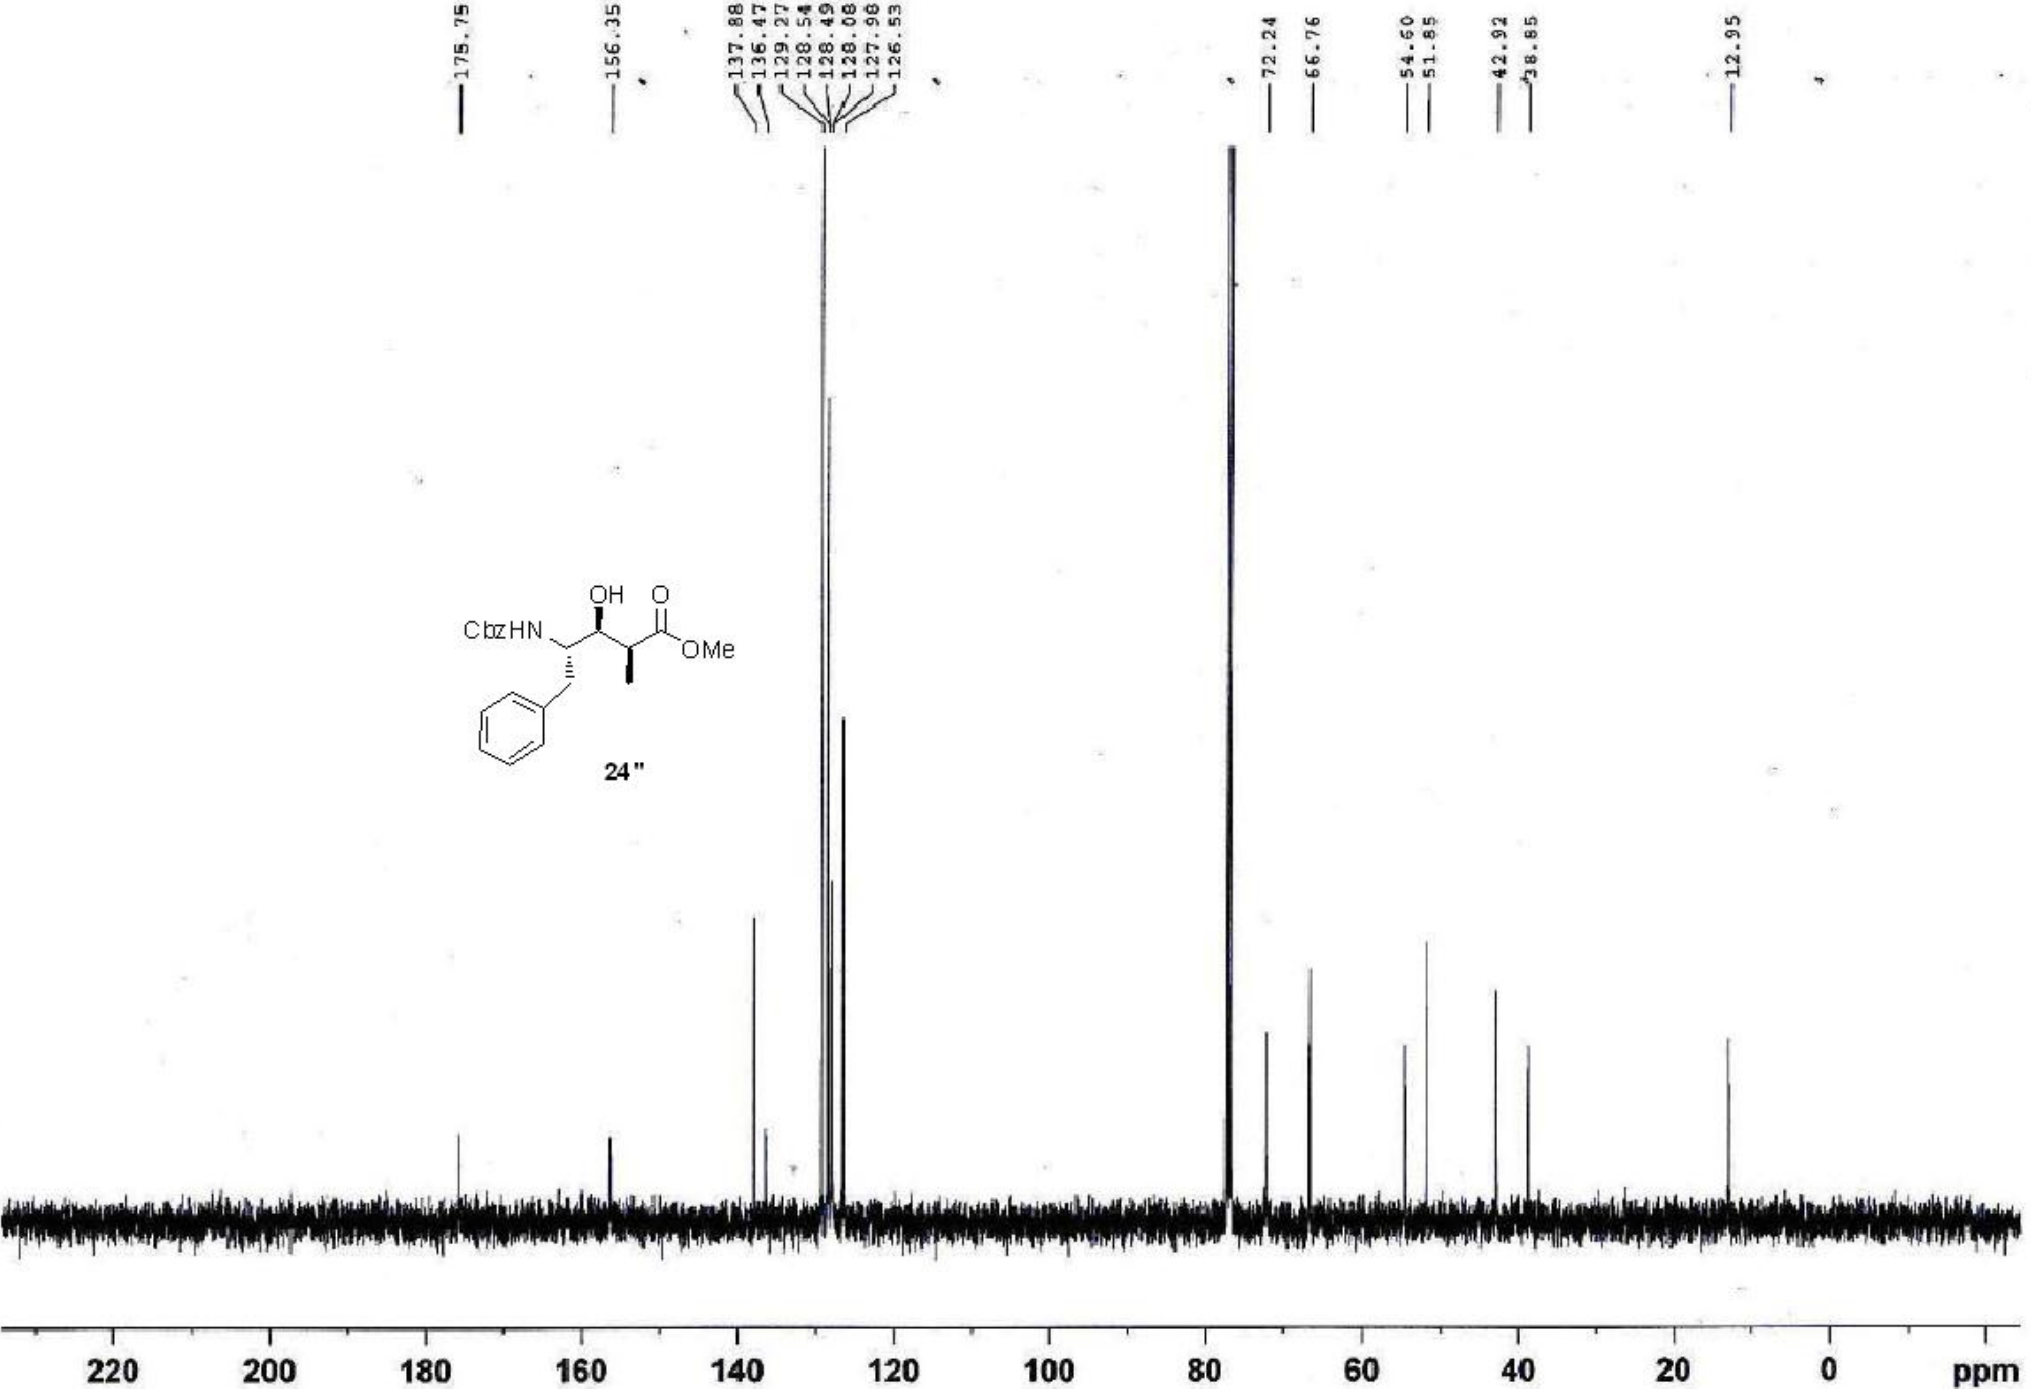

20120924-01

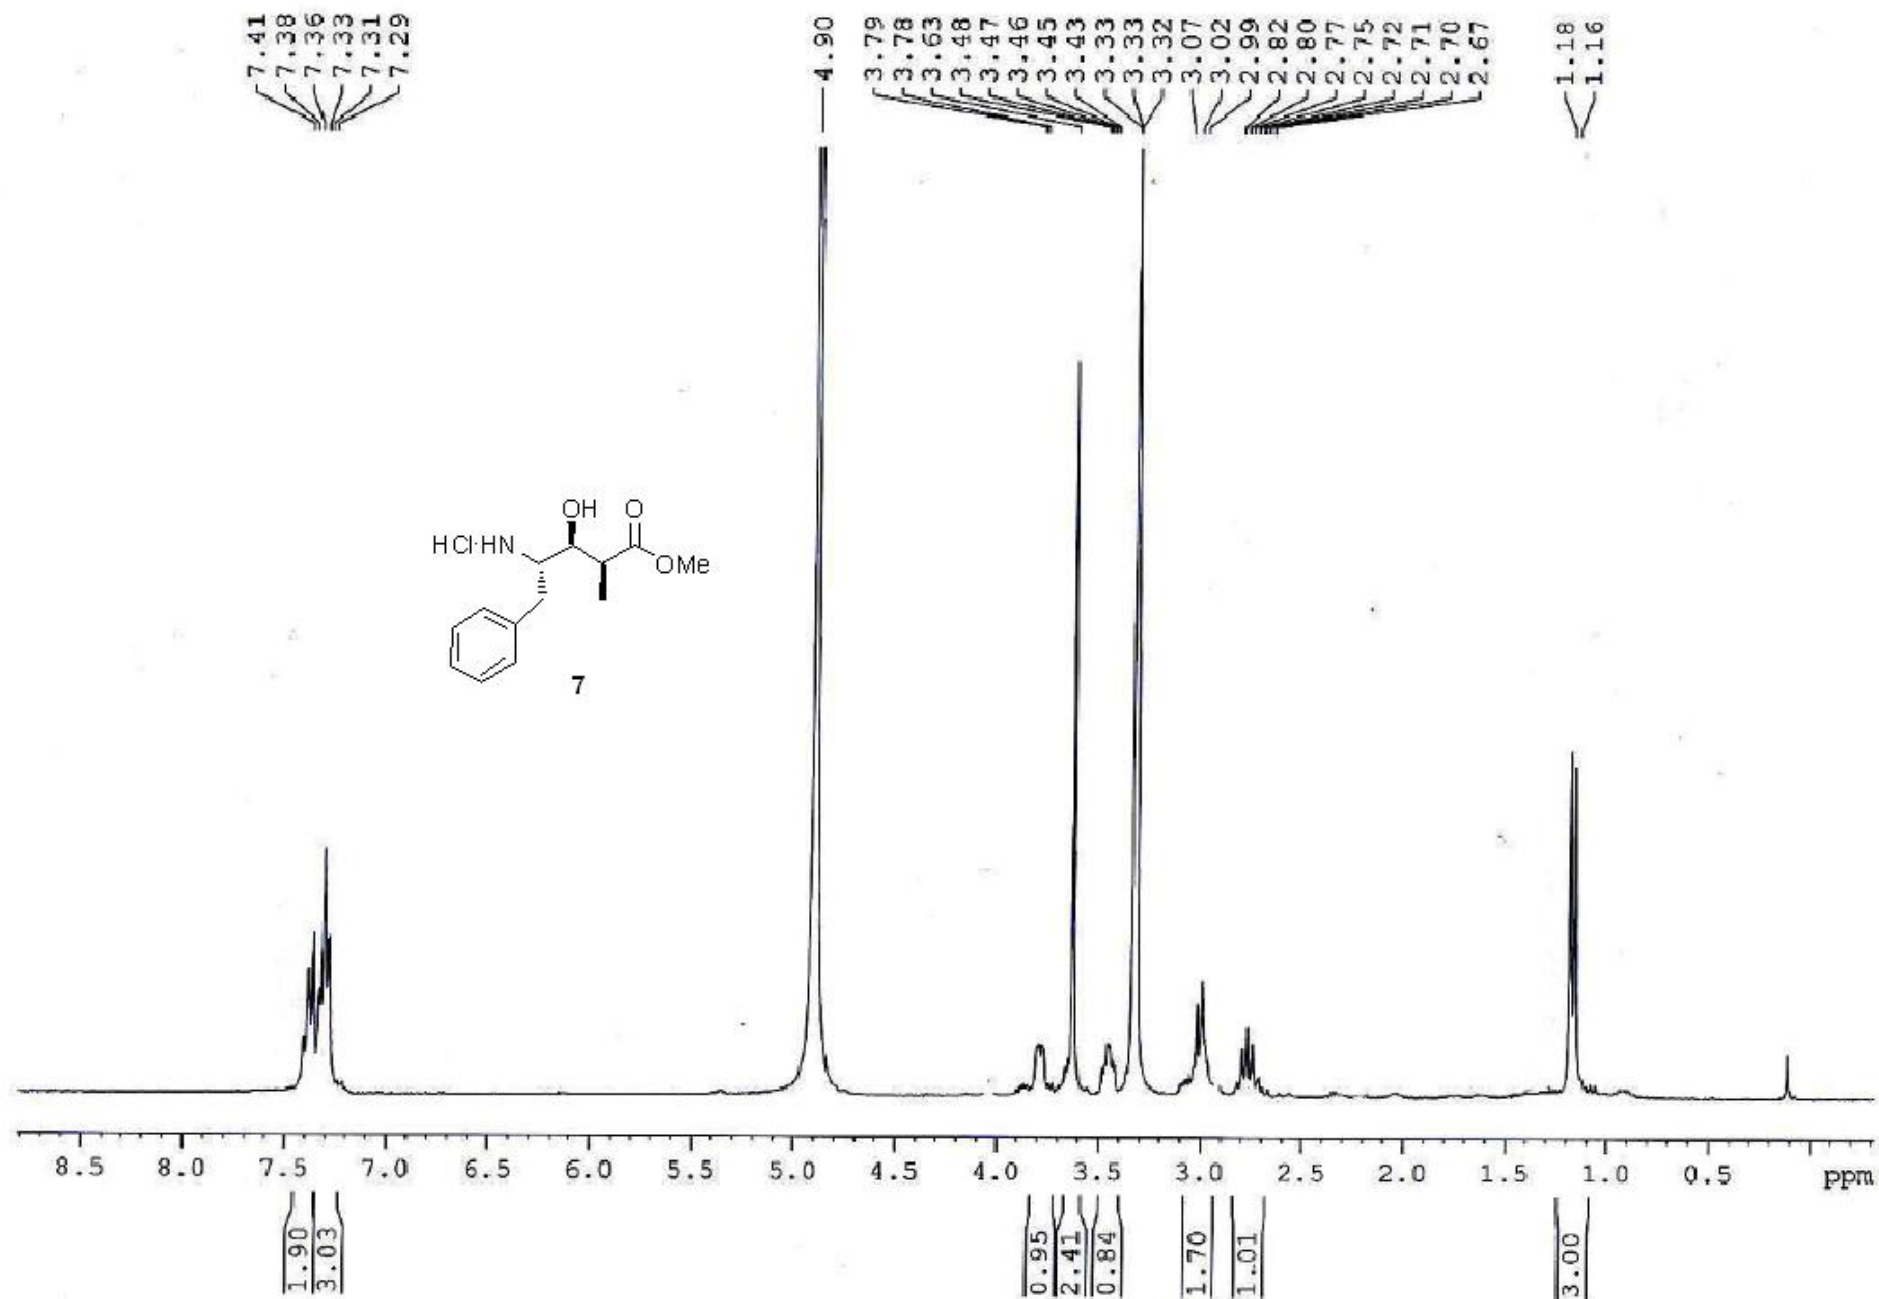

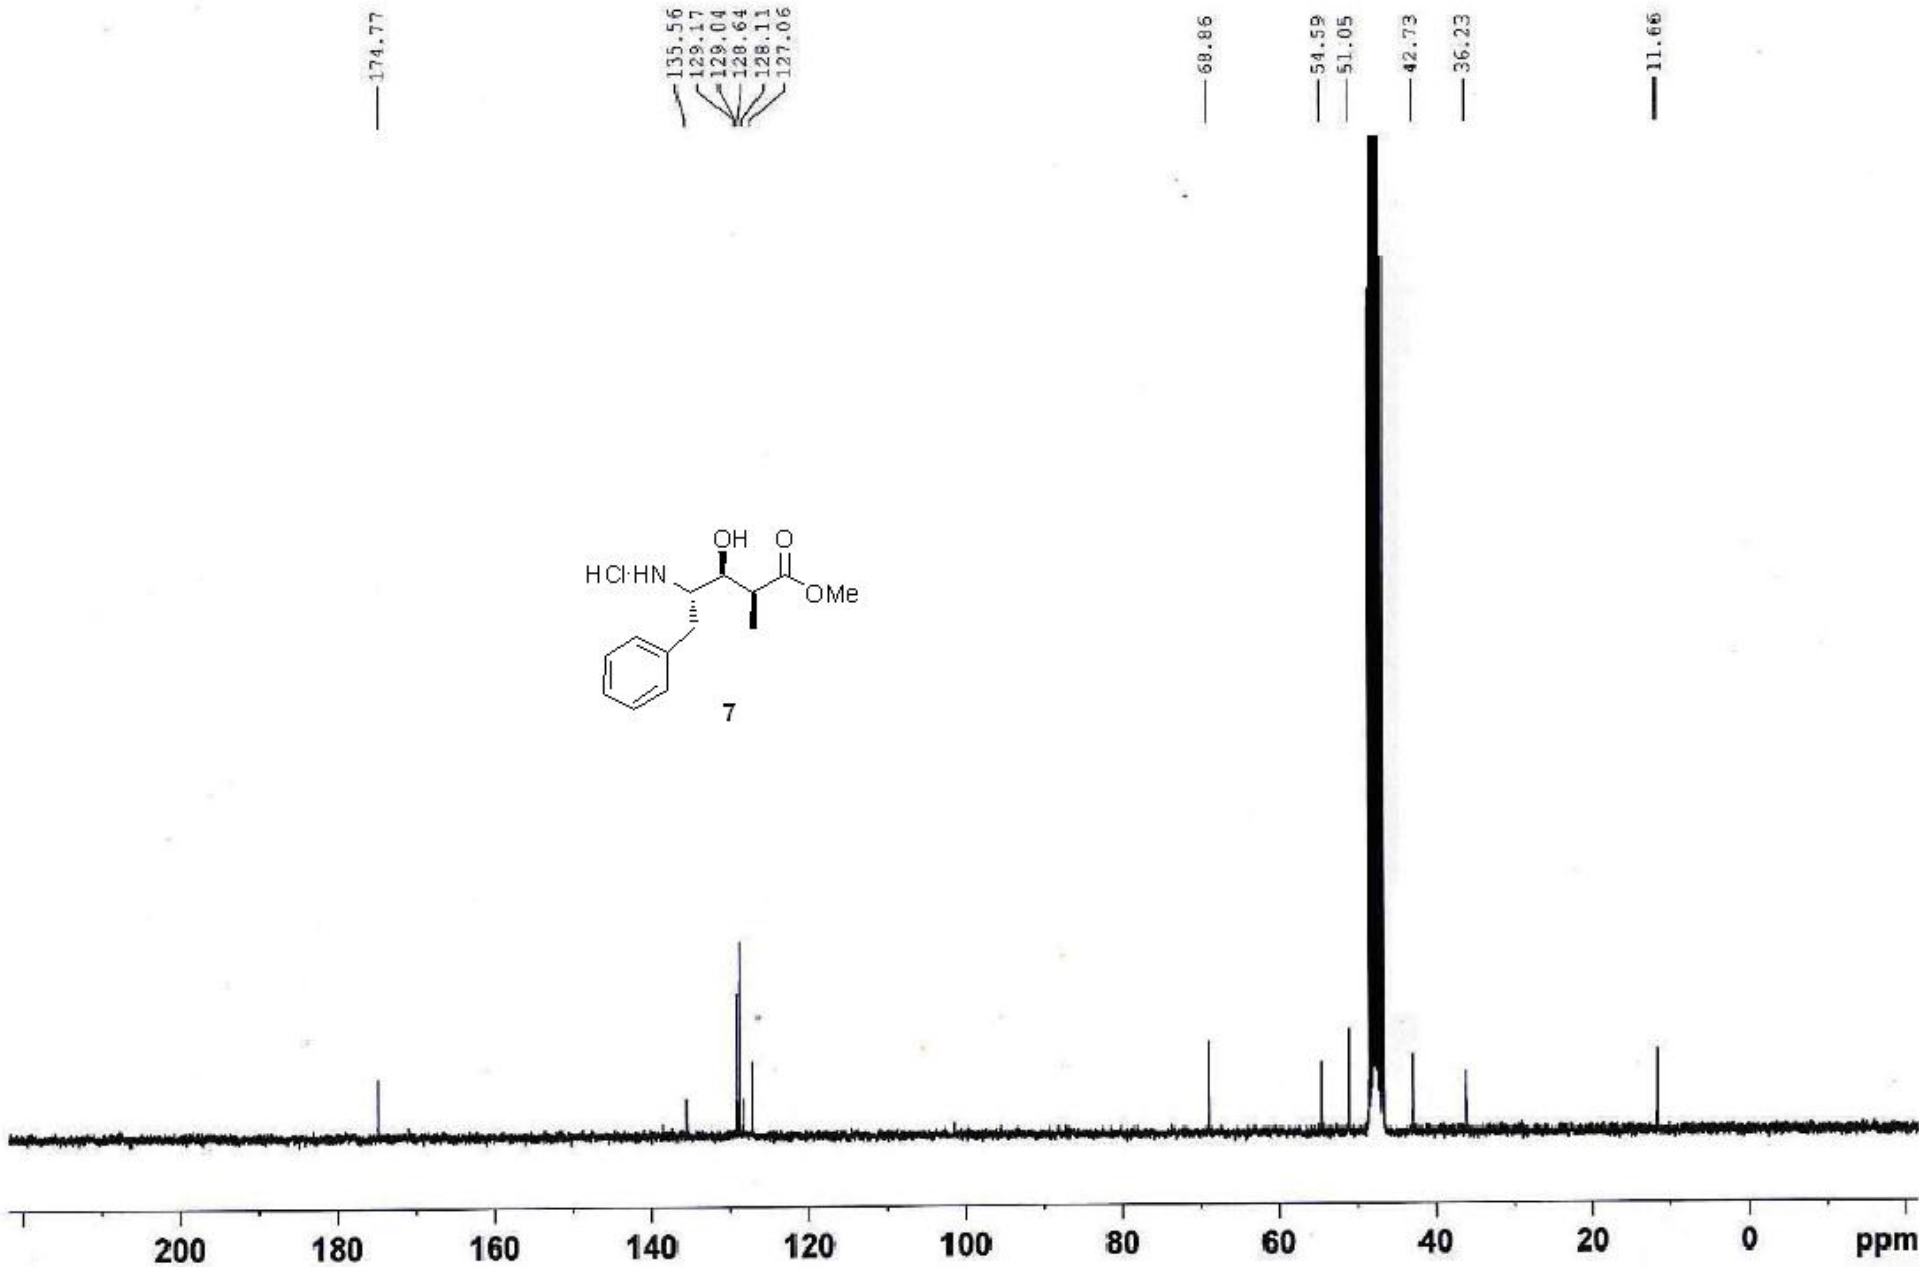

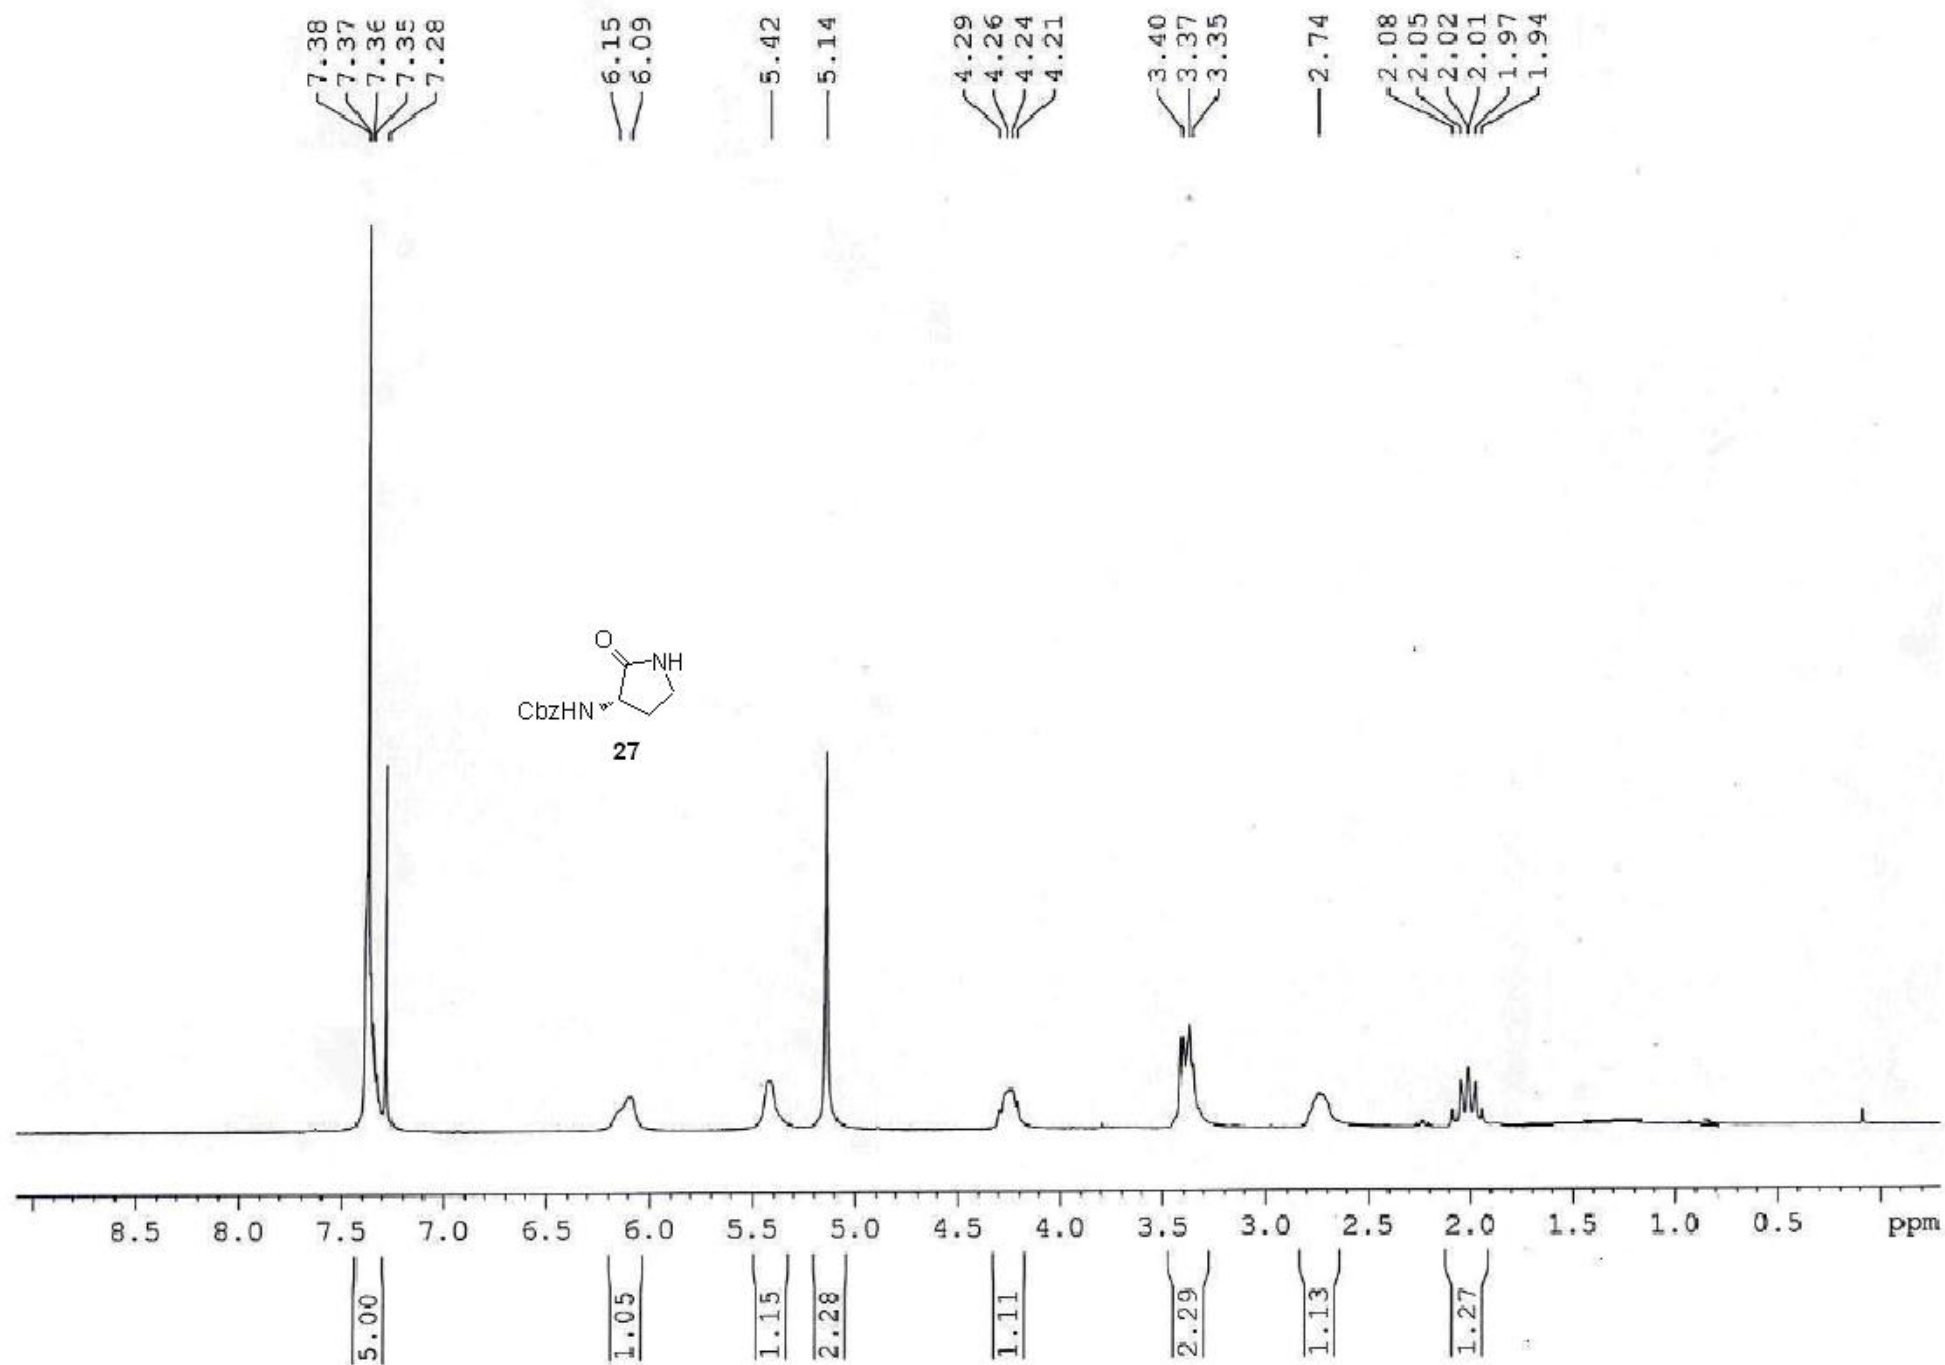

longbohua 20121010-02

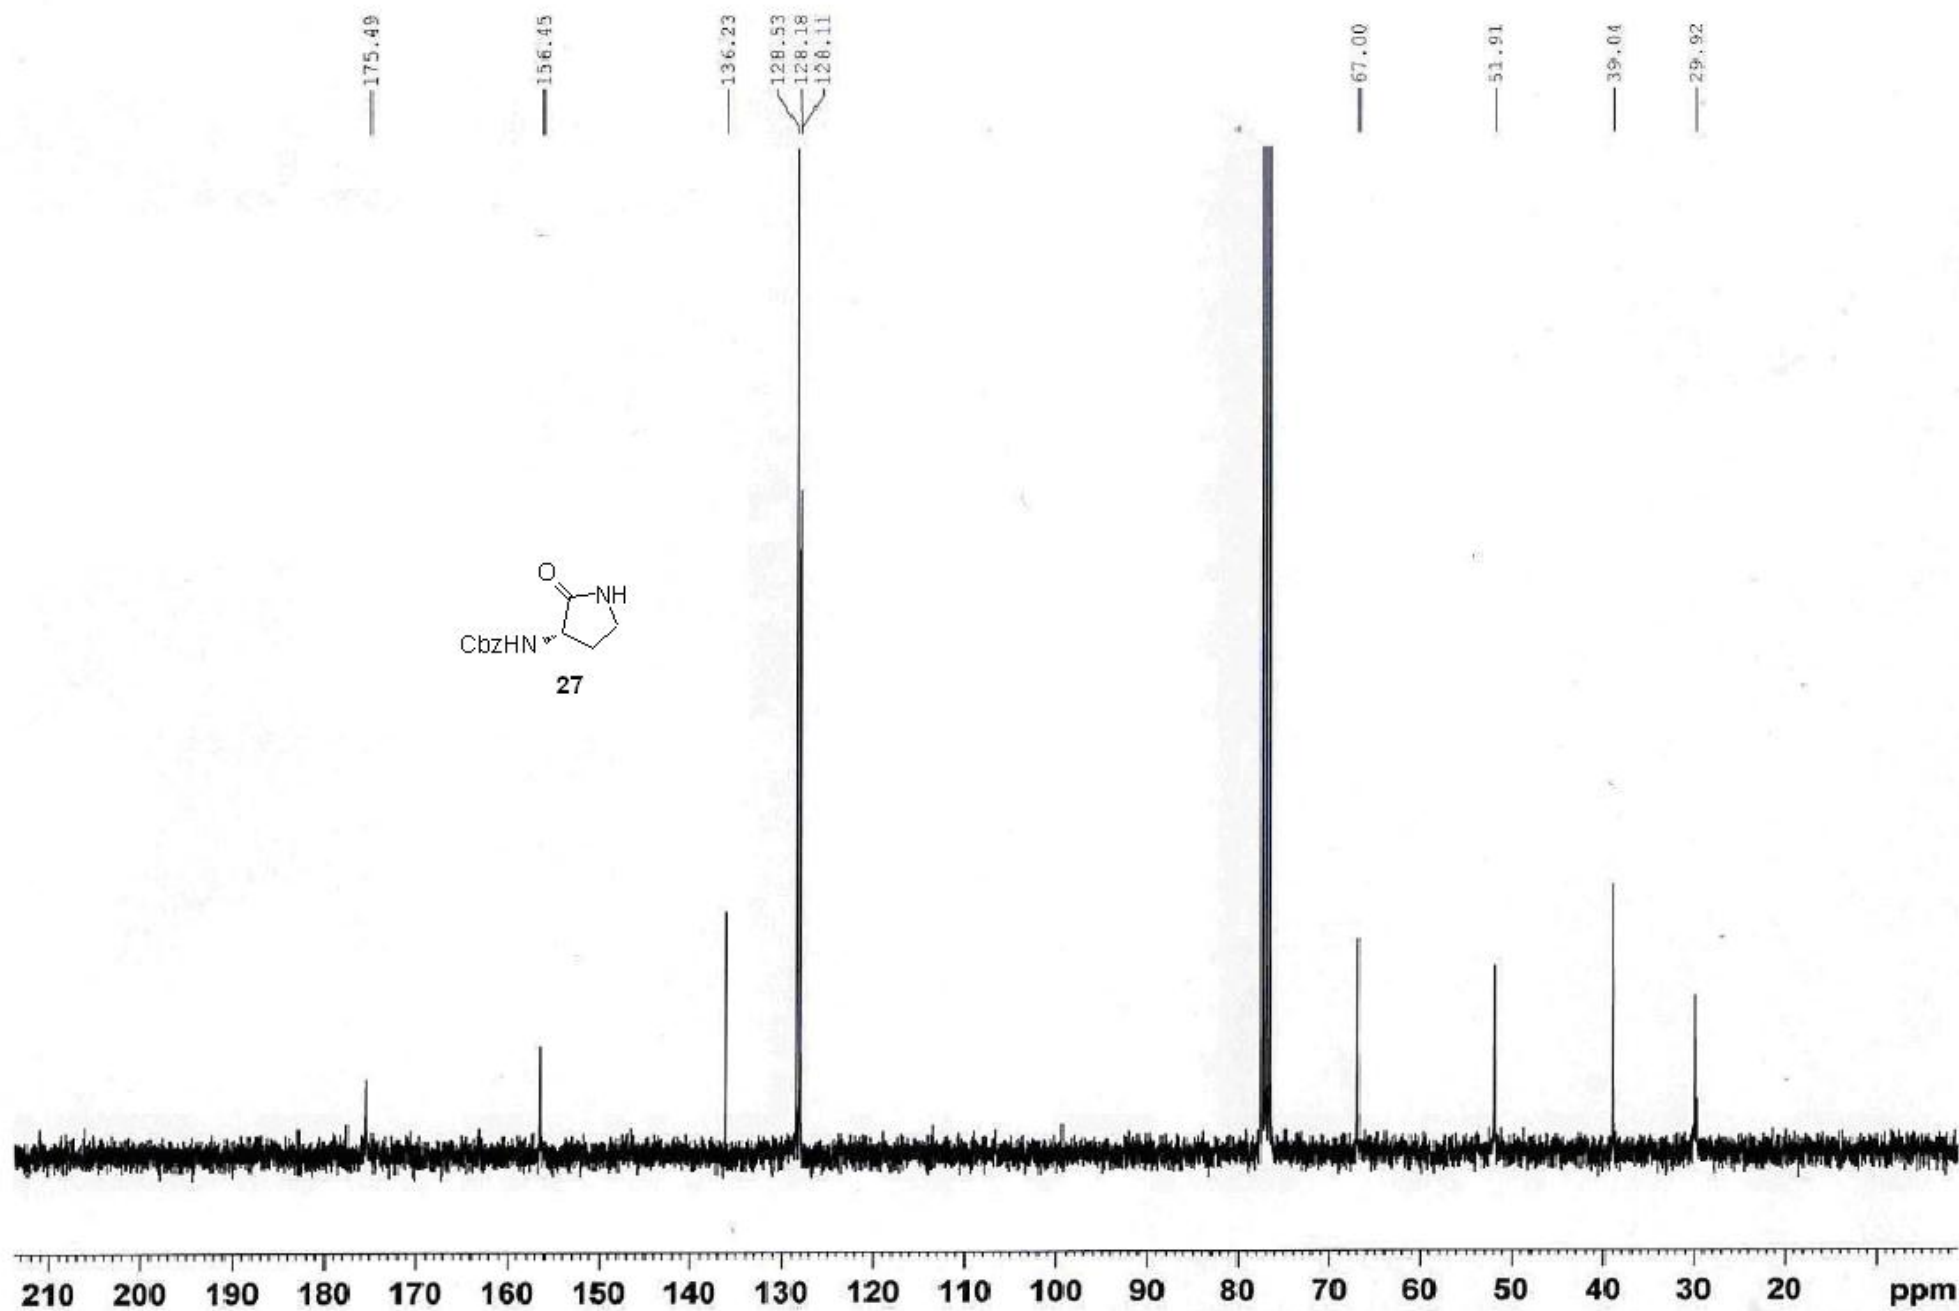

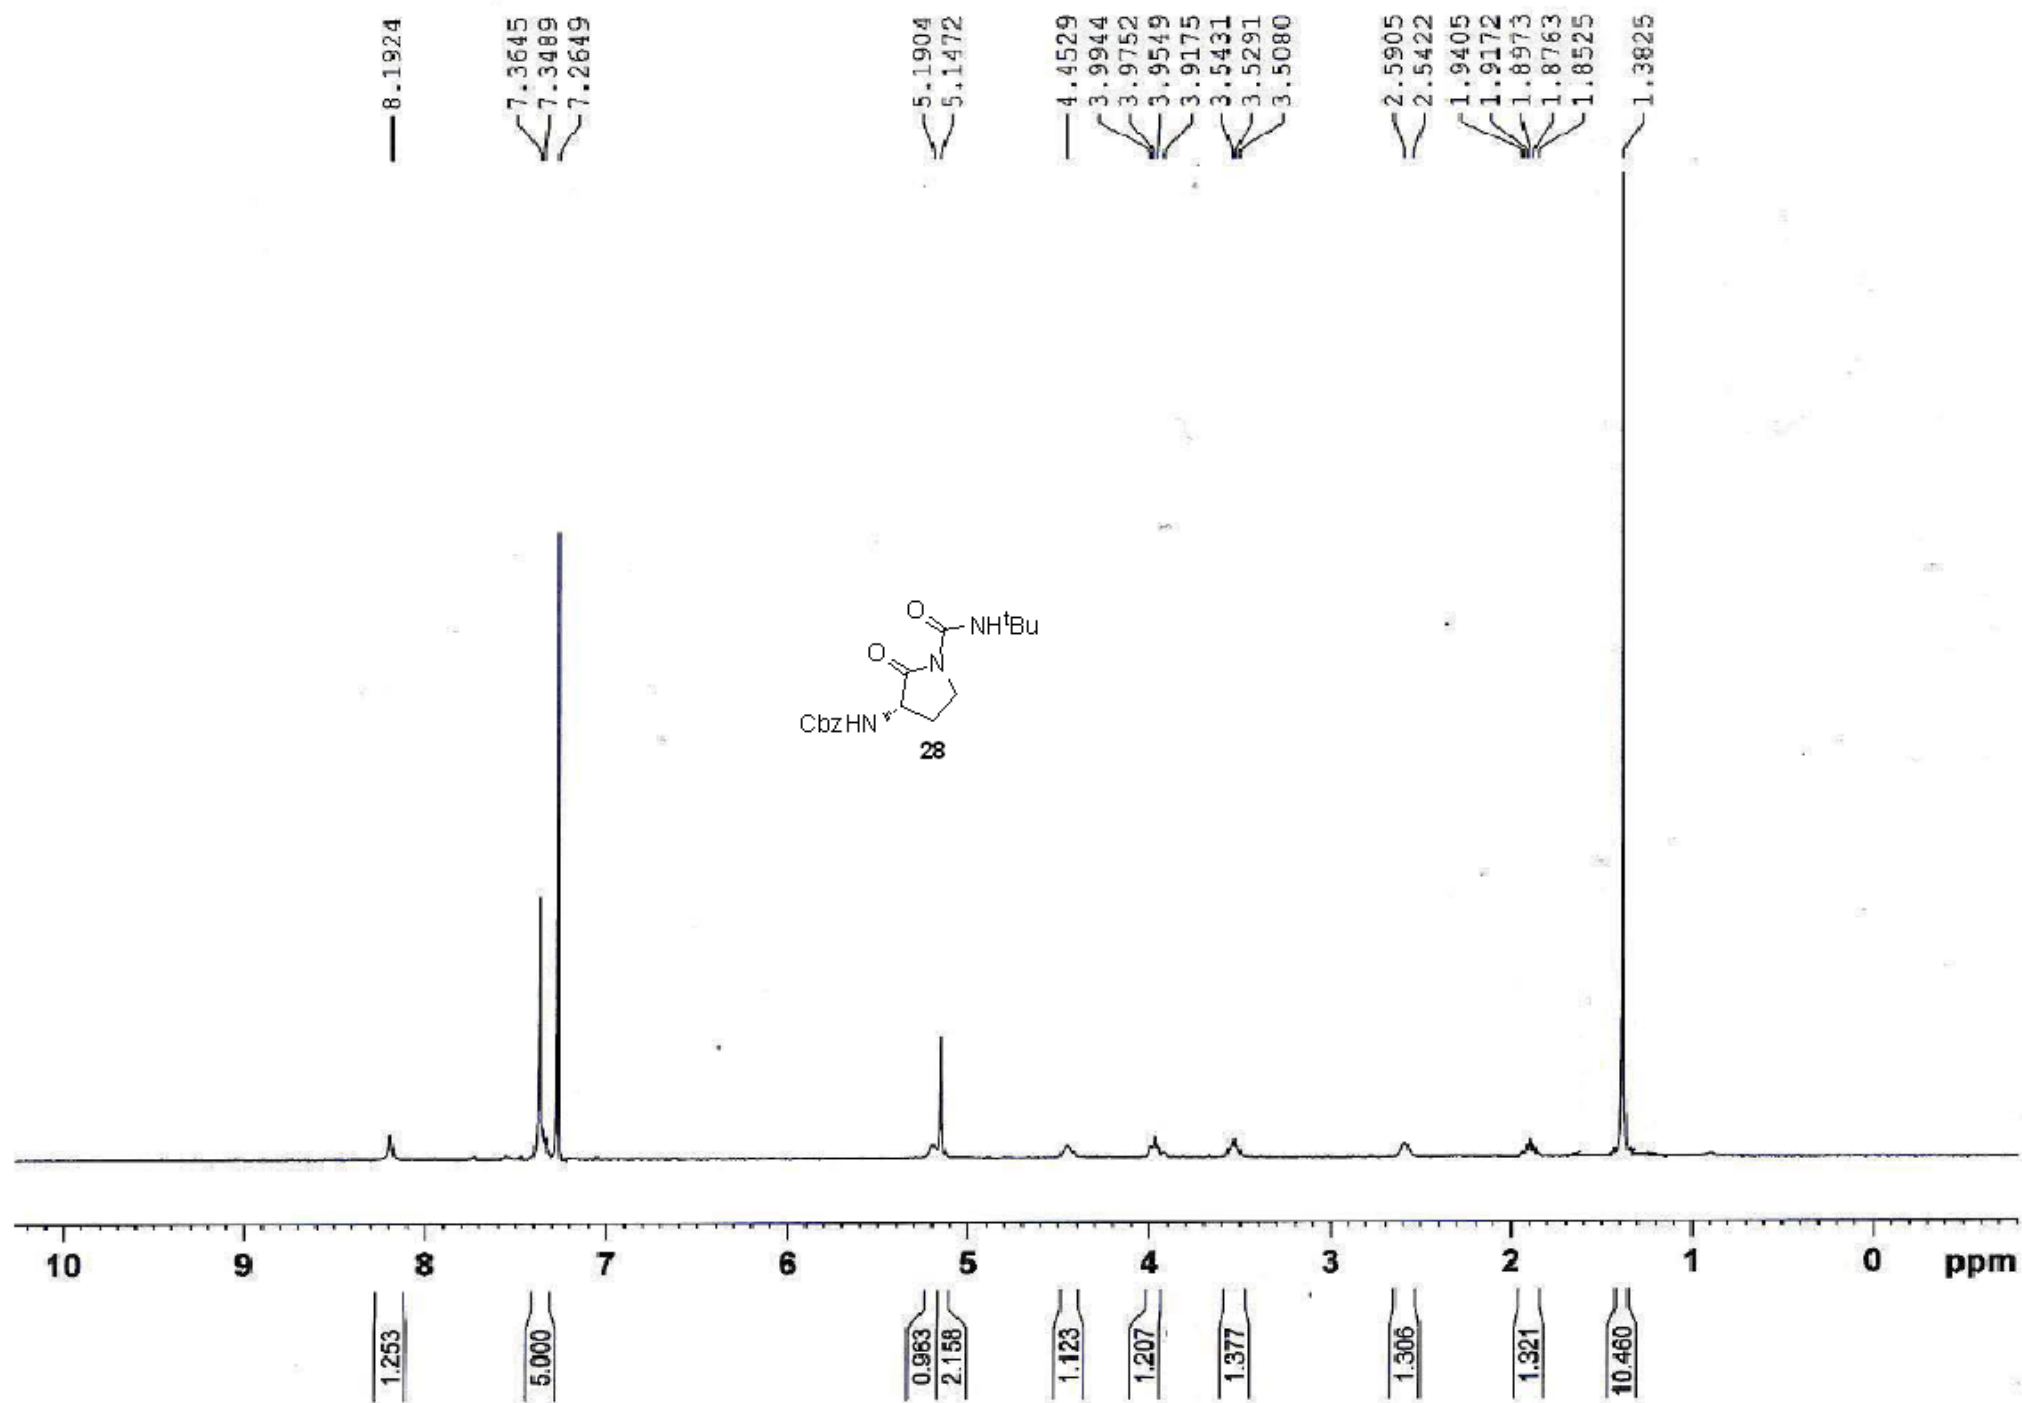

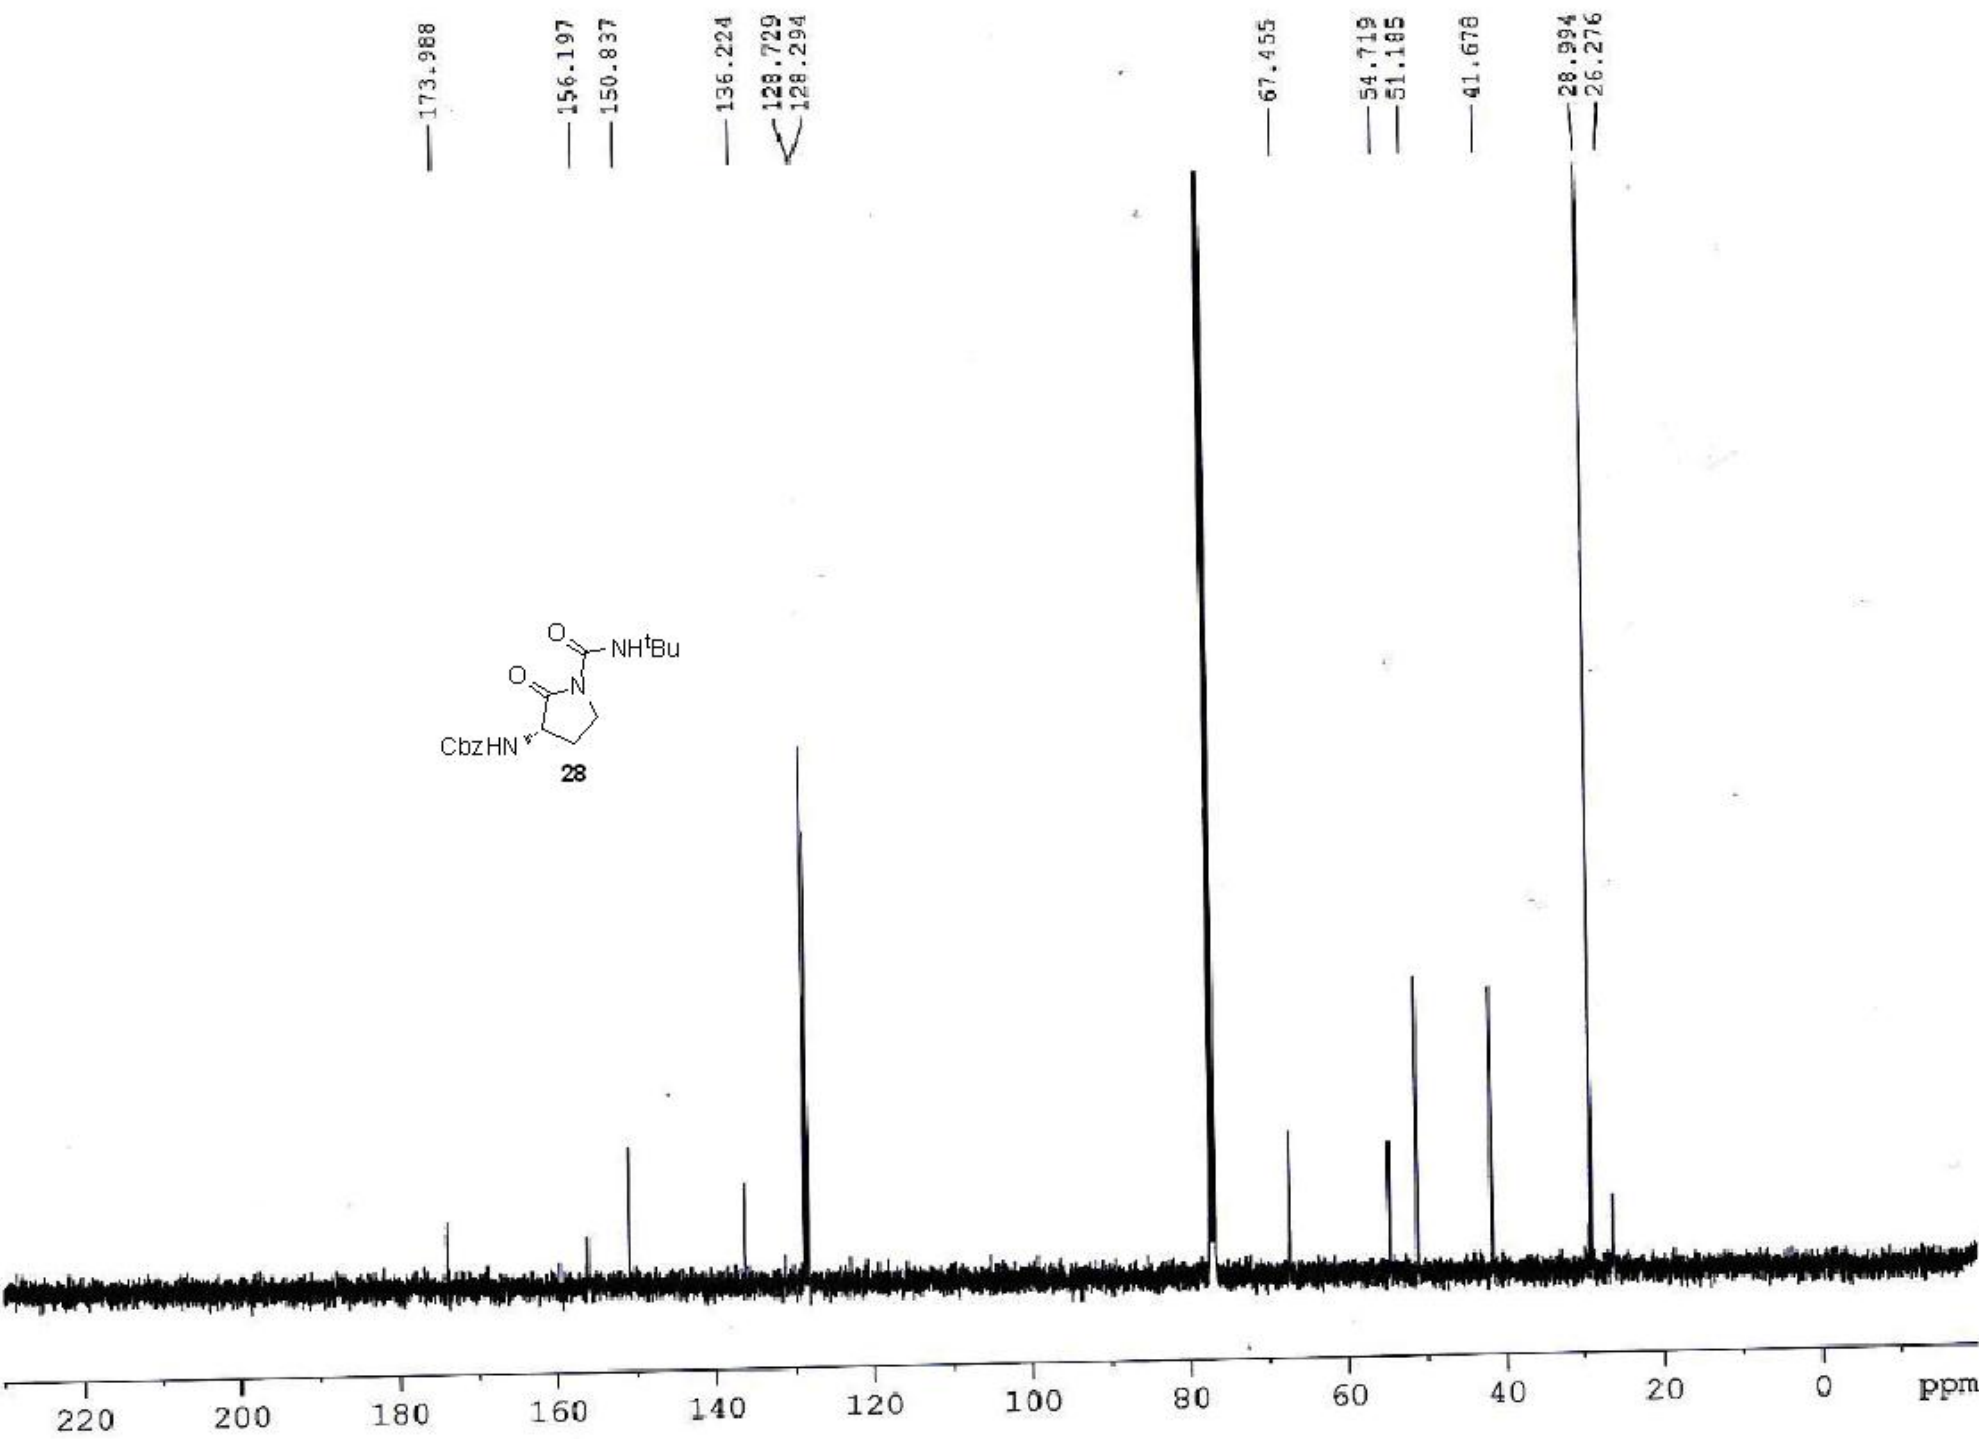

20120503-01

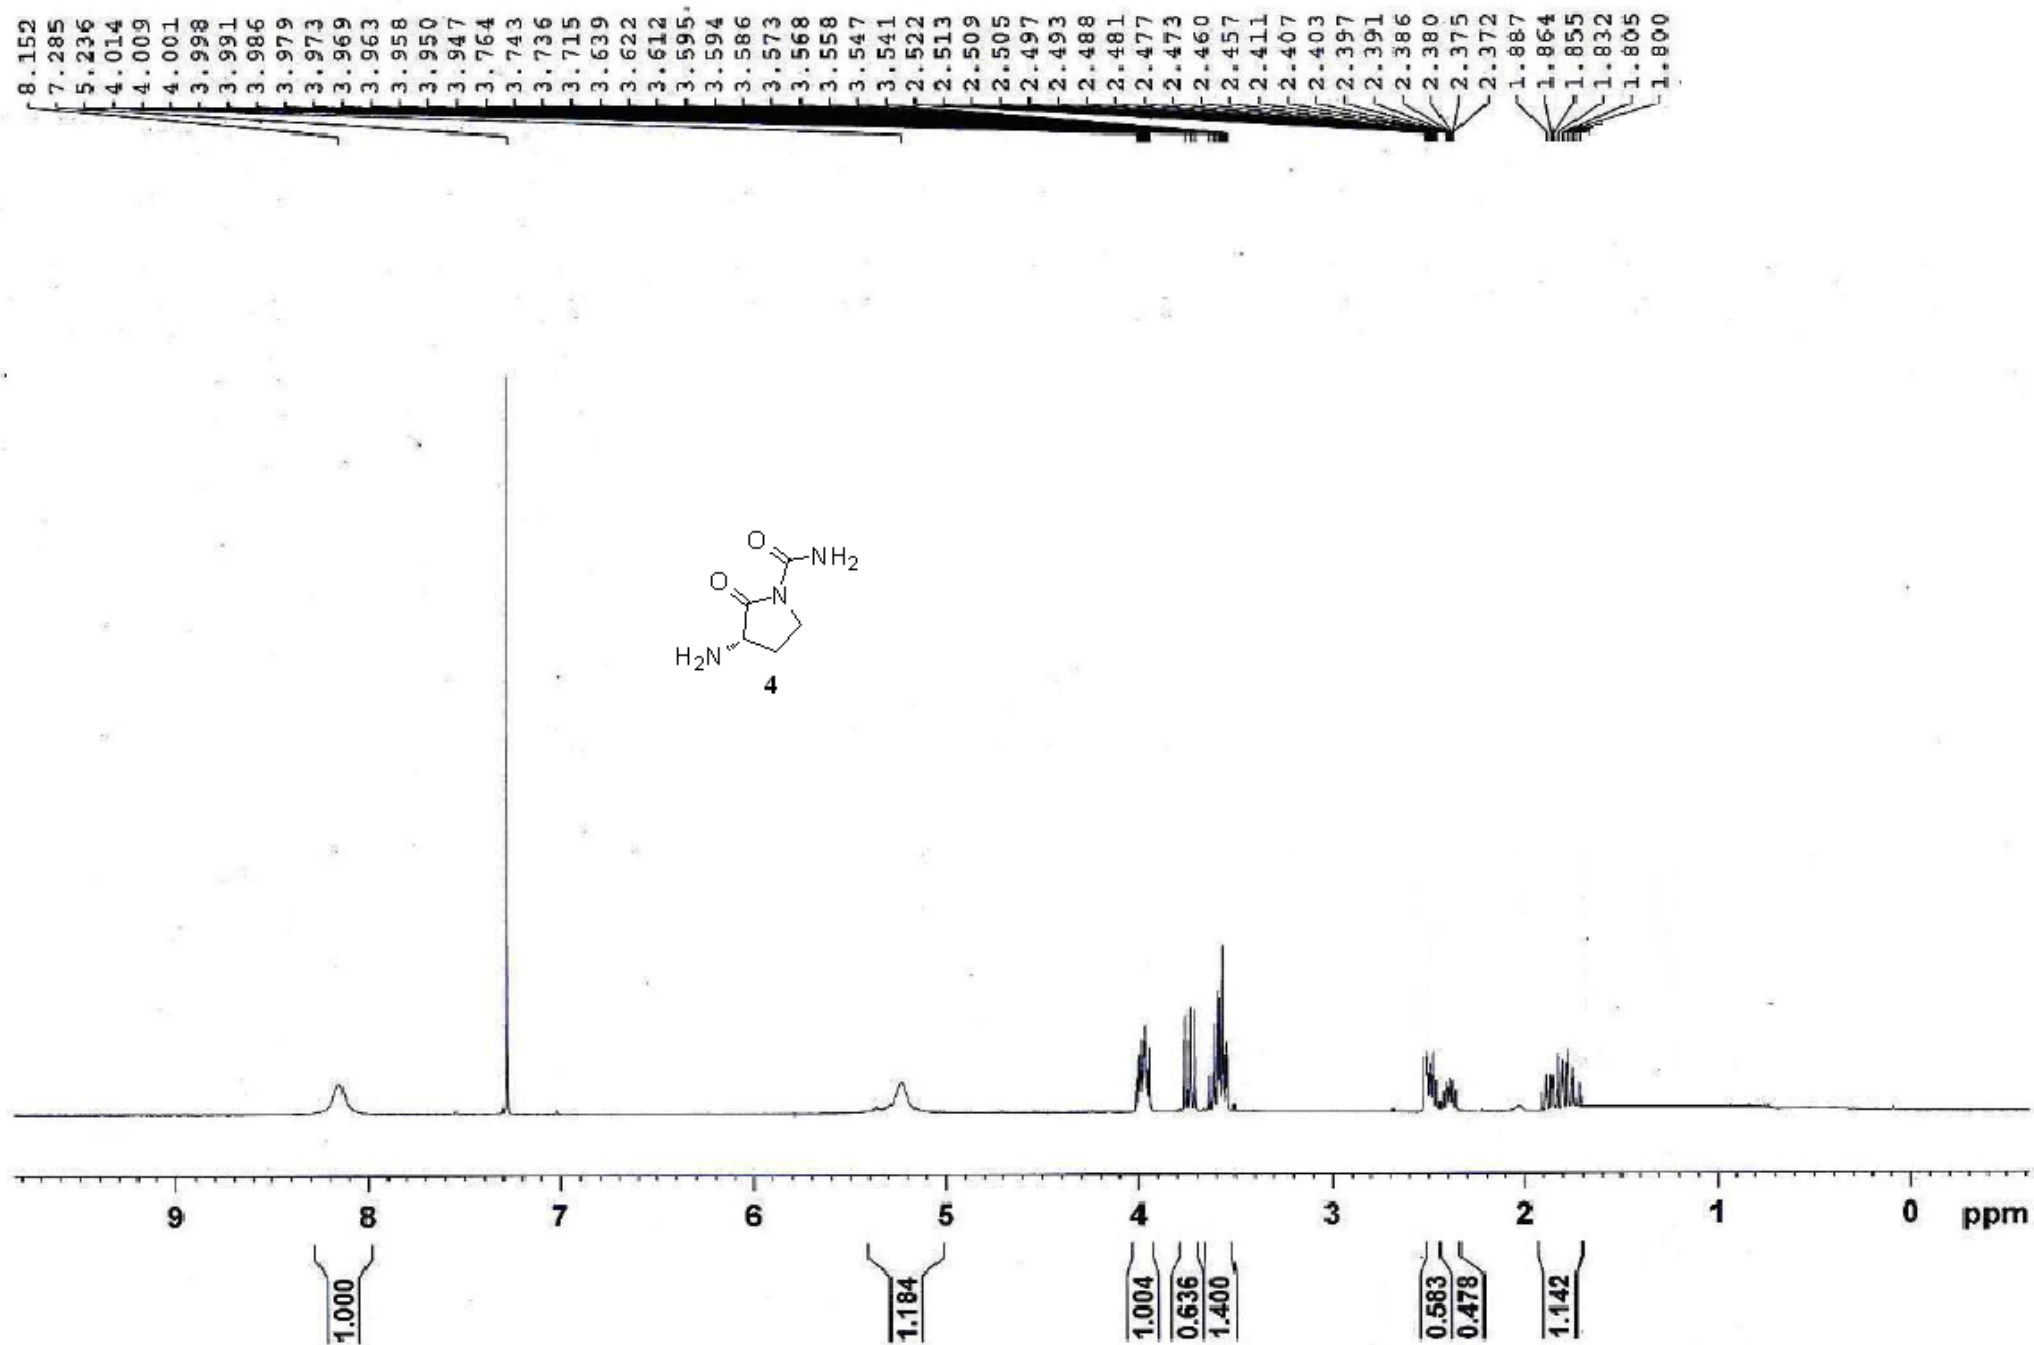



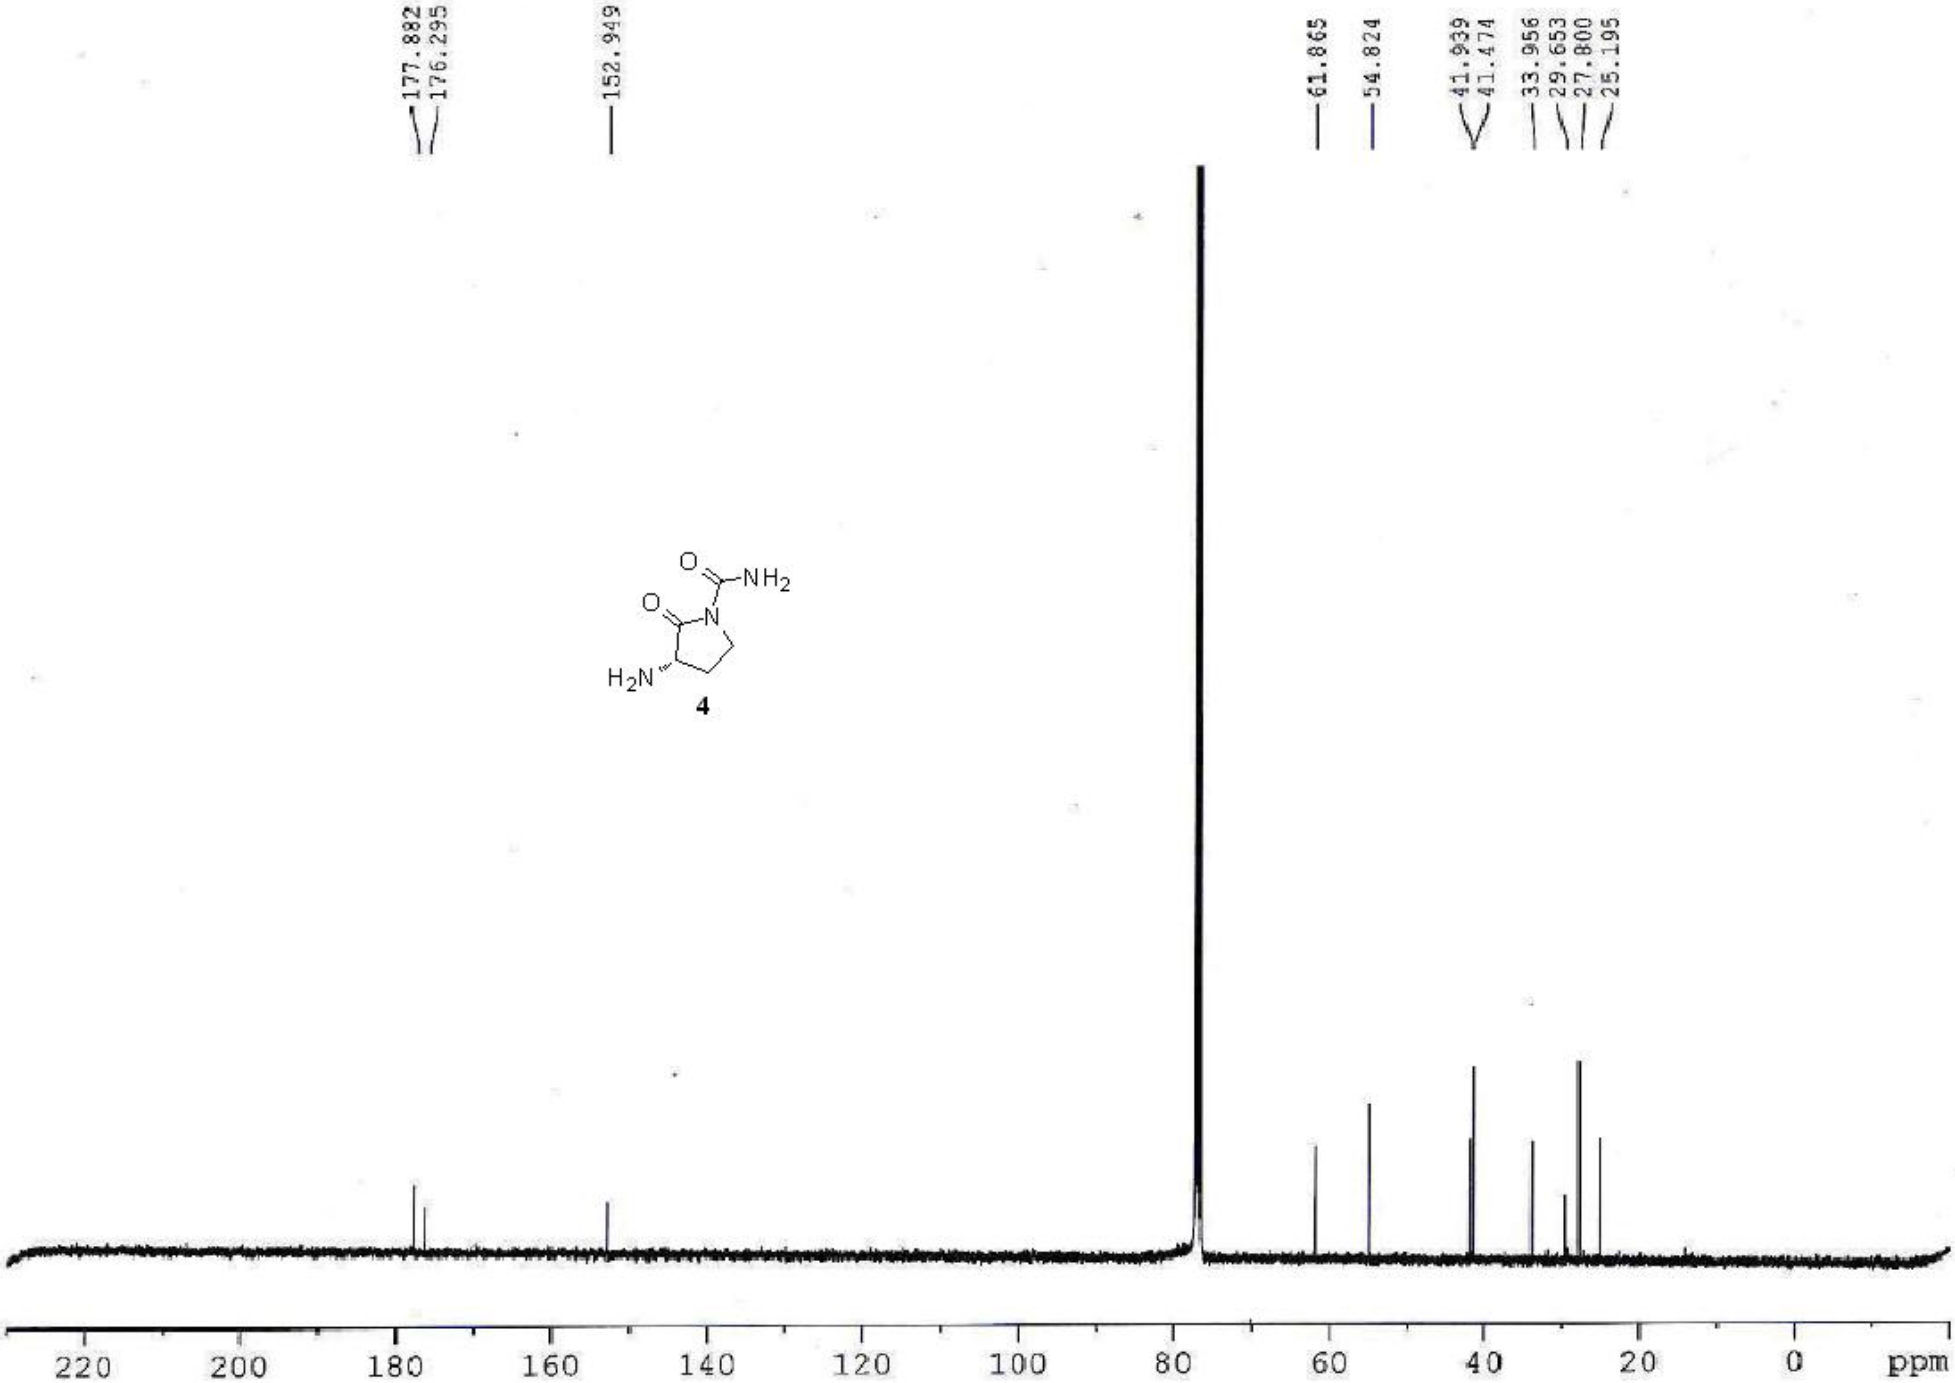

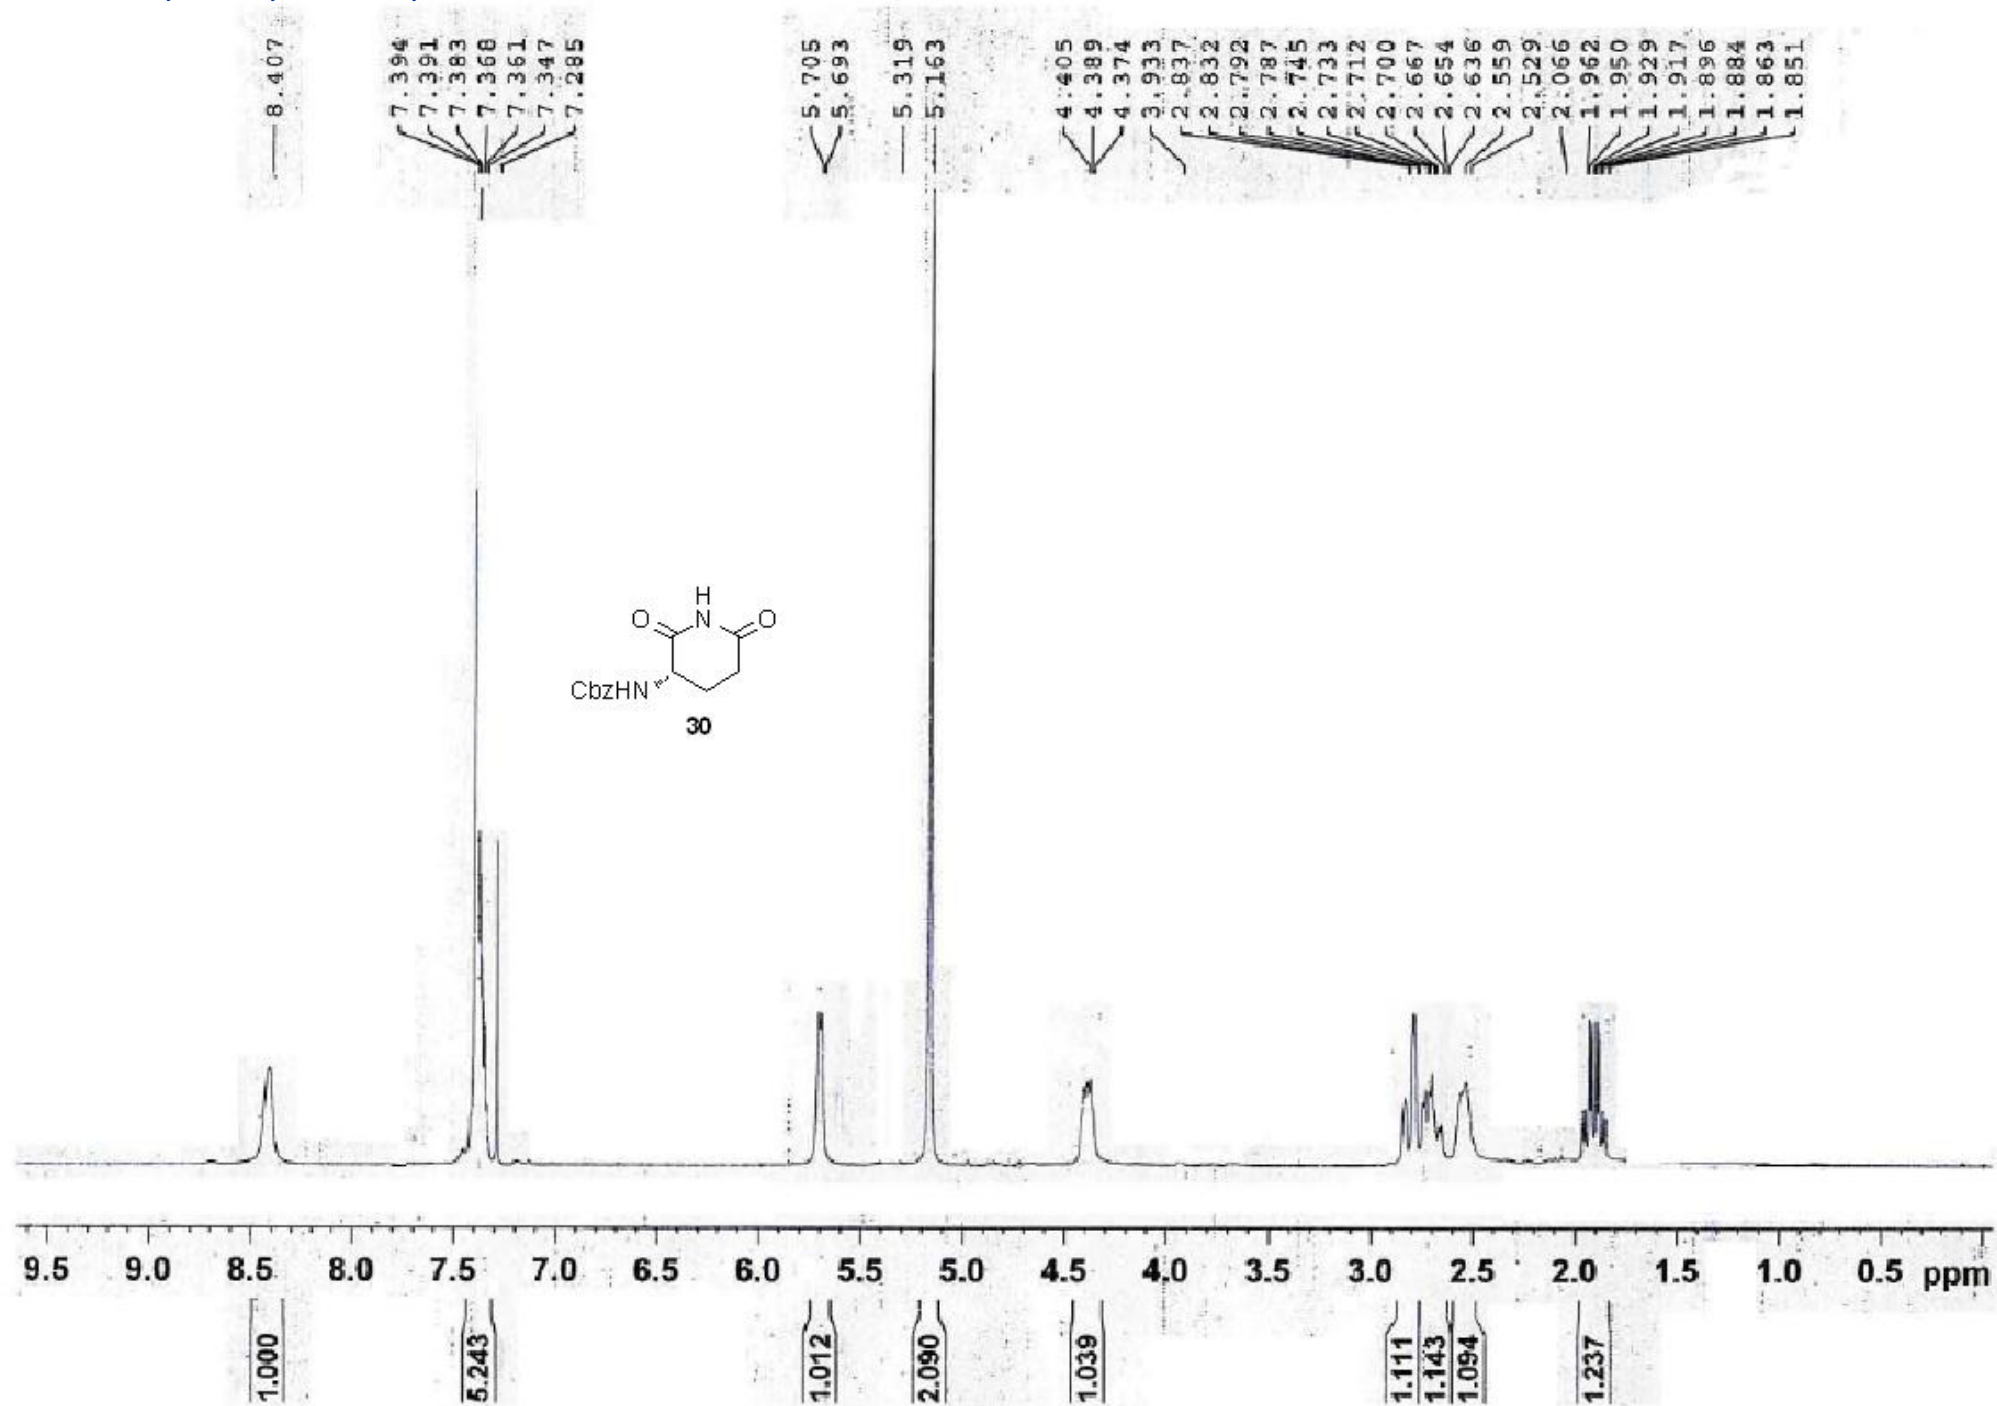

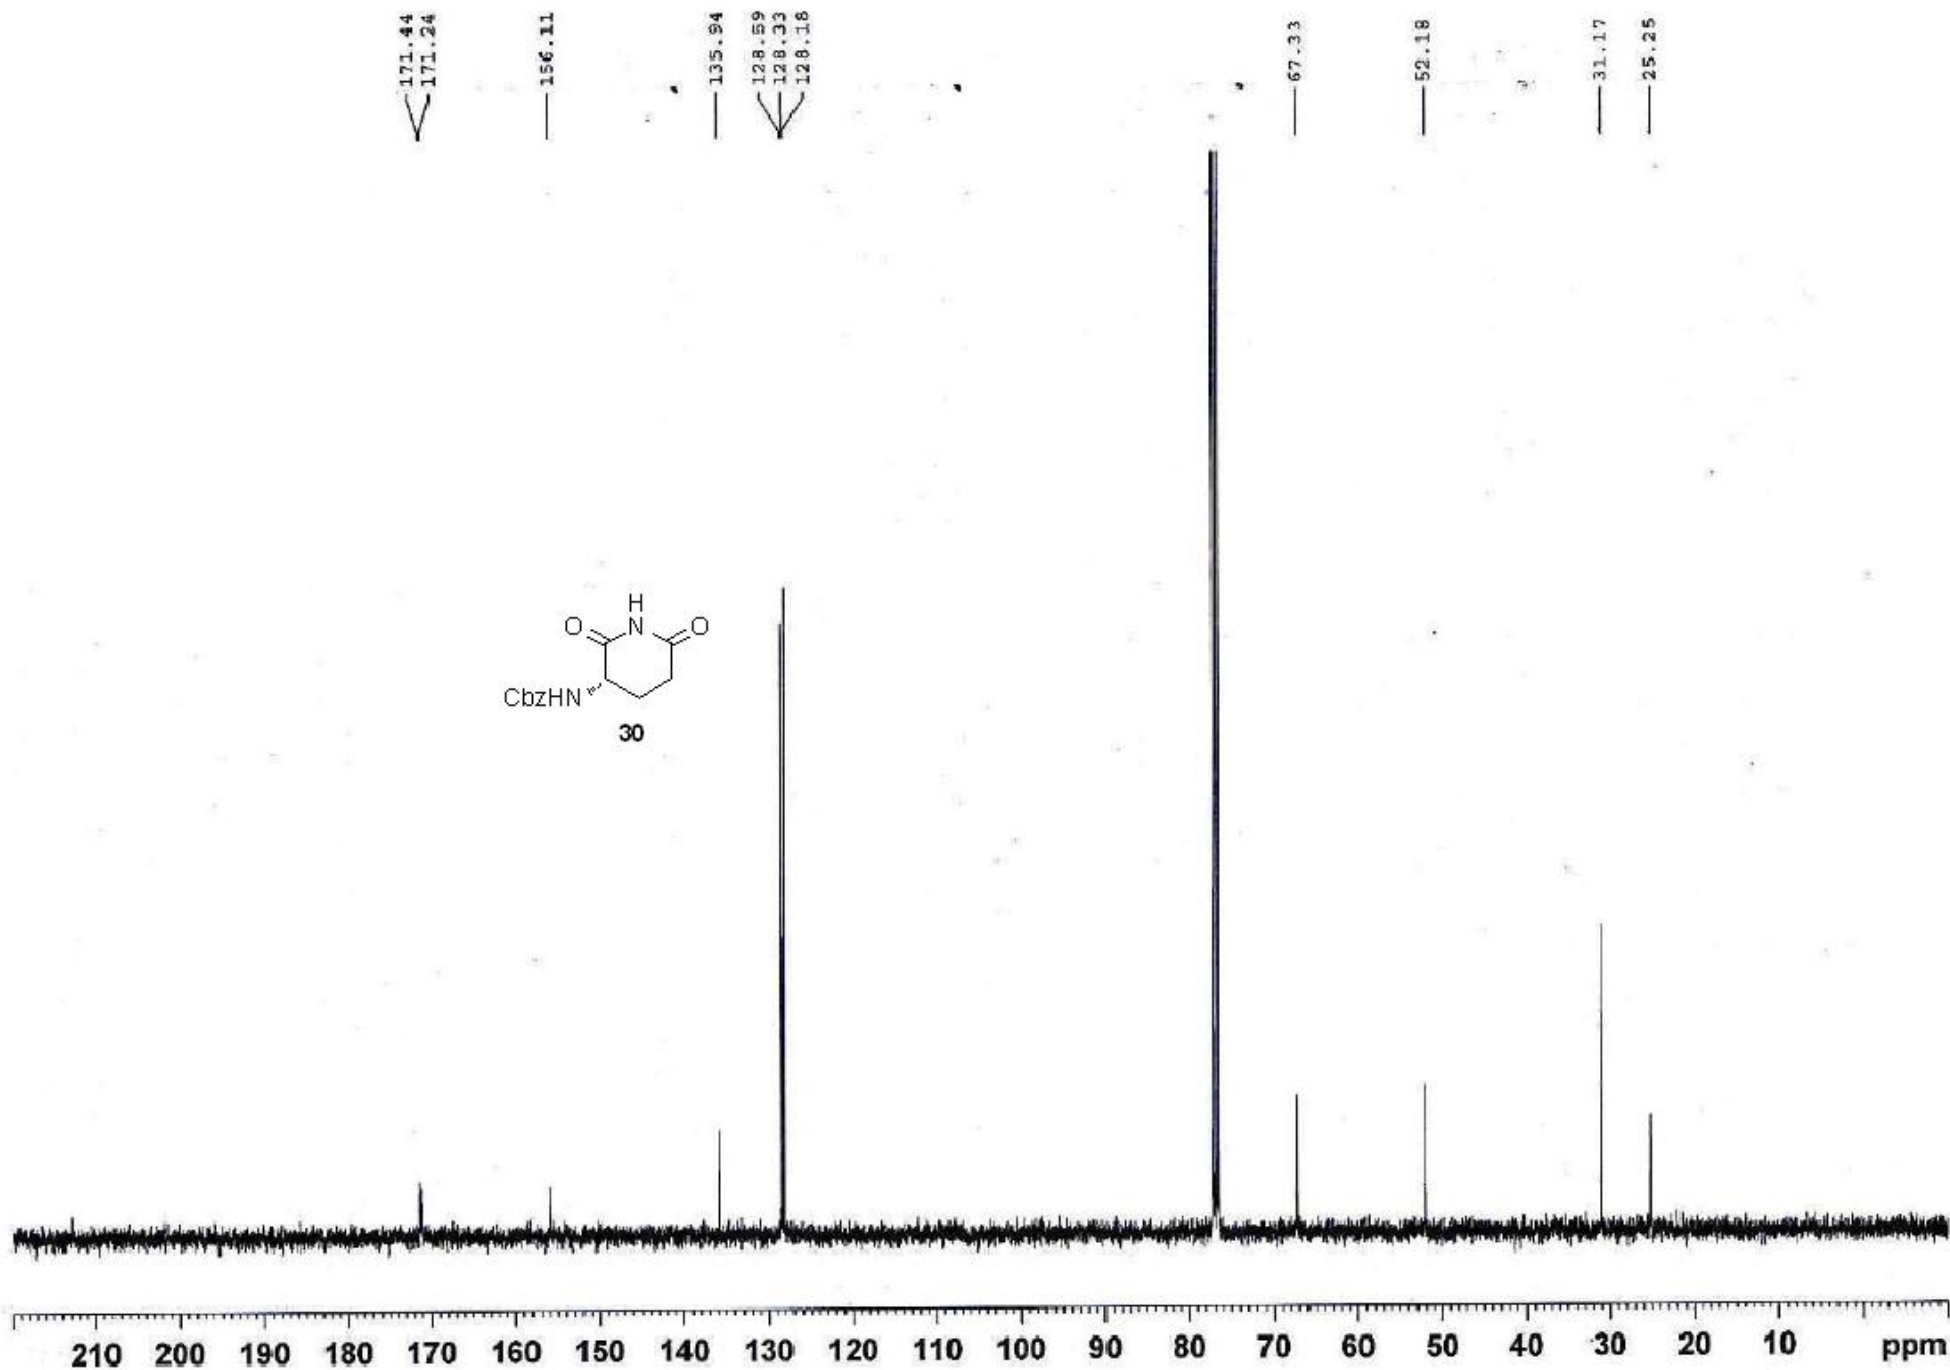

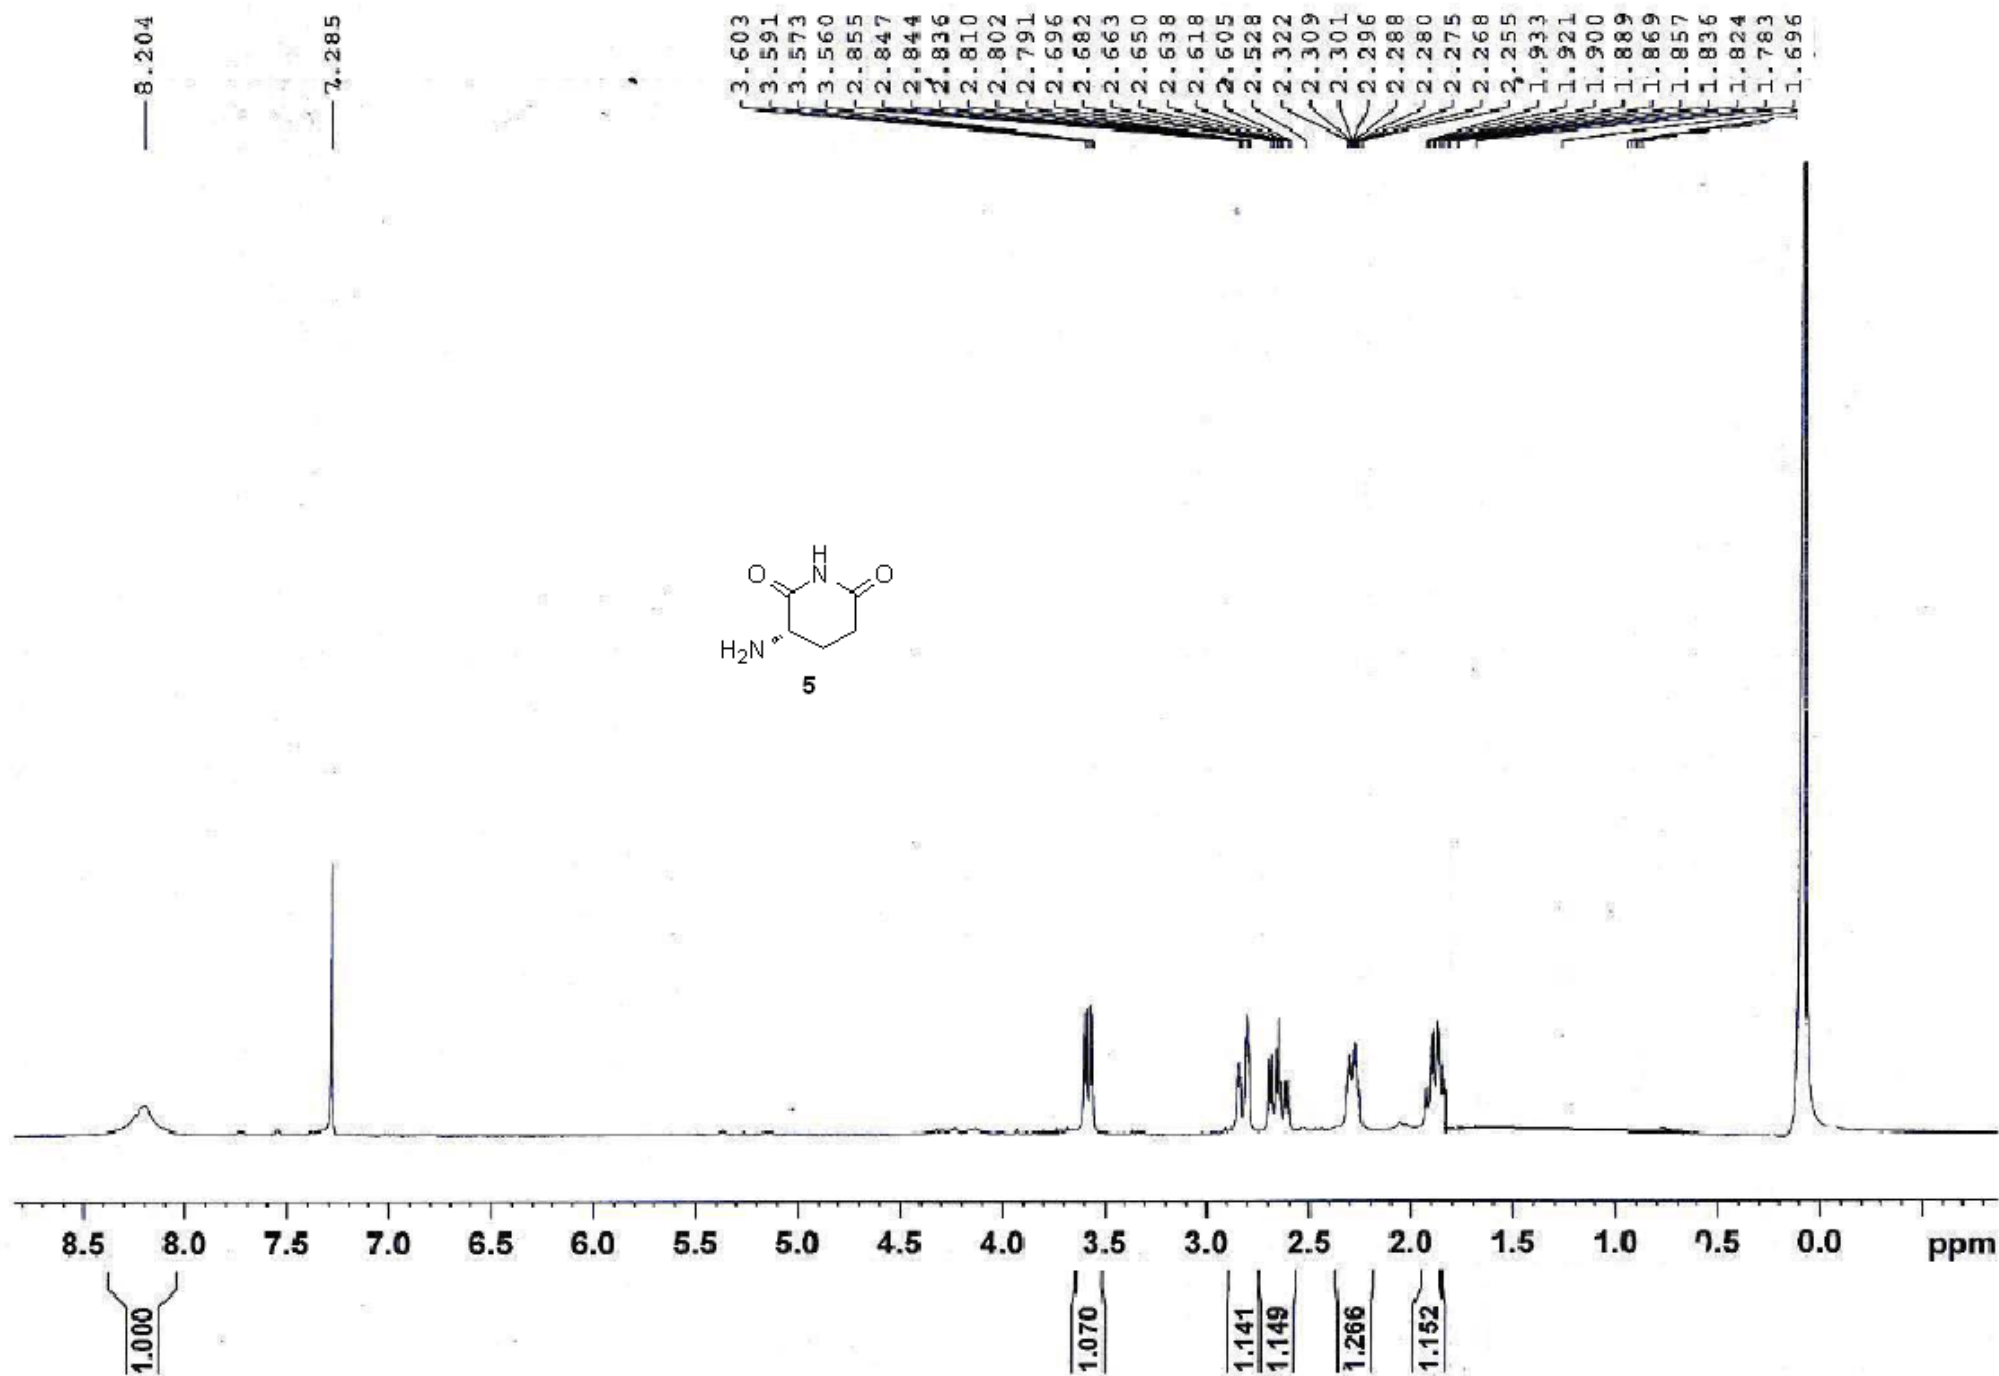

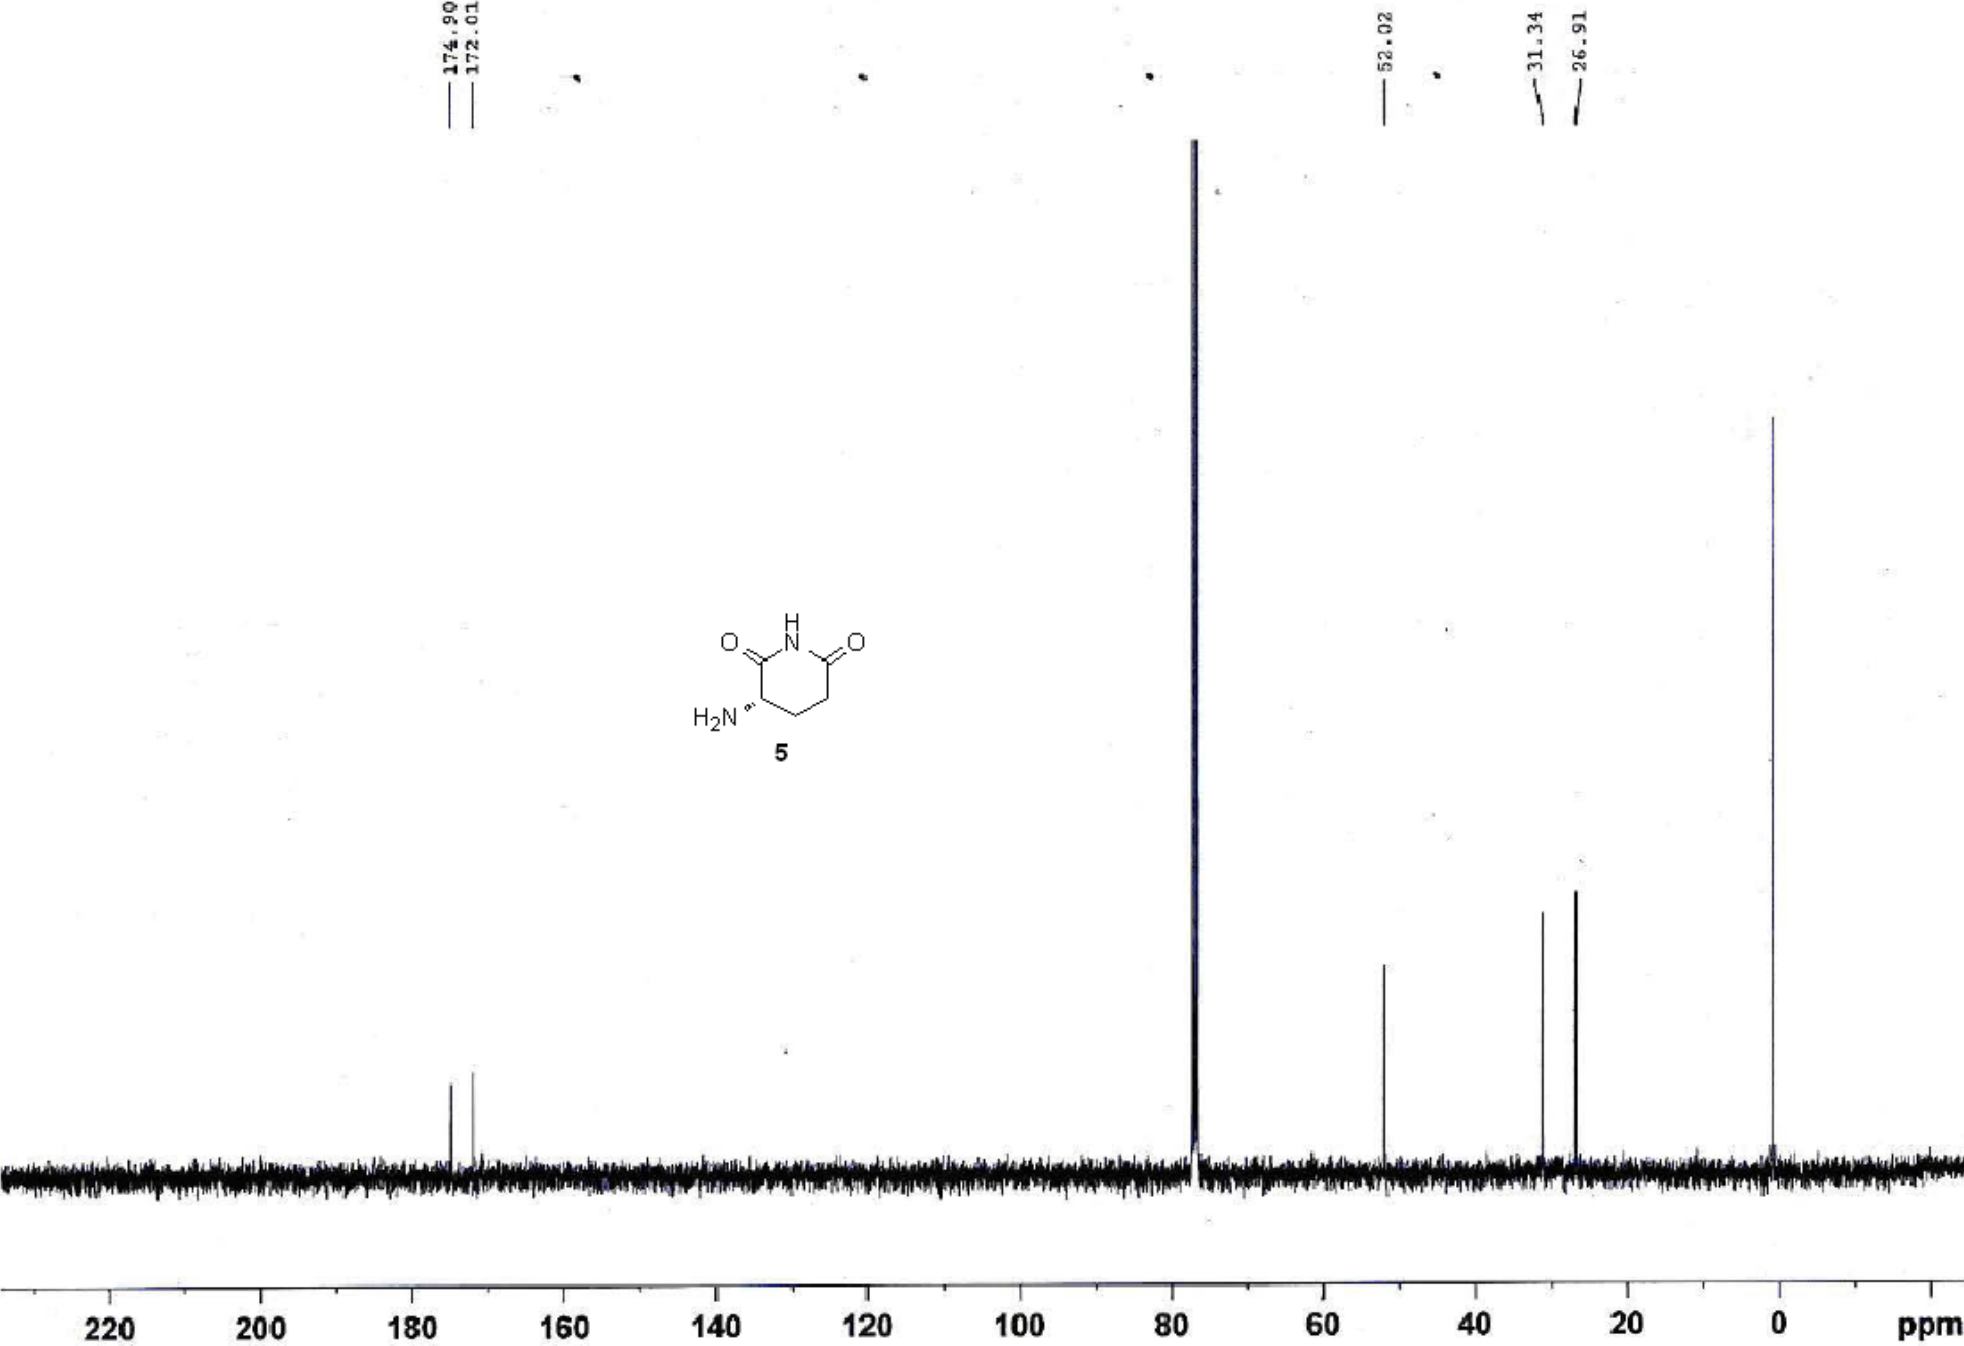

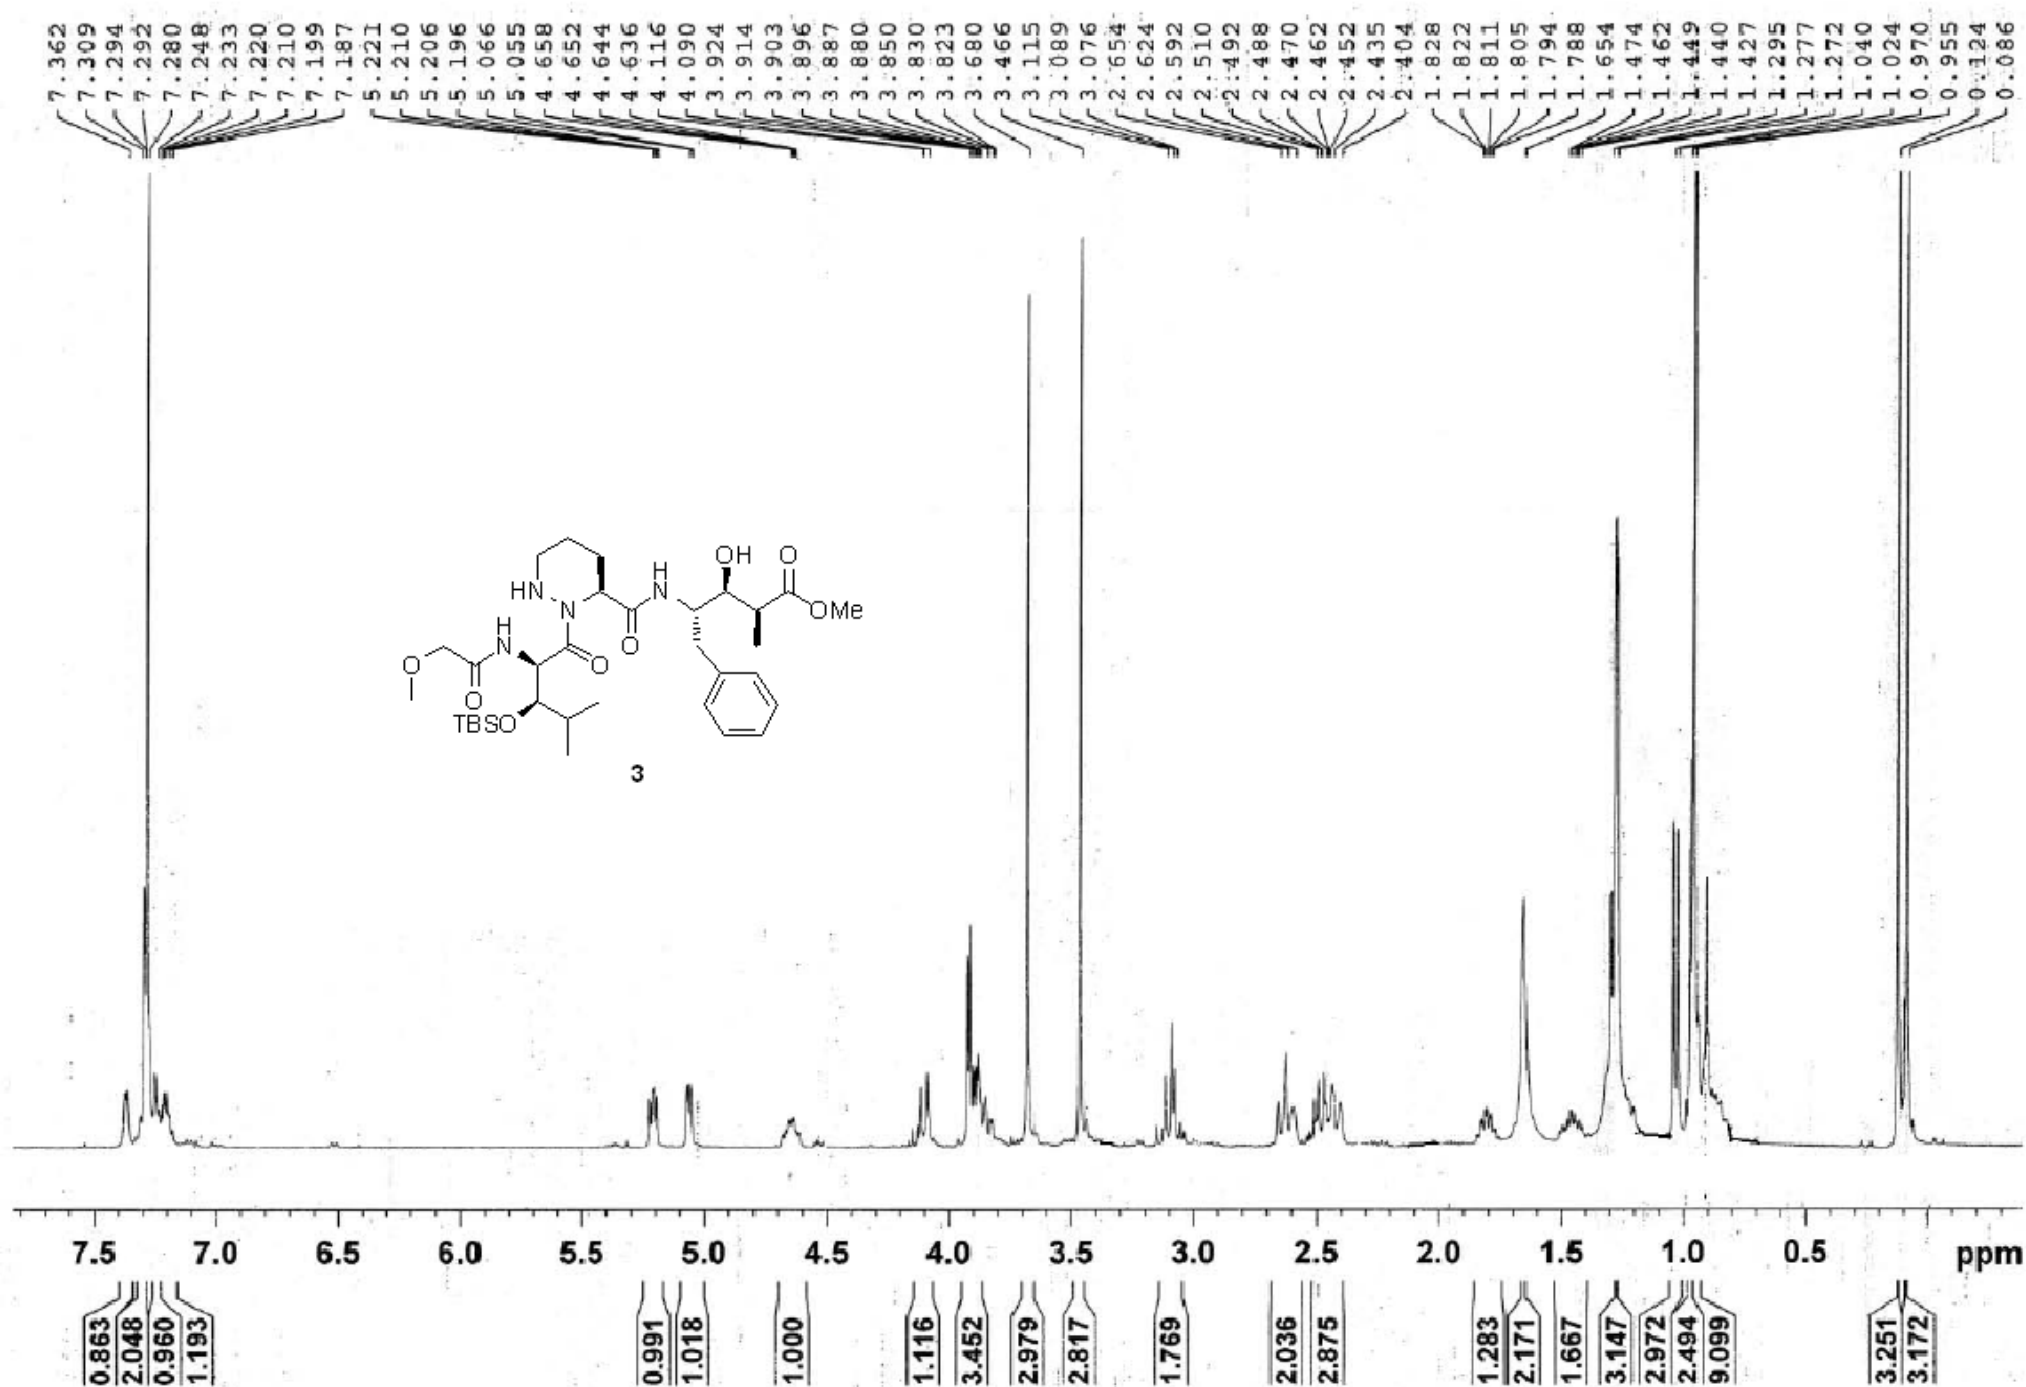

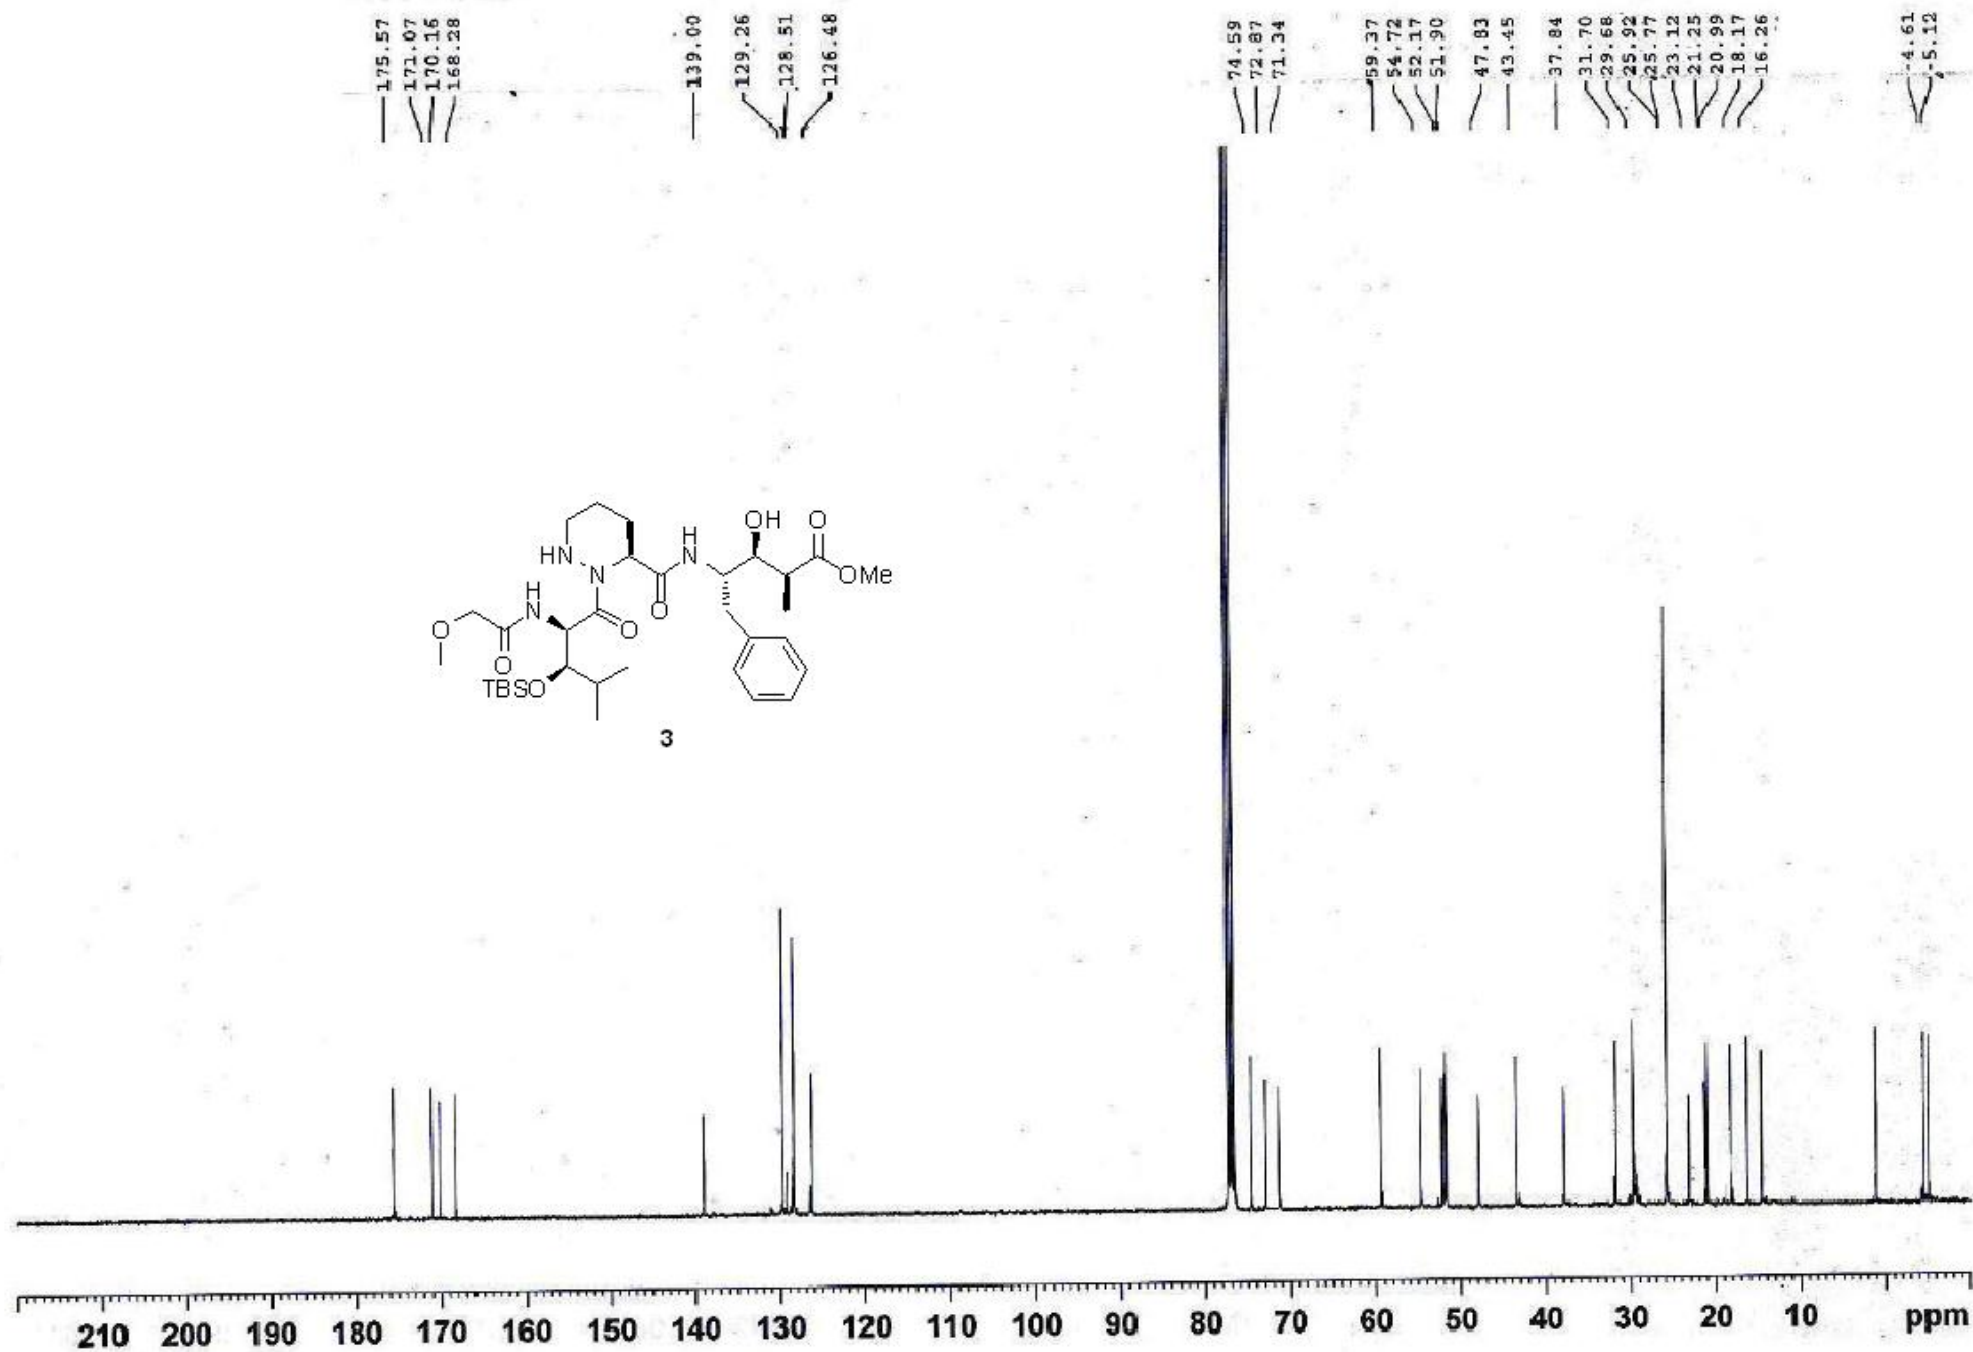



20120903-01

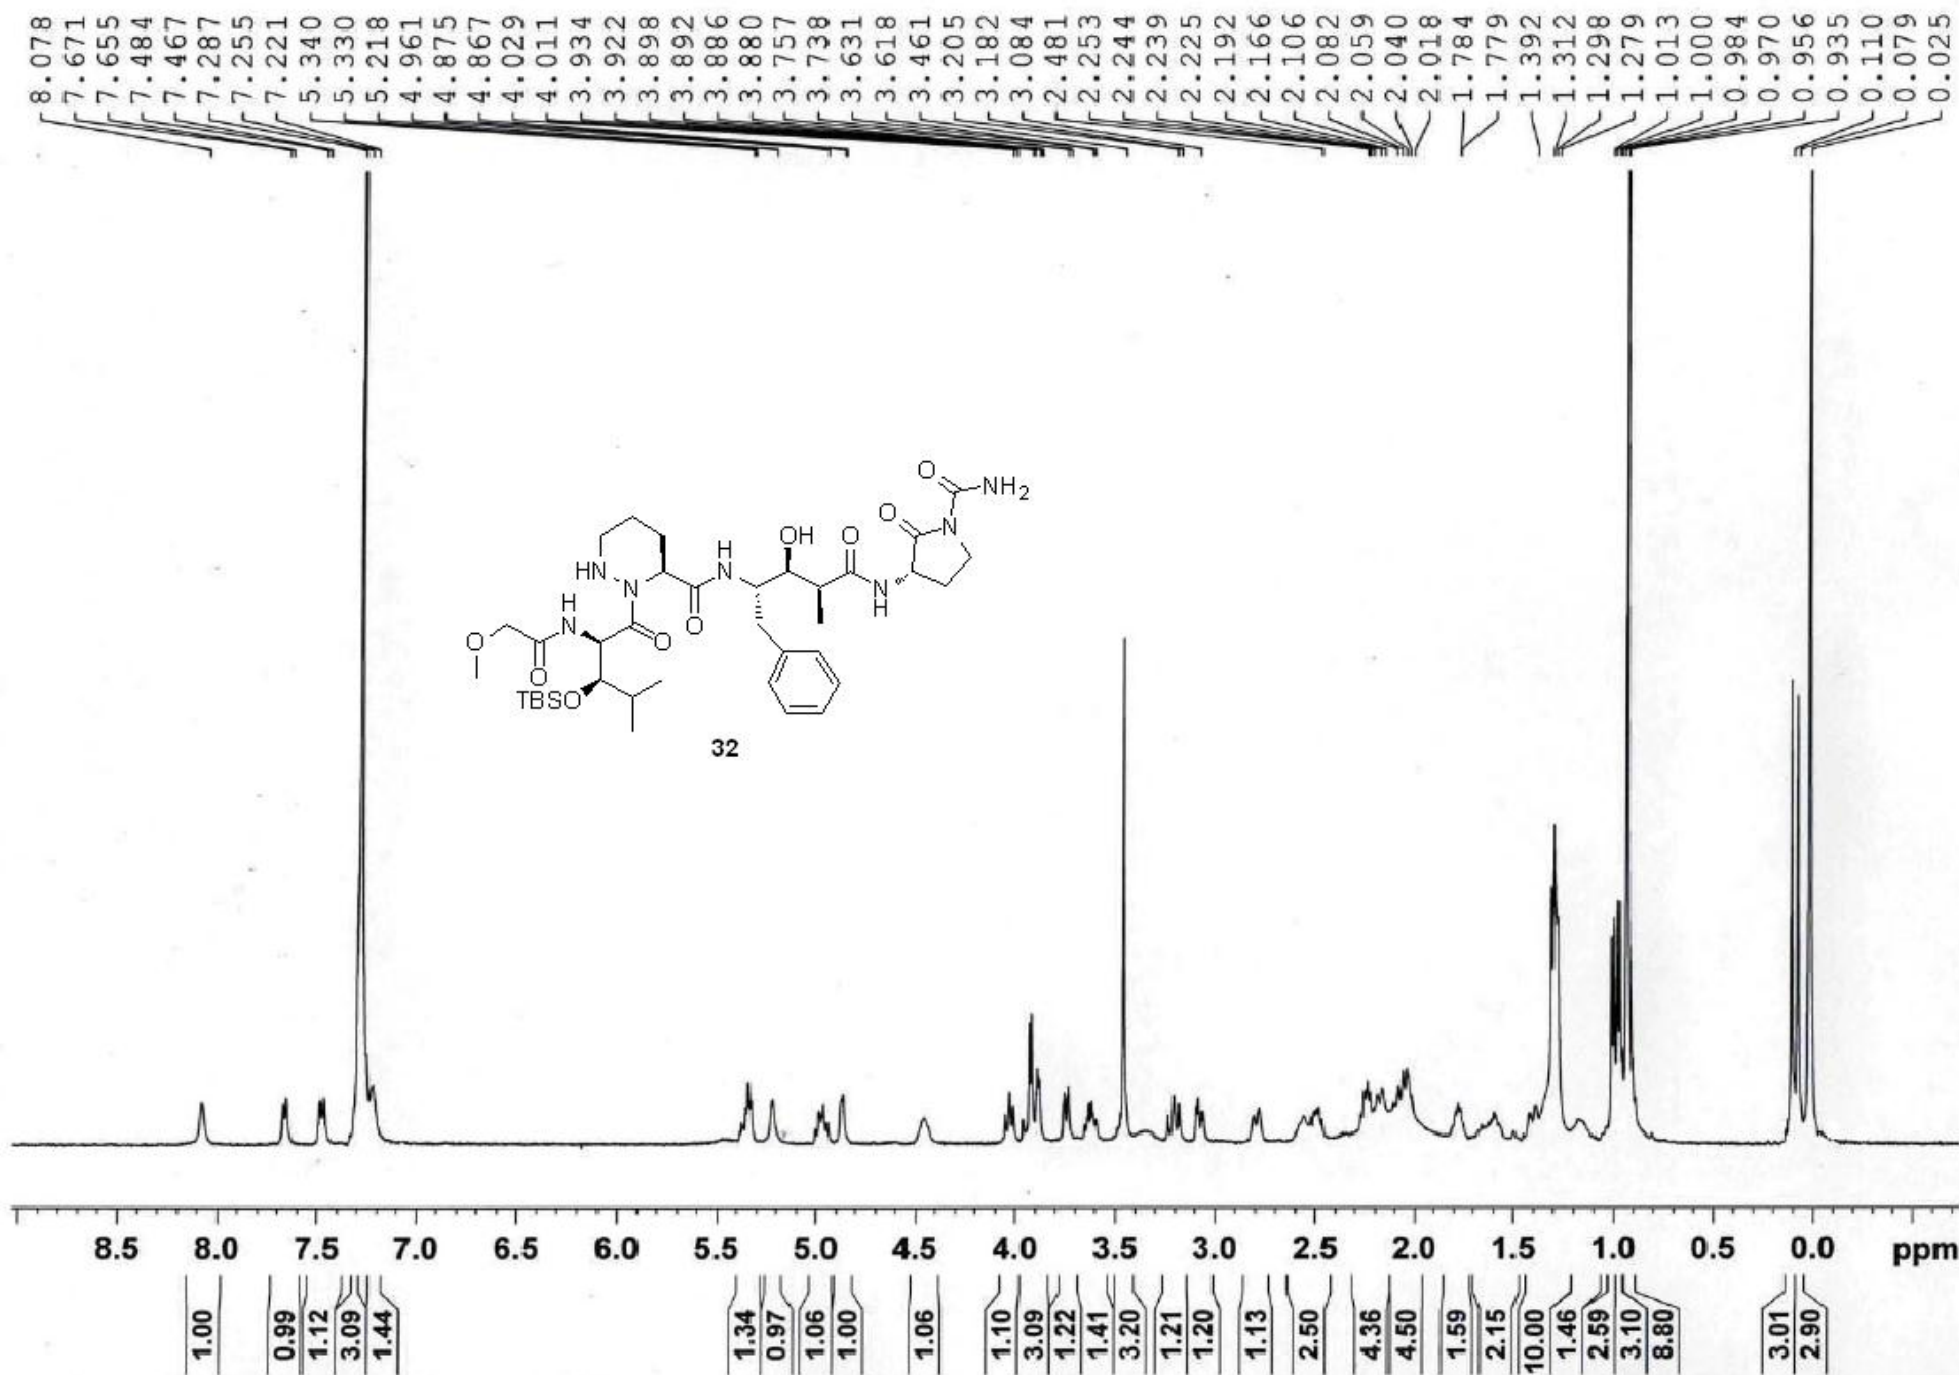



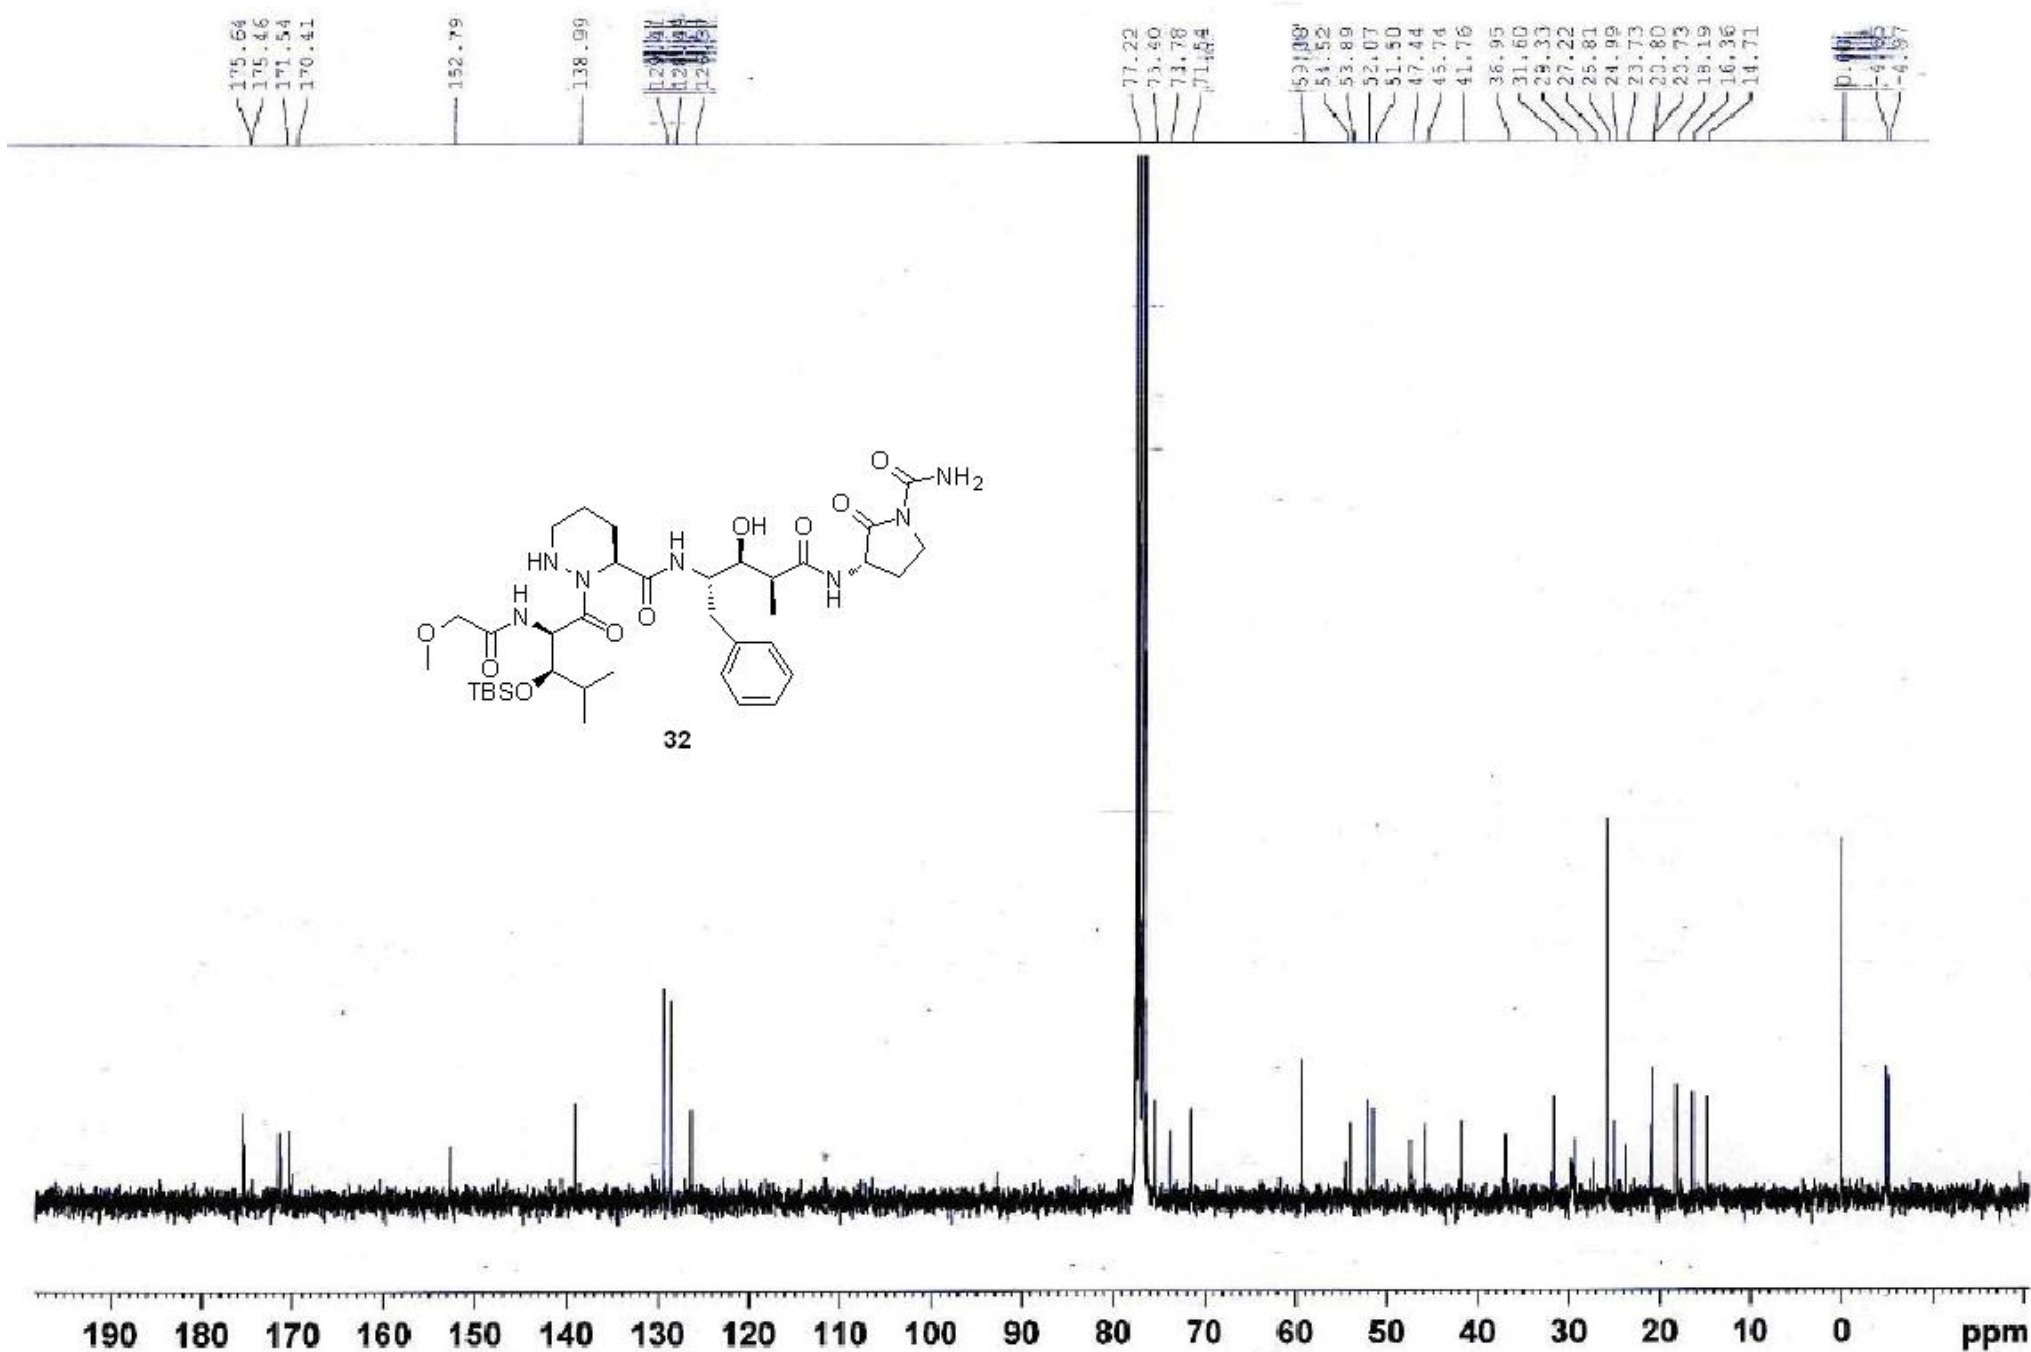

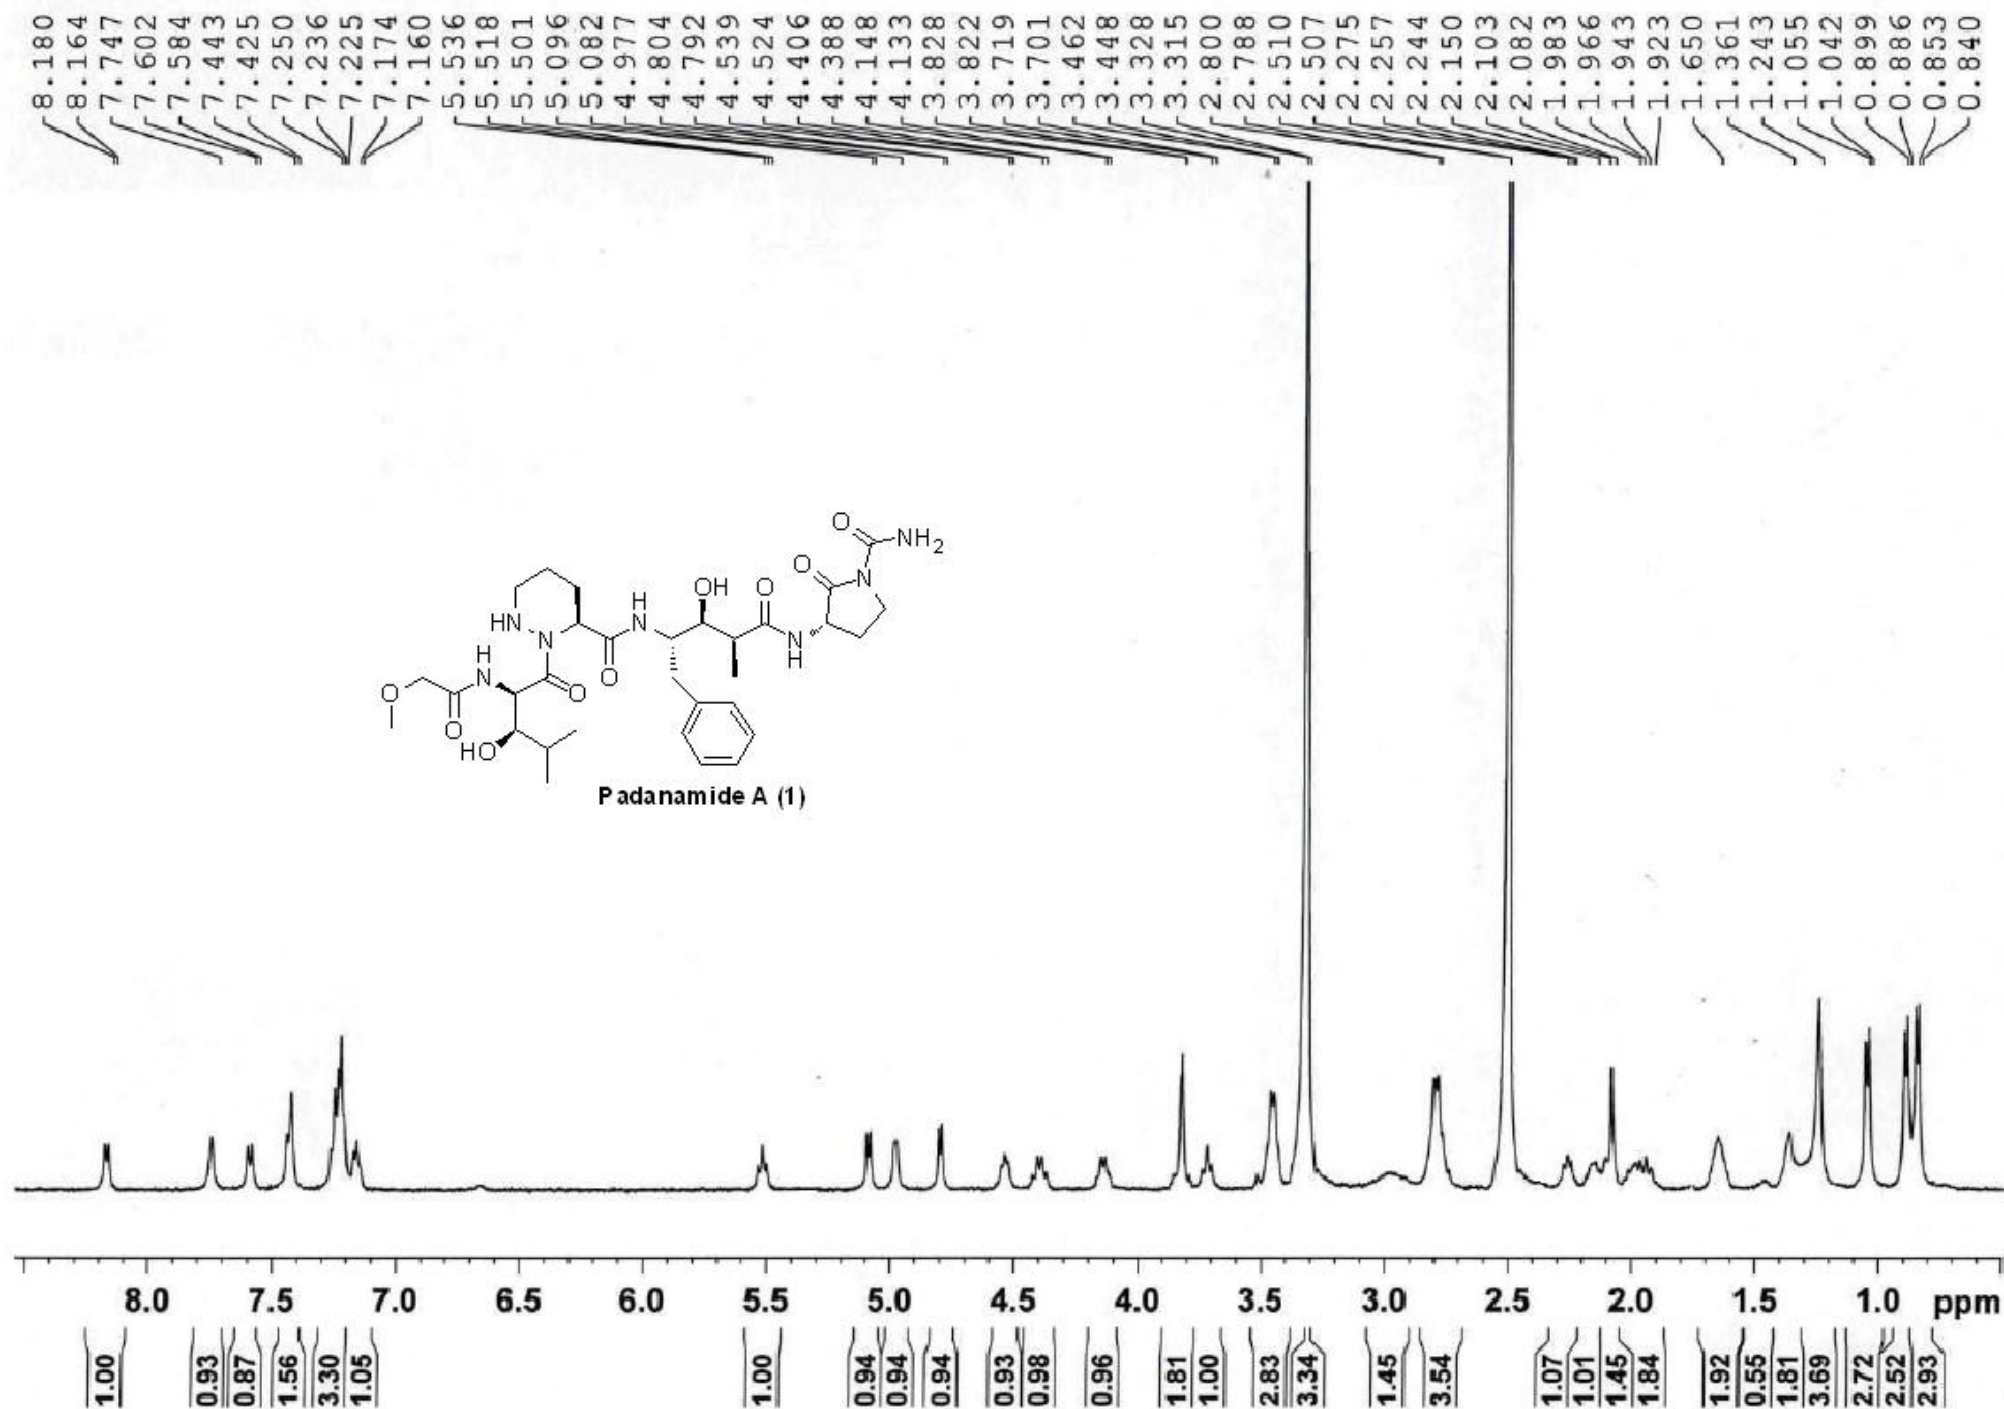

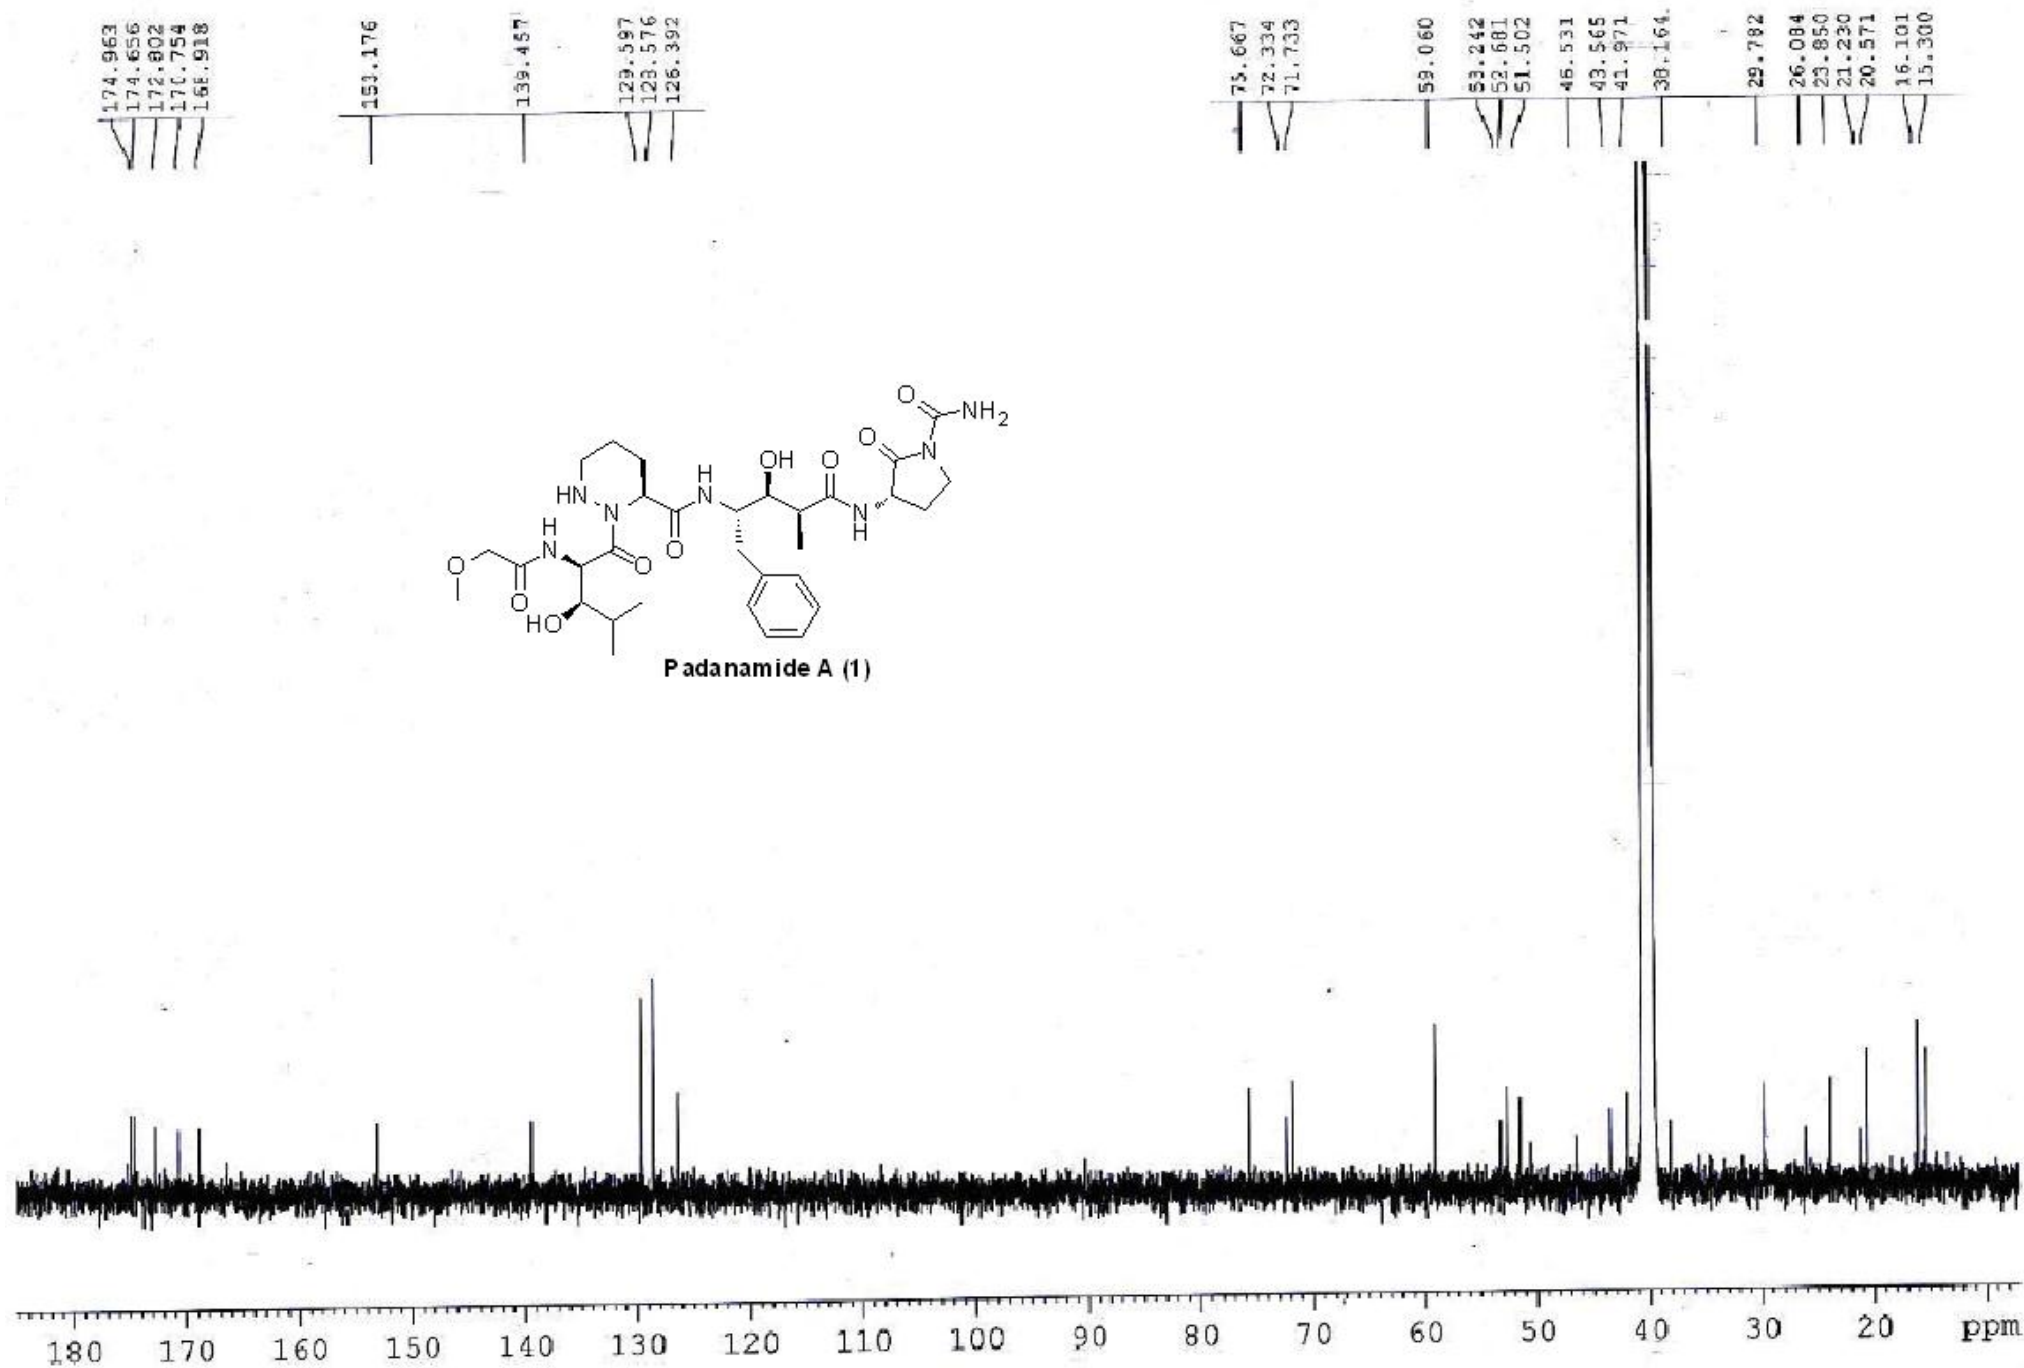

20120803-01

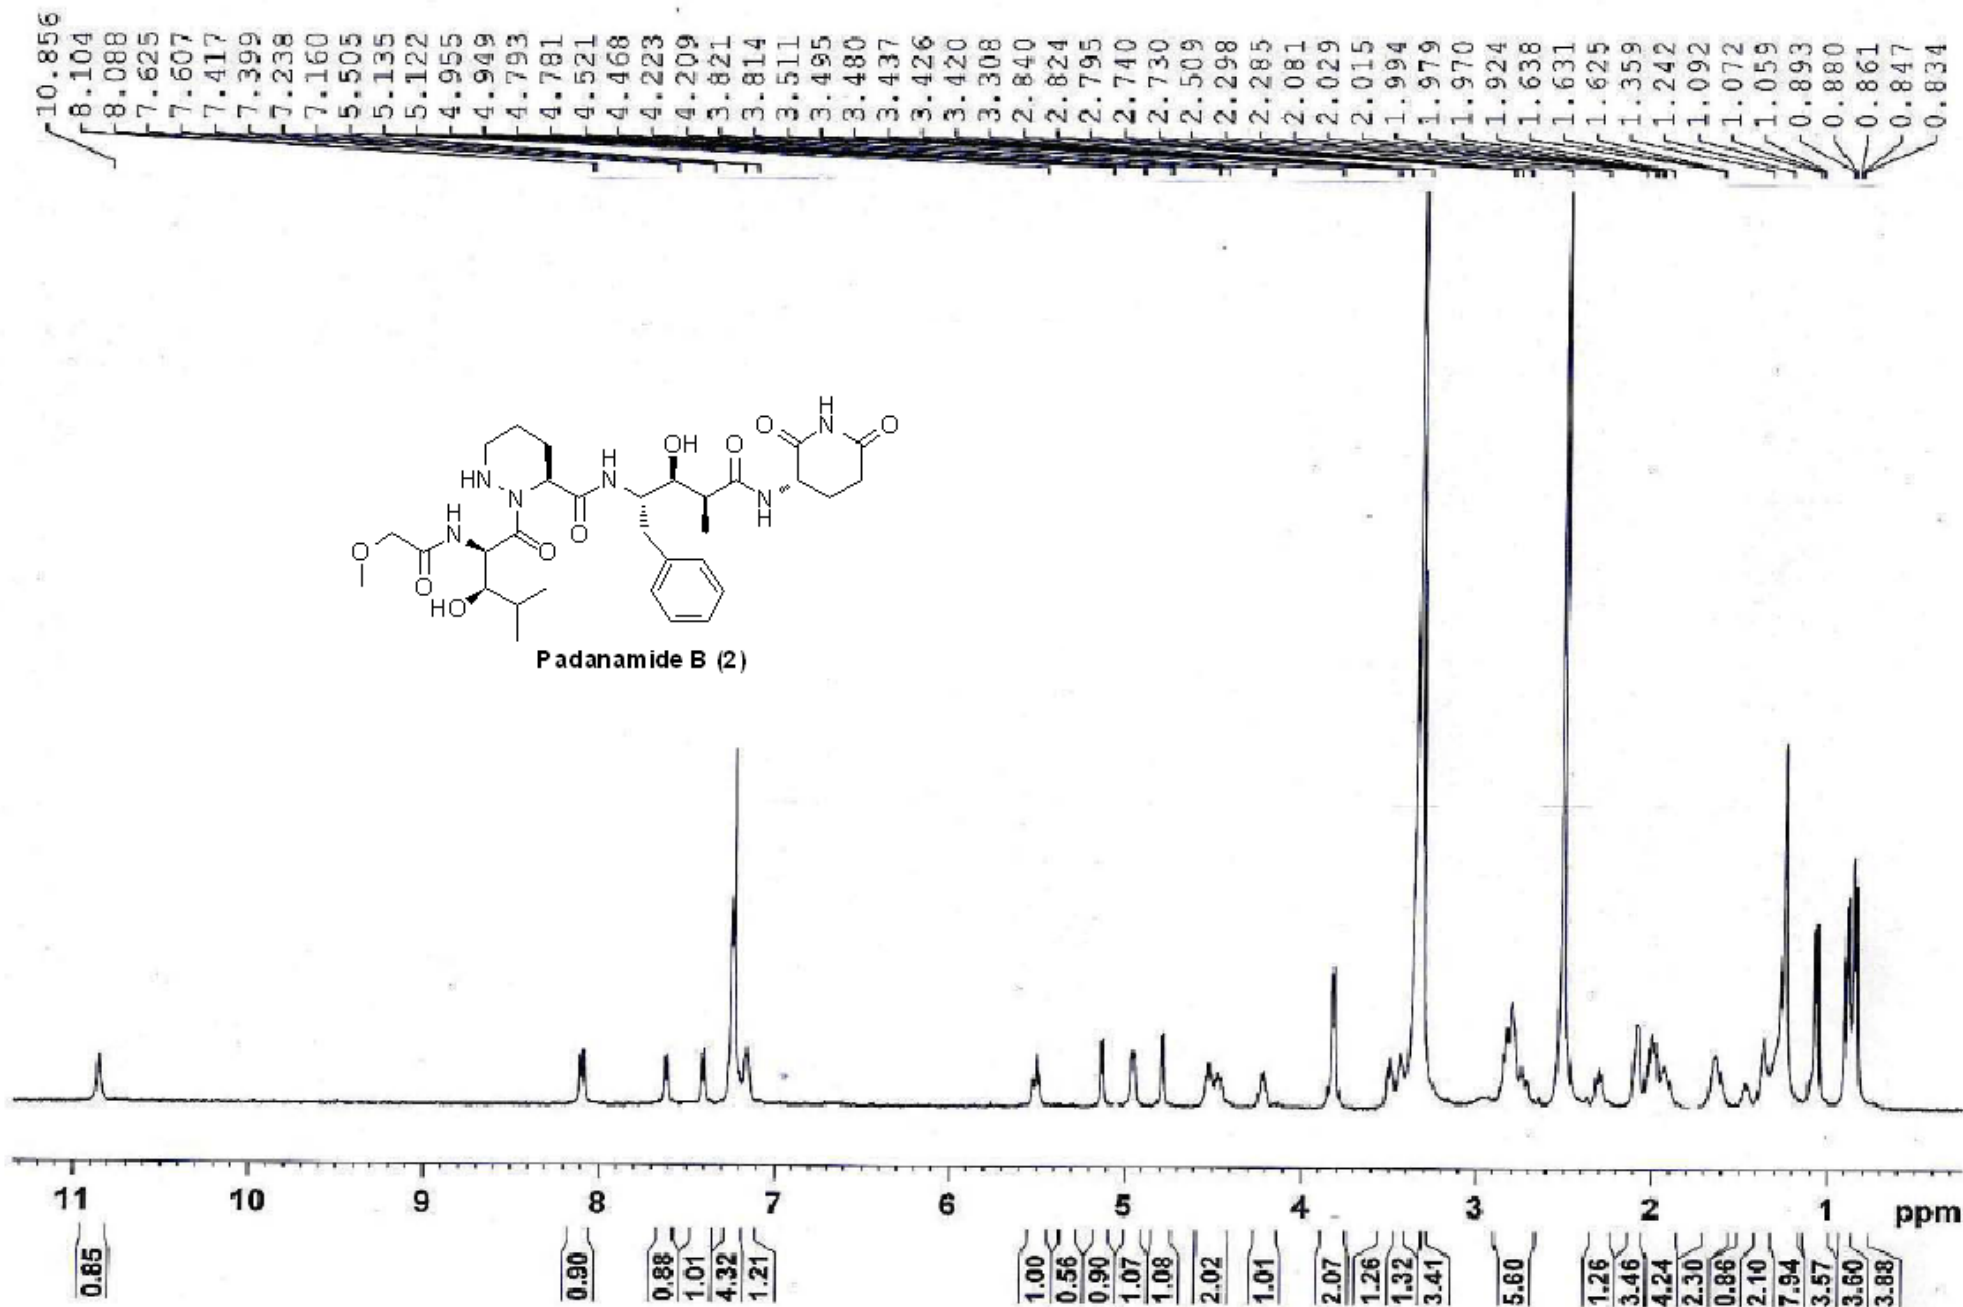

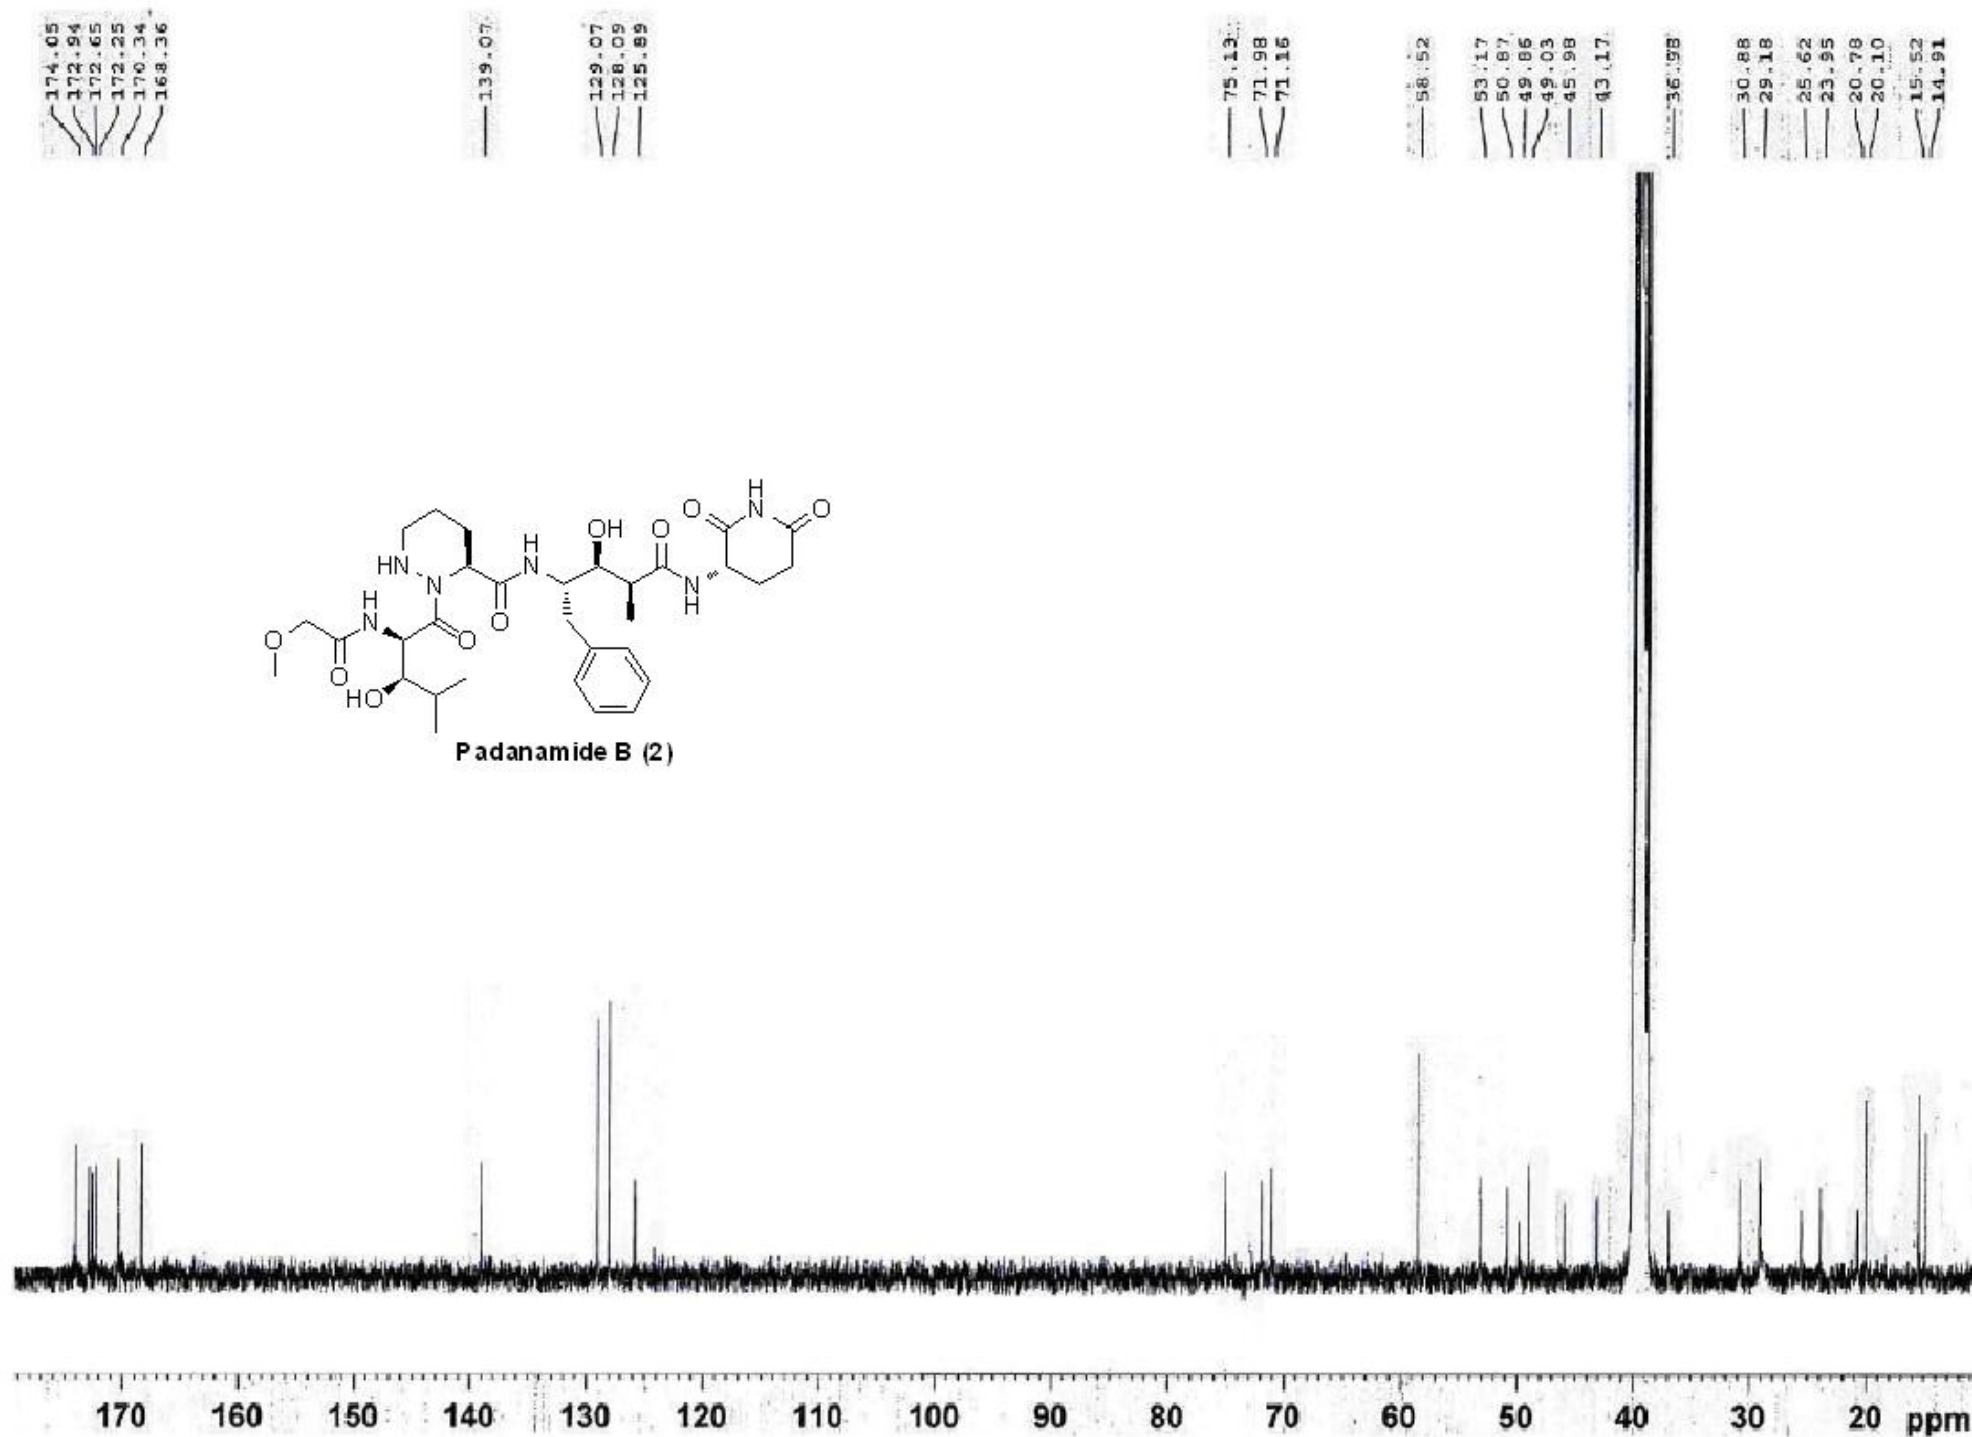

Supplement: c3cc00178d_2.pdf [file c3cc00178d_2.pdf]
